# Supplementary material for: Construction of five- and six-membered heterocycles on both Cp rings of the ferrocene moiety of α-oxoketene-S,S-acetal and β-oxodithioester via heteroaromatic annulation
Source: Royal Society of Chemistry journal article supplement (doi:10.1039/c2ra21744a), 2012-10-30

# Construction of five- and six-membered heterocycles on both Cp rings of ferrocene moiety of $\alpha$ -oxoketene-S,S-acetal and $\beta$ -oxodithioester via heteroaromatic annulation

Girijesh Kumar Verma, Rajiv Kumar Verma, and Maya Shankar Singh\*

Department of Chemistry, Faculty of Science, Banaras Hindu University, Varanasi 221005, India

[mssinghbhu@yahoo.co.in](mailto:mssinghbhu@yahoo.co.in)

## *Supplementary Information*

### Contents

|                                                                                                   |    |
|---------------------------------------------------------------------------------------------------|----|
| $^1\text{H}$ , $^{13}\text{C}$ NMR, and HRMS Spectra of the starting materials and final products | S2 |
|---------------------------------------------------------------------------------------------------|----|

<sup>1</sup>H NMR Spectrum of 1,1'-Bis(methyl-3-hydroxy-prop-2-ene-dithioate)ferrocene 2

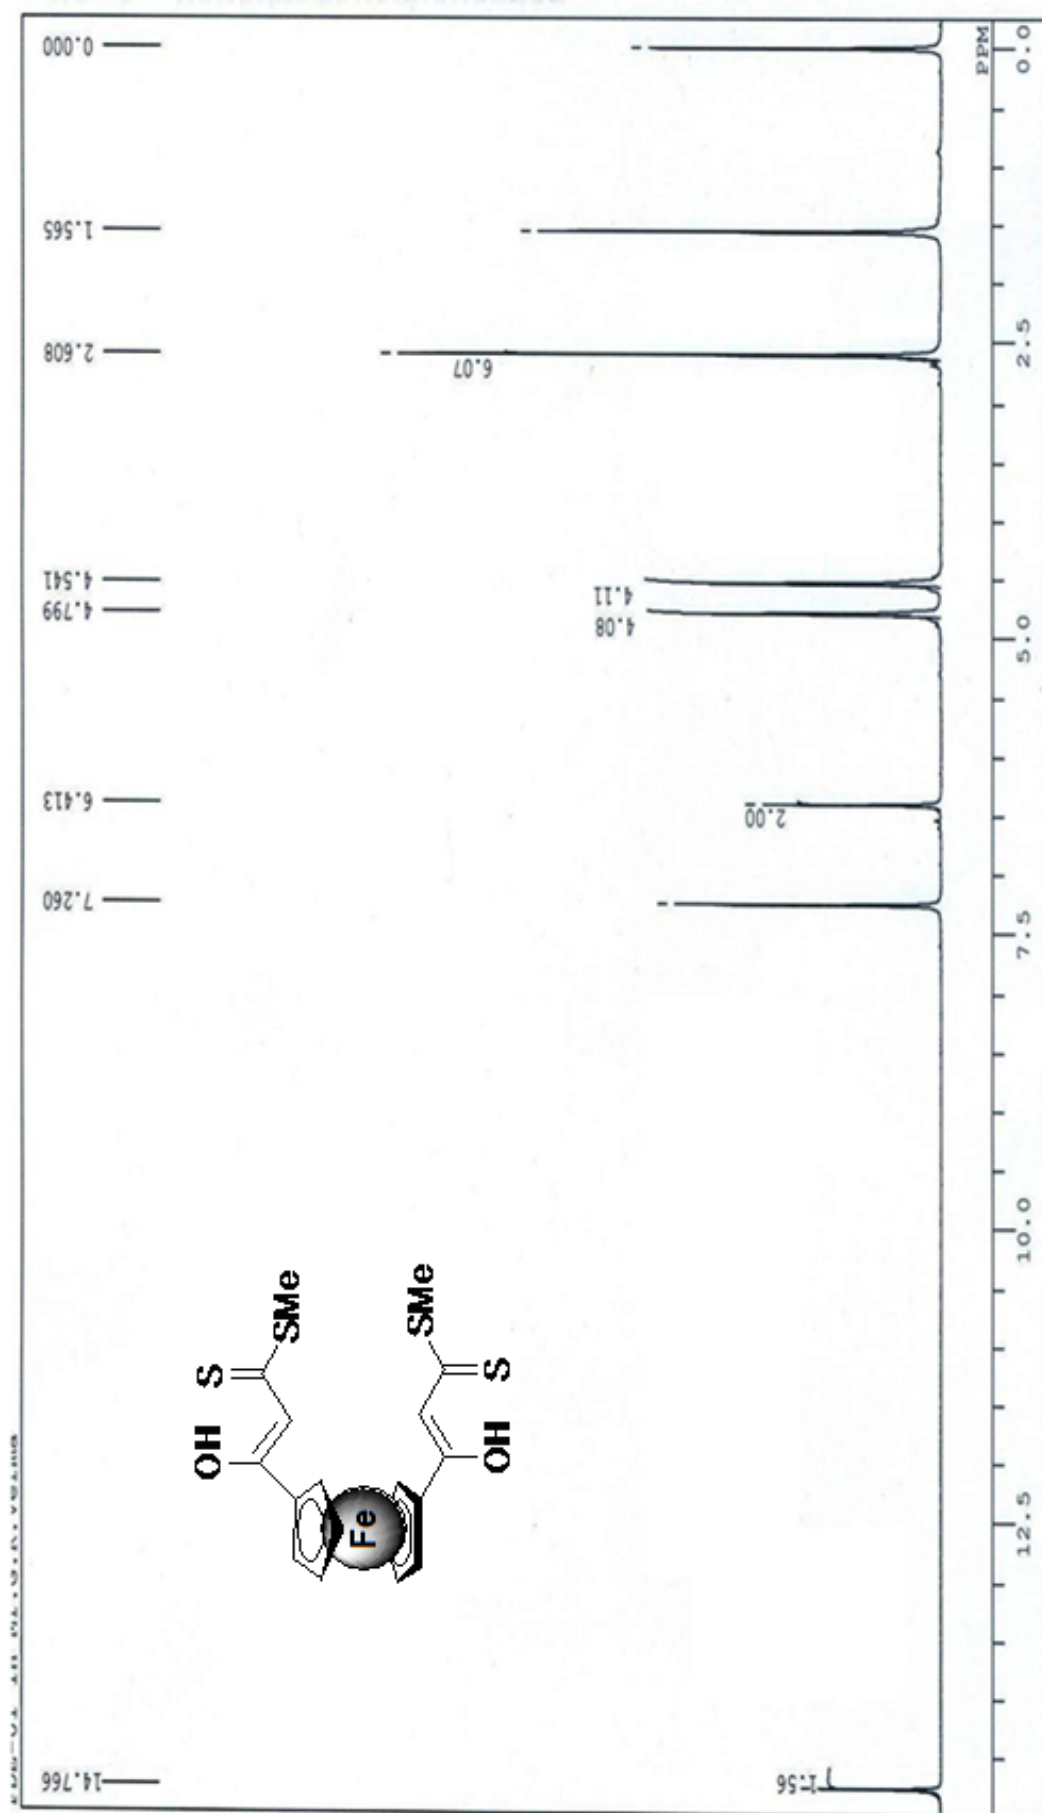

$^{13}\text{C}$  NMR Spectrum of 1,1'-Bis(methyl-3-hydroxy-prop-2-ene-dithioate)ferrocene 2

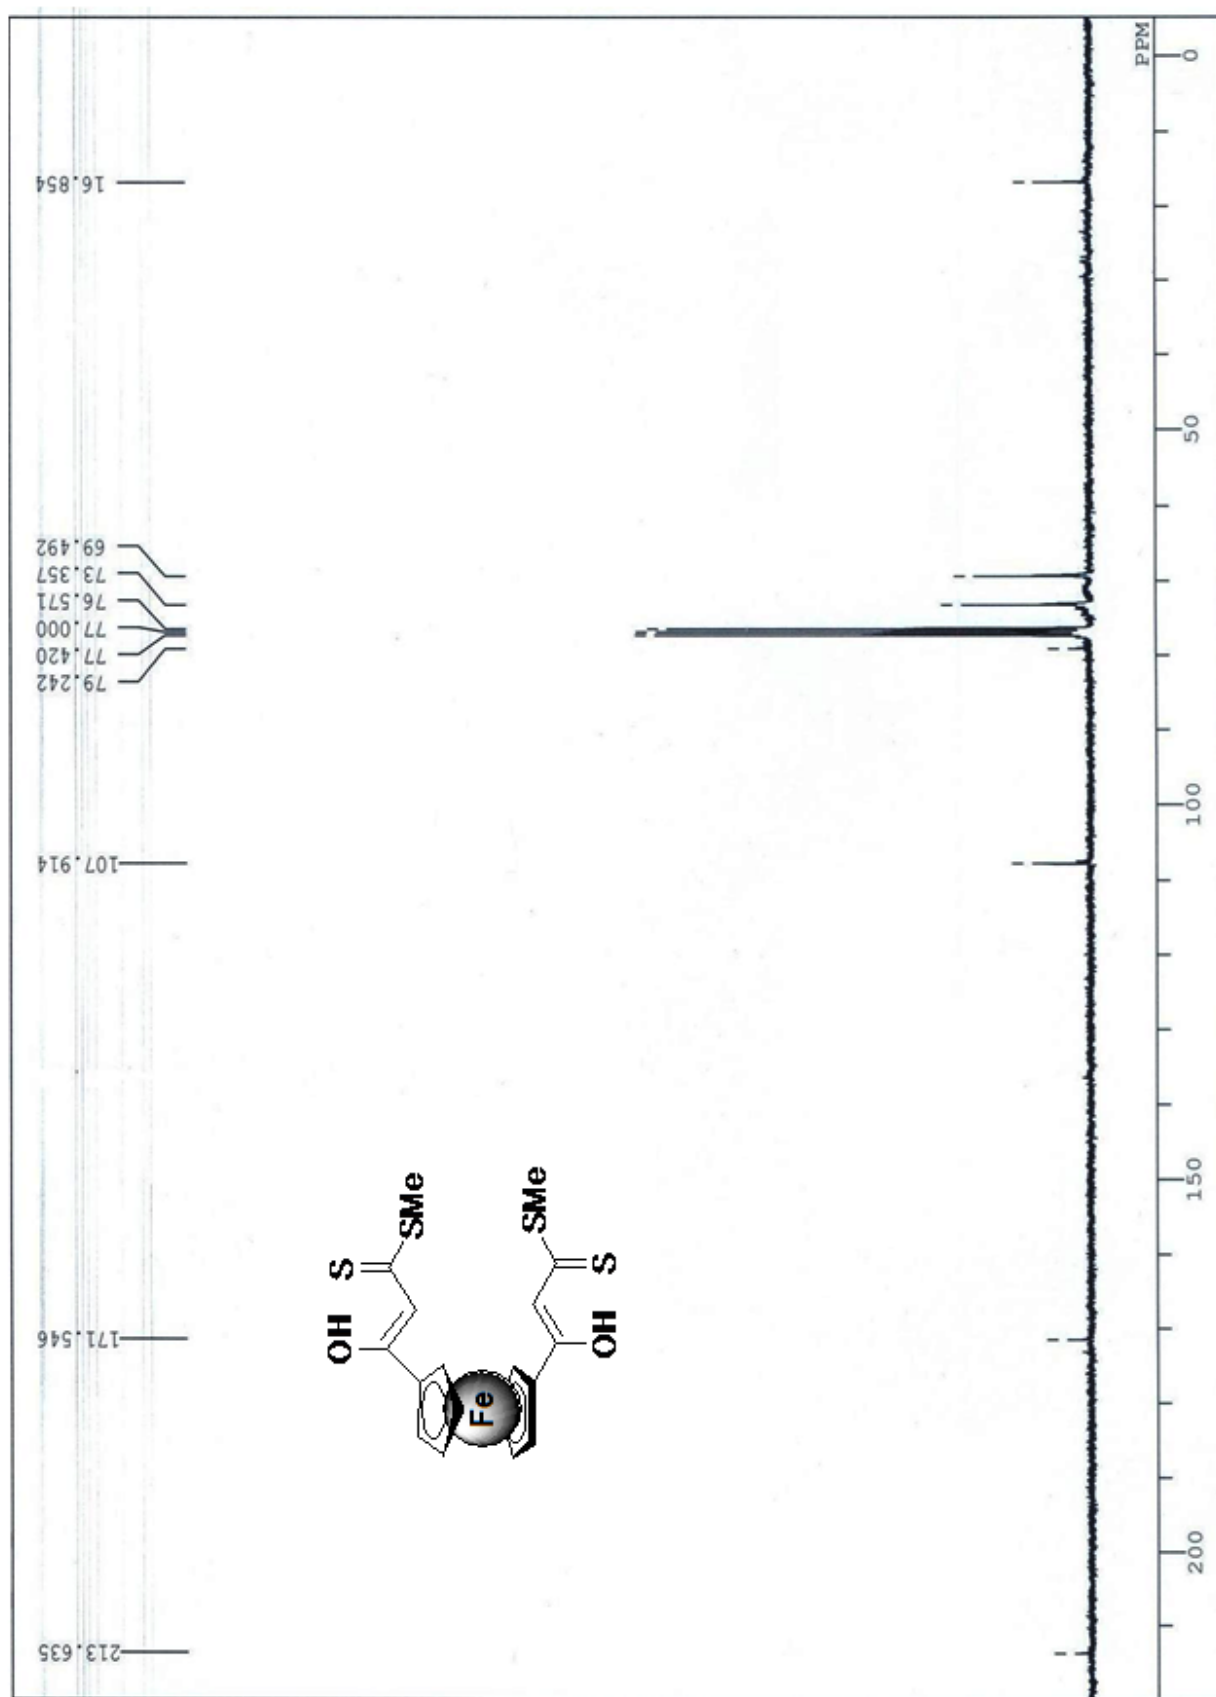

<sup>1</sup>H NMR Spectrum of 1,1'-Bis(1,1-dimethylsulfanyl-3-oxo-1-propene)ferrocene **3**

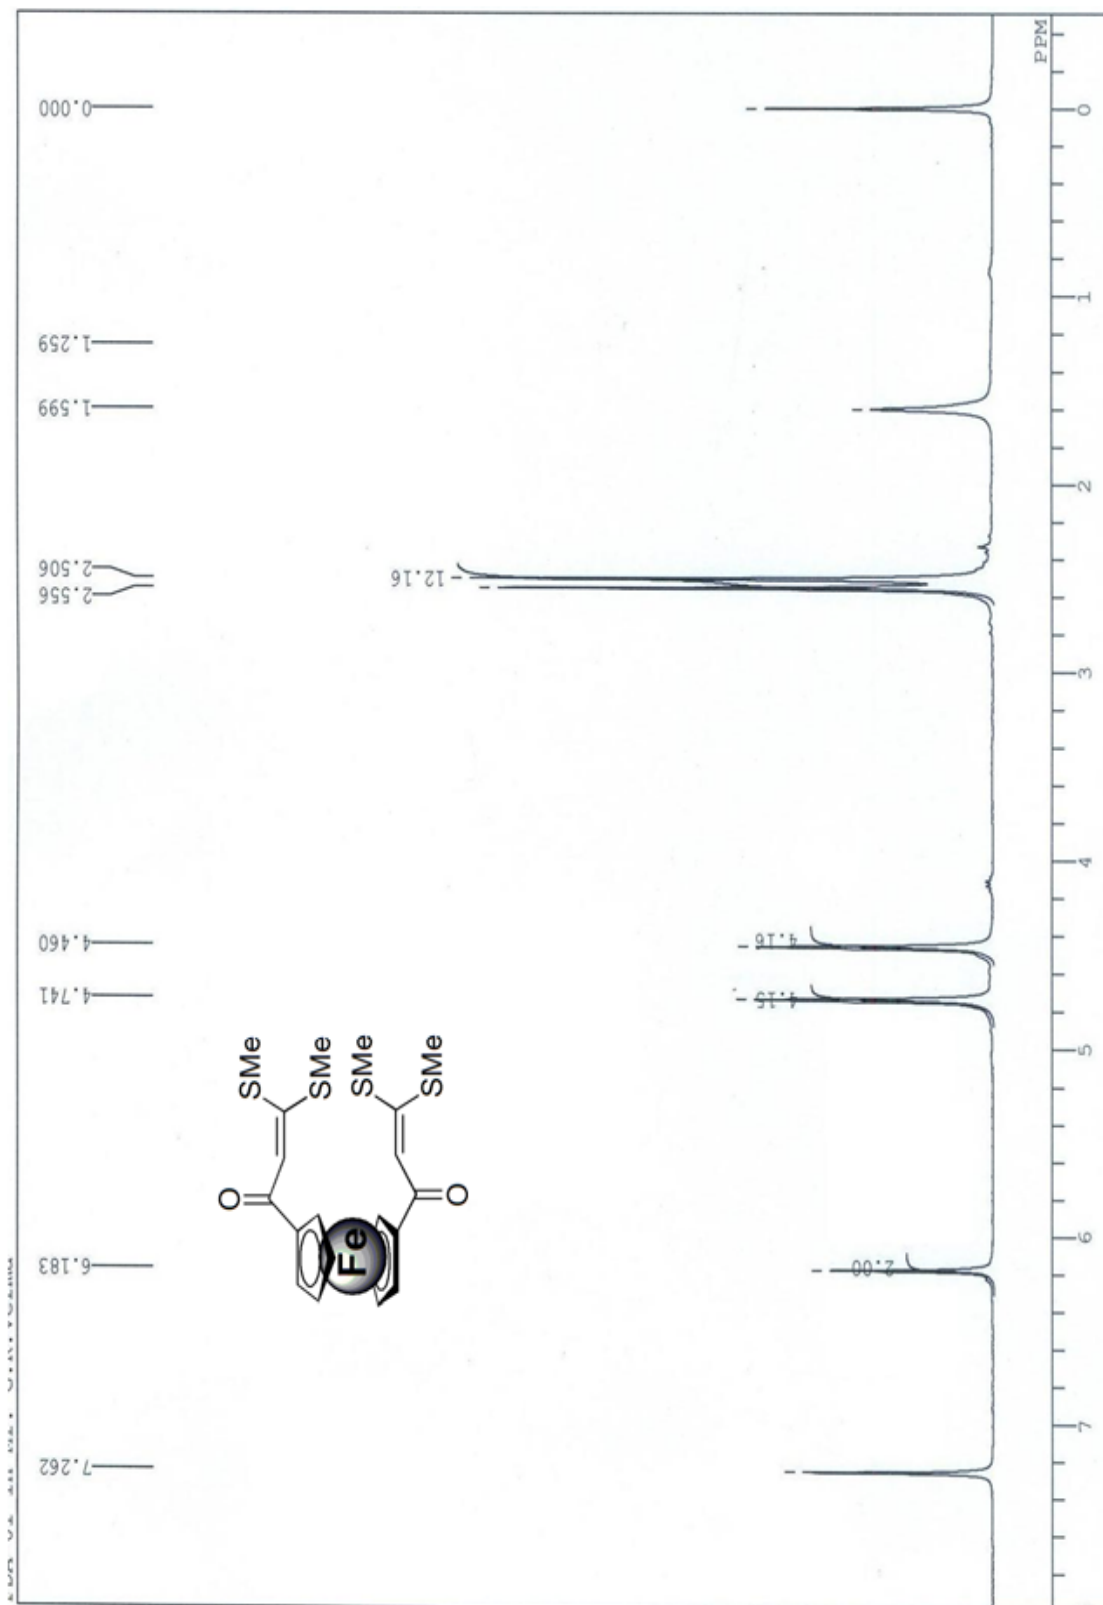

$^{13}\text{C}$  NMR Spectrum of 1,1'-Bis(1,1-dimethylsulfanyl-3-oxo-1-propene)ferrocene 3

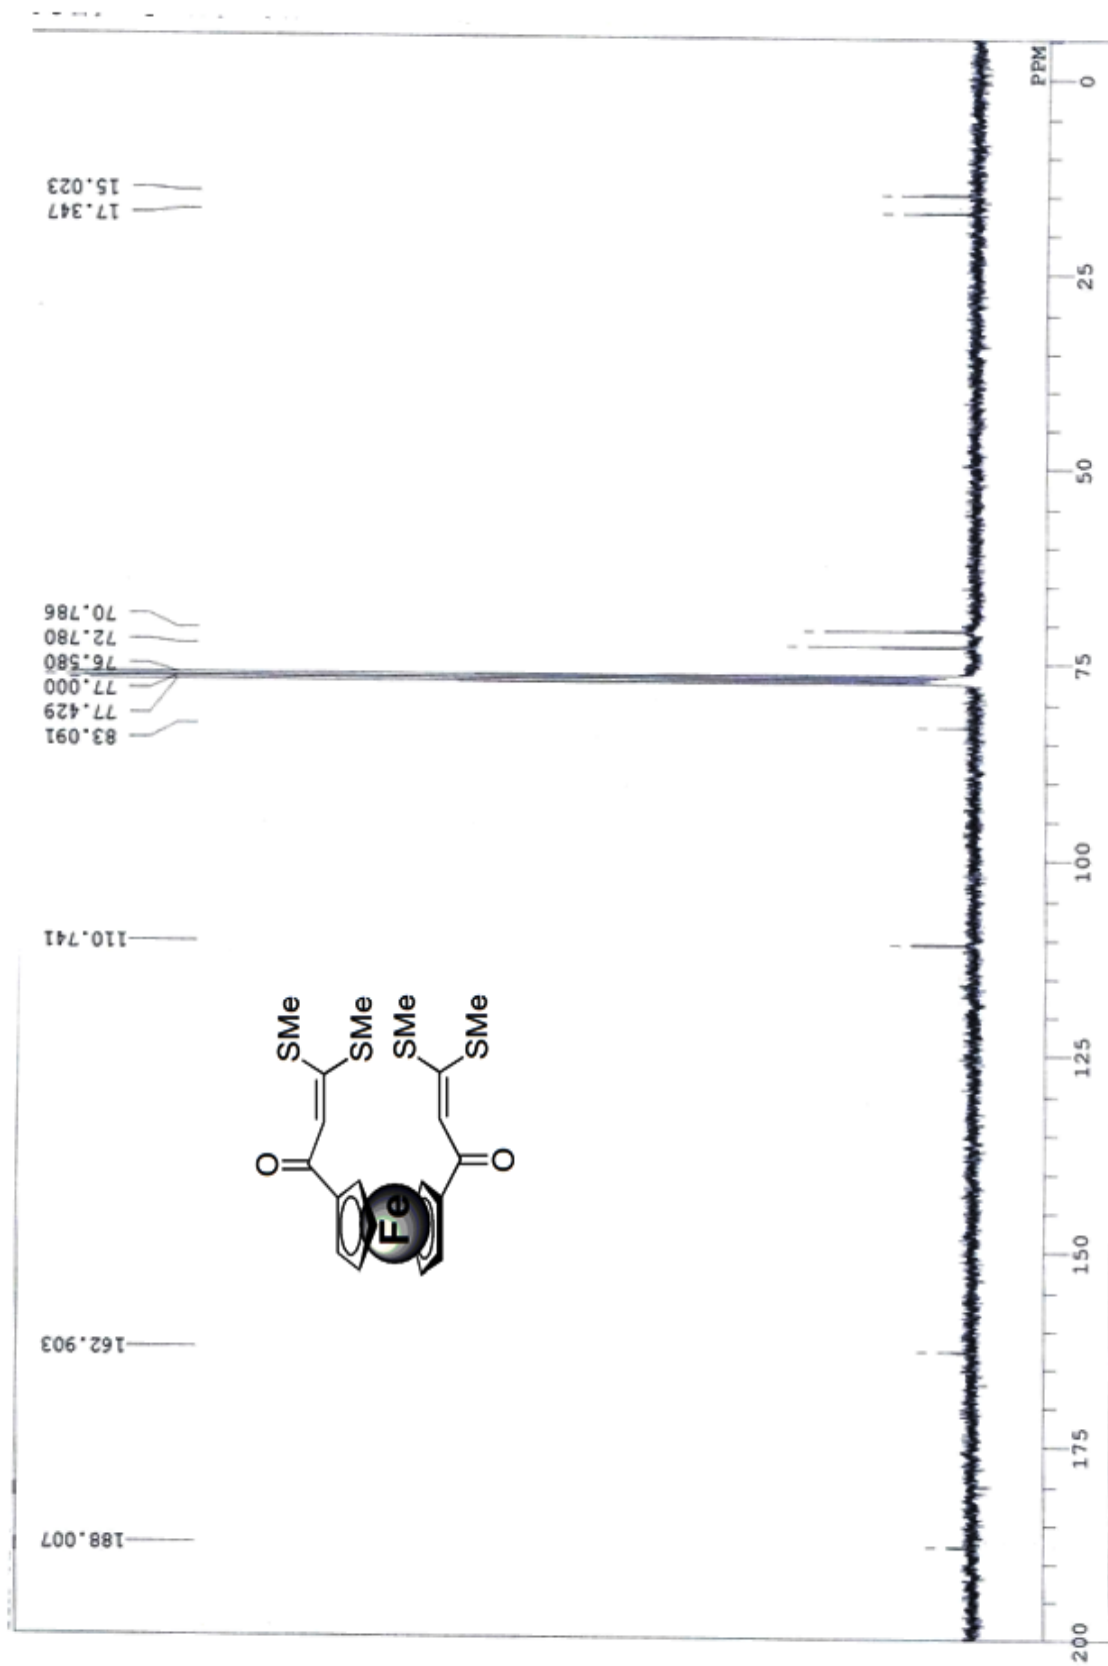

### LC-HRMS Spectrum of 1,1'-Bis(1,1-dimethylsulfanyl-3-oxo-1-propene)ferrocene 3

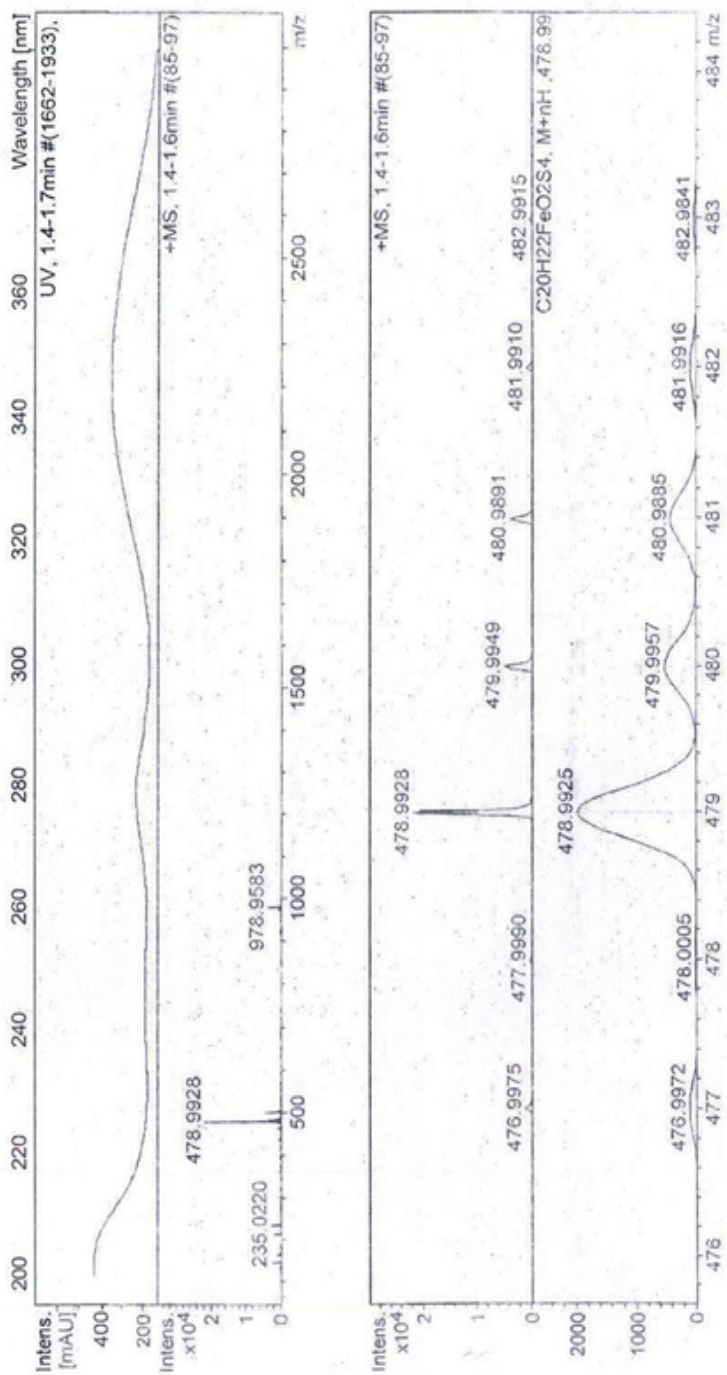

Bruker Compass DataAnalysis 4.0 printed: 2/21/2012 3:37:14 PM Page 1 of 1

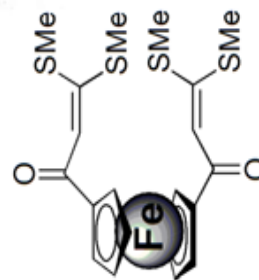

<sup>1</sup>H NMR Spectrum of 1,1'-Bis(3-methylsulfanyl-1-phenyl-pyrazole-5-yl)ferrocene 4

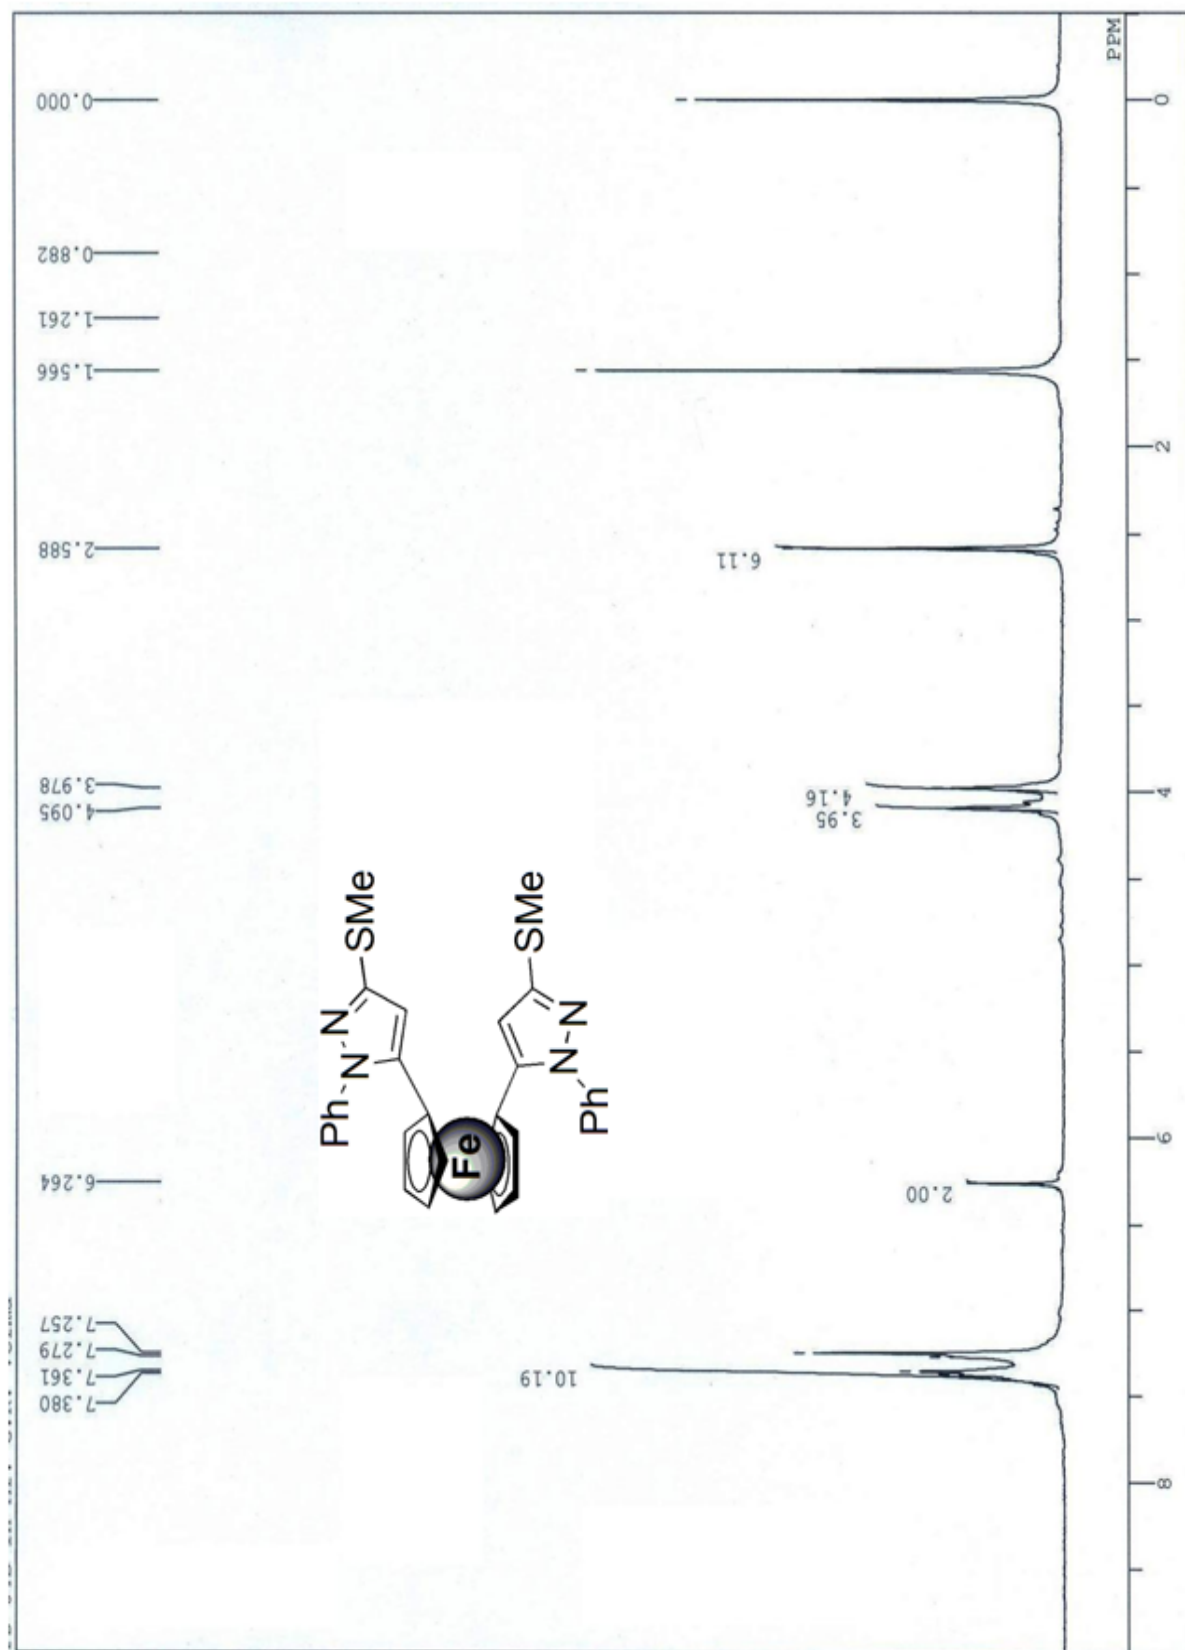

$^{13}\text{C}$  NMR Spectrum of 1,1'-Bis(3-methylsulfanyl-1-phenyl-pyrazole-5-yl)ferrocene 4

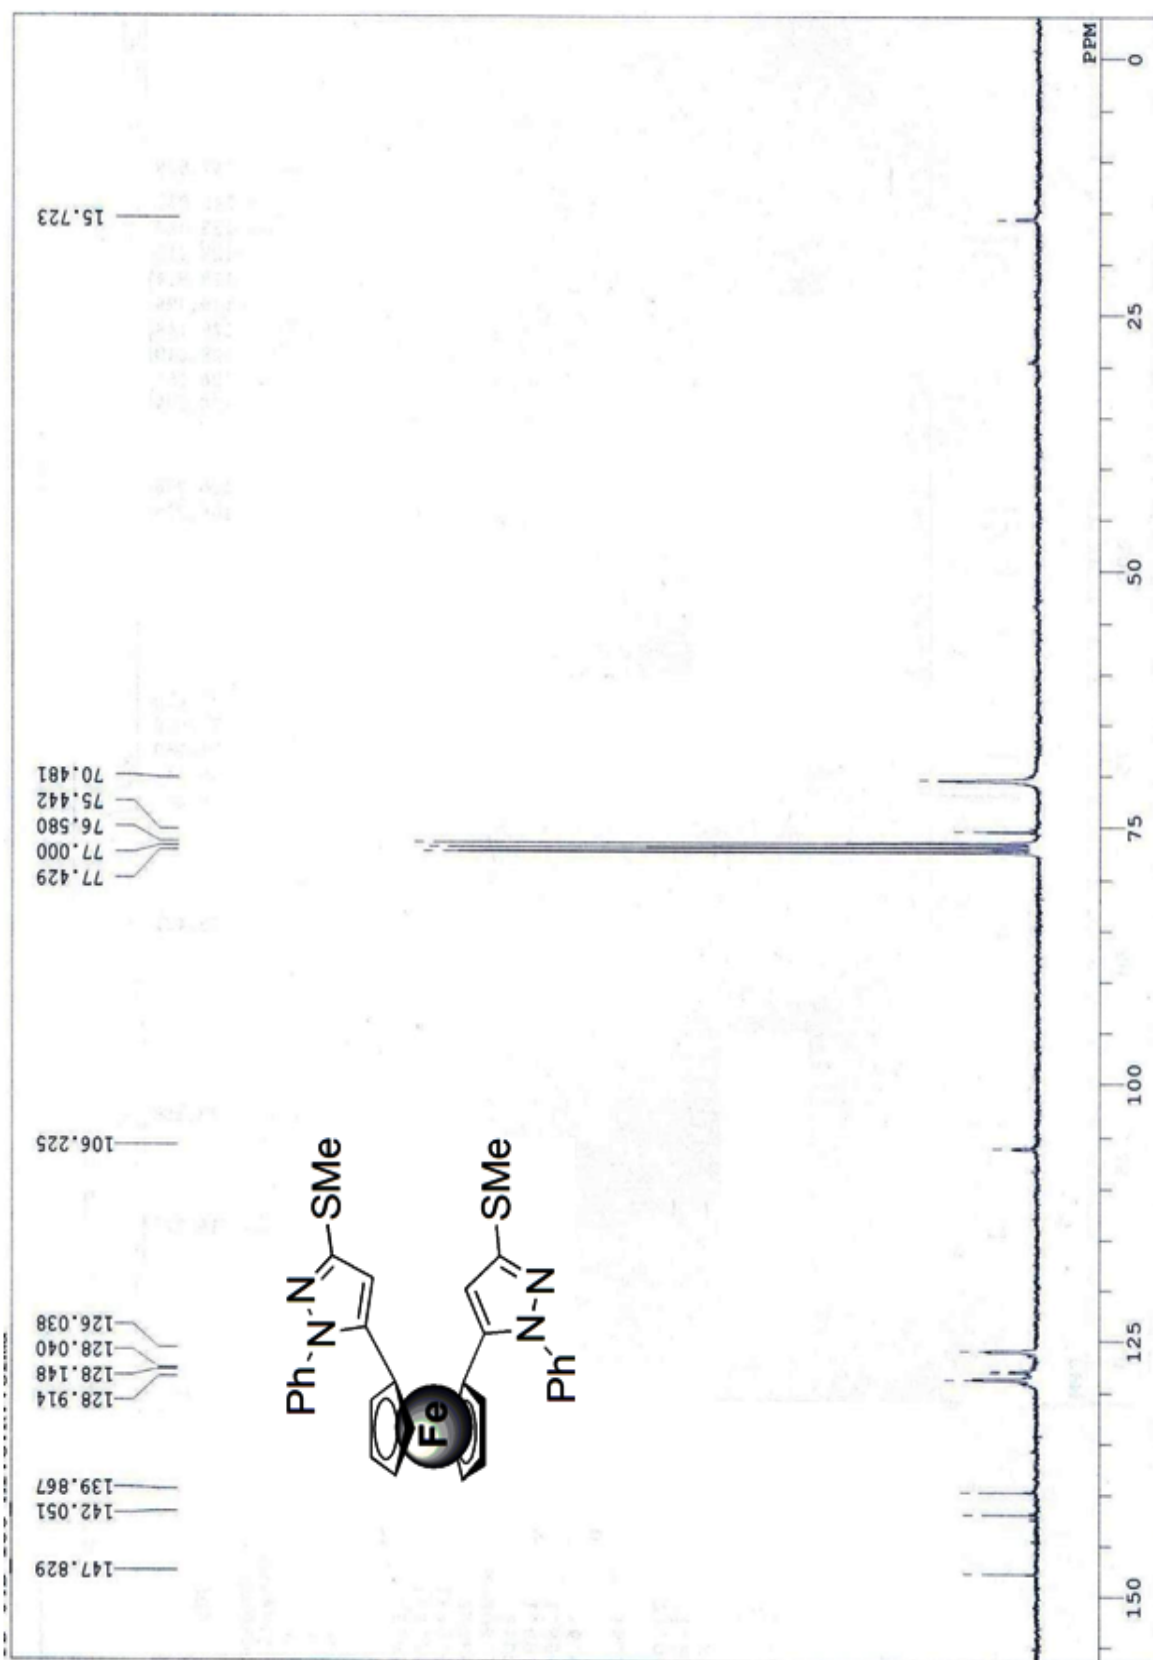



HRMS Spectrum of 1,1'-Bis(3-methylsulfanyl-1-phenyl-pyrazole-5-yl)ferrocene 4

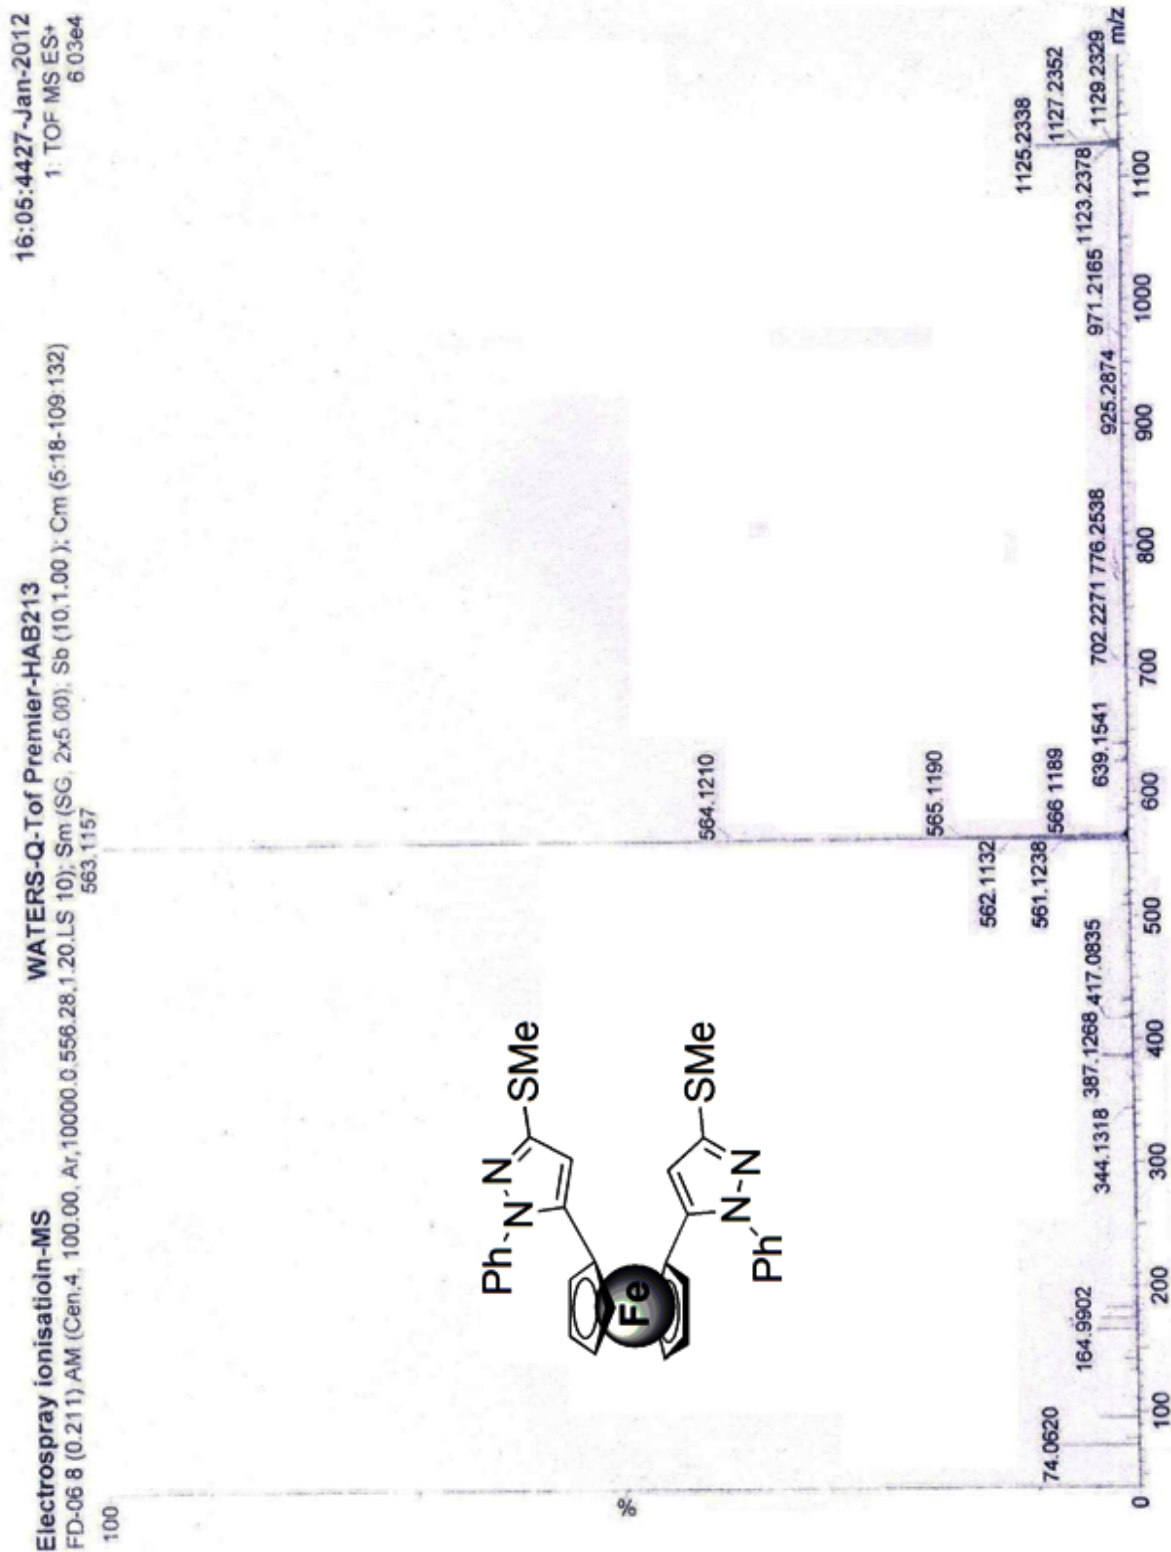

<sup>1</sup>H NMR Spectrum of 1,1'-Bis(3-methylsulfanyl-pyrazole-5-yl)ferrocene **5**

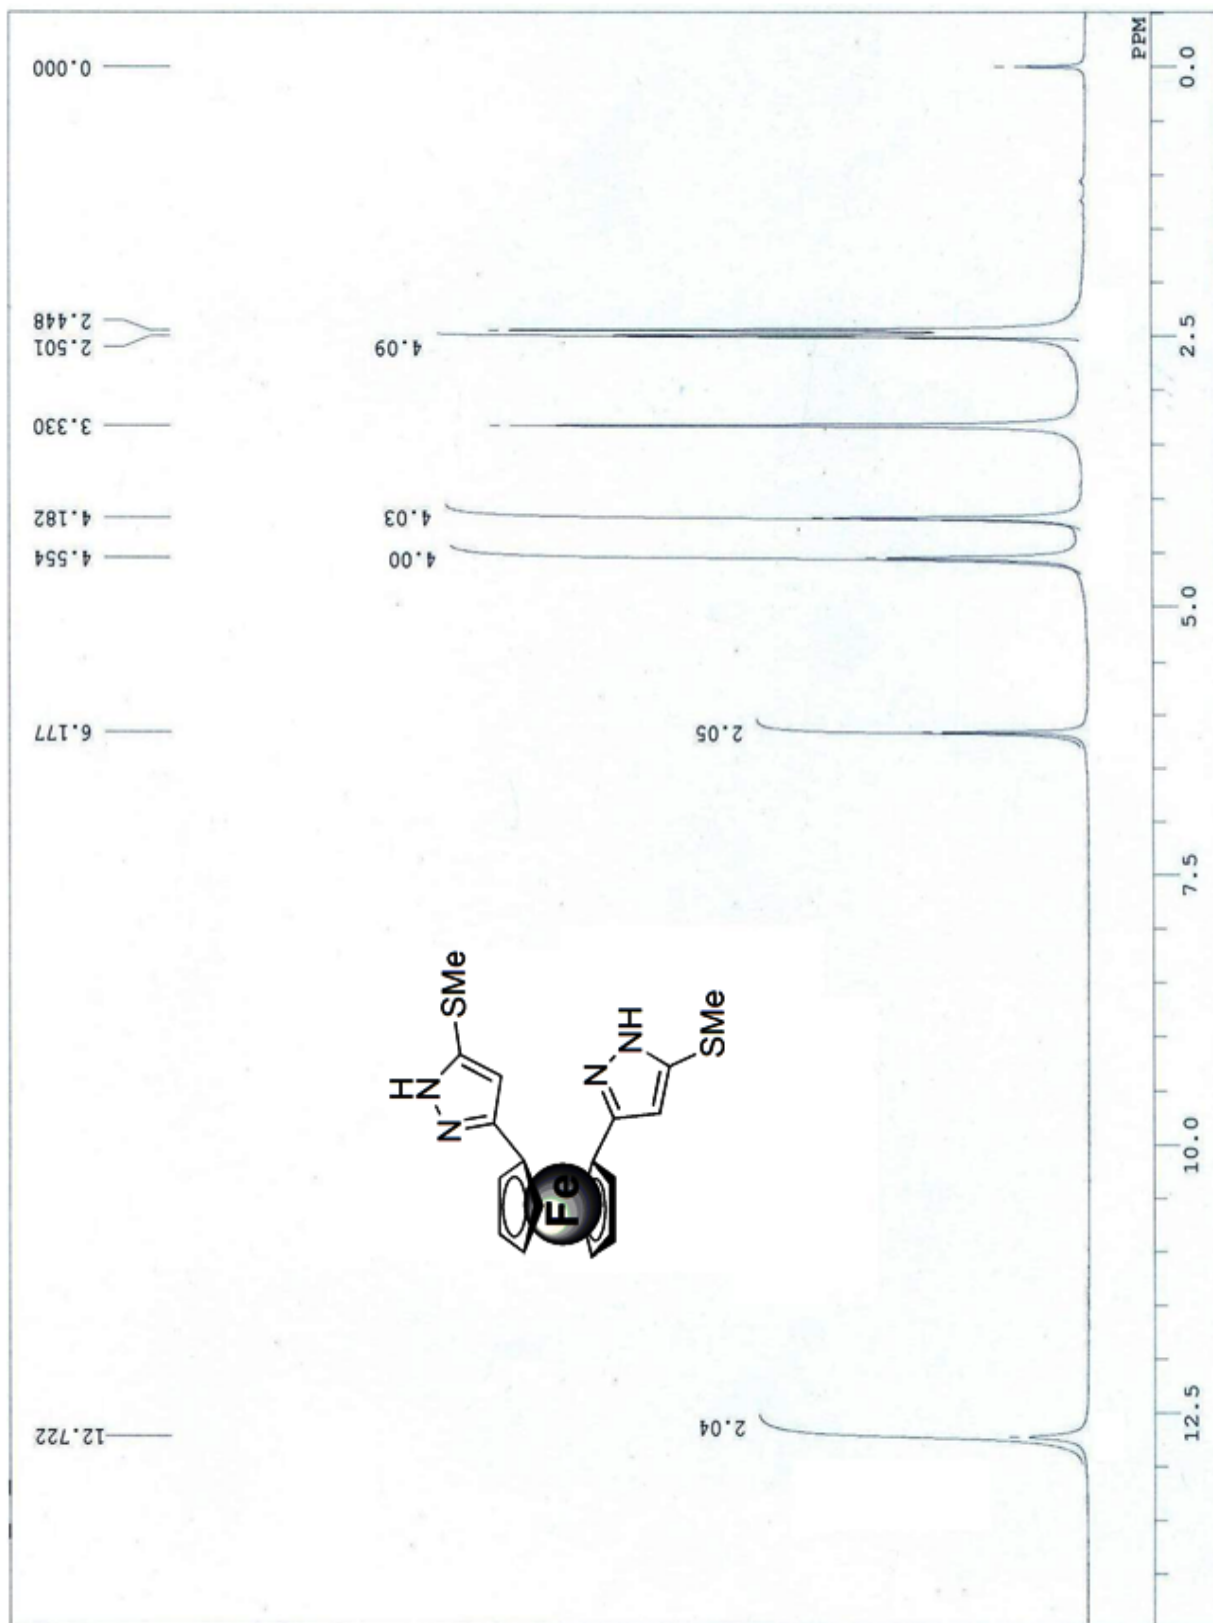

$^{13}\text{C}$  NMR Spectrum of 1,1'-Bis(3-methylsulfanyl-pyrazole-5-yl)ferrocene **5**

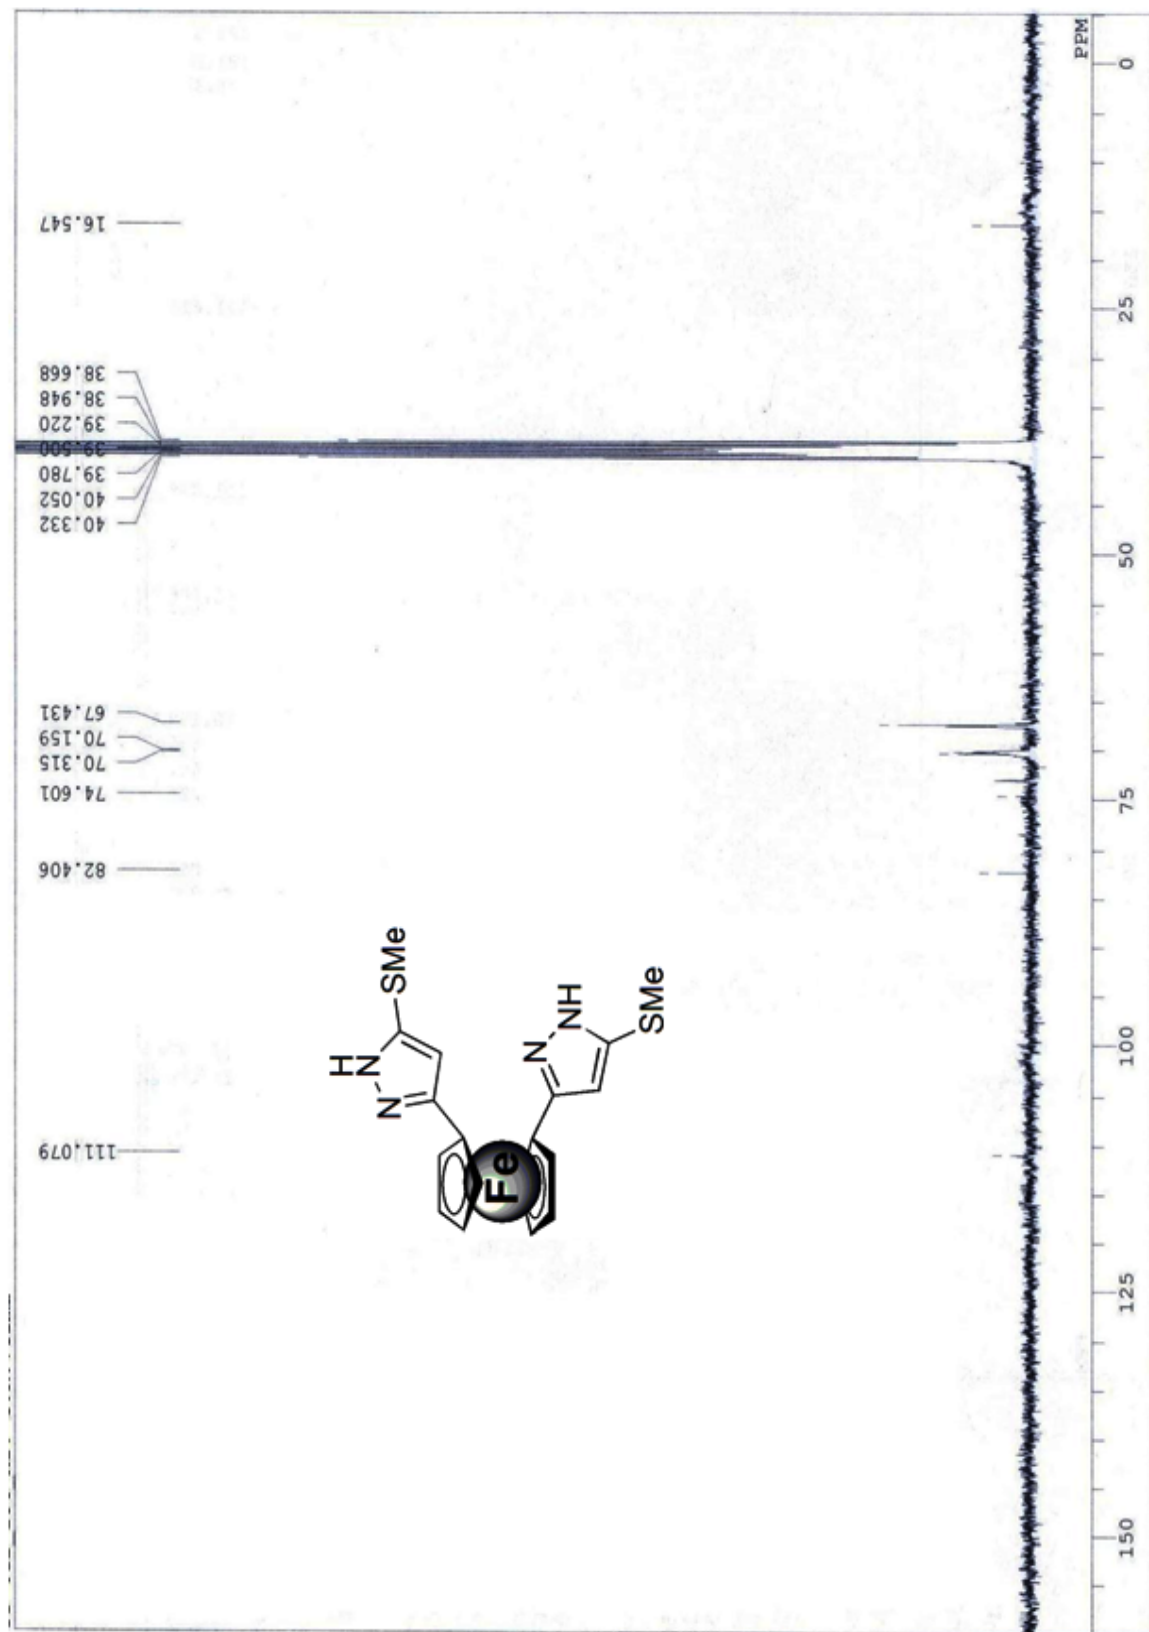

### HRMS Spectrum of 1,1'-Bis(3-methylsulfanyl-pyrazole-5-yl)ferrocene 5

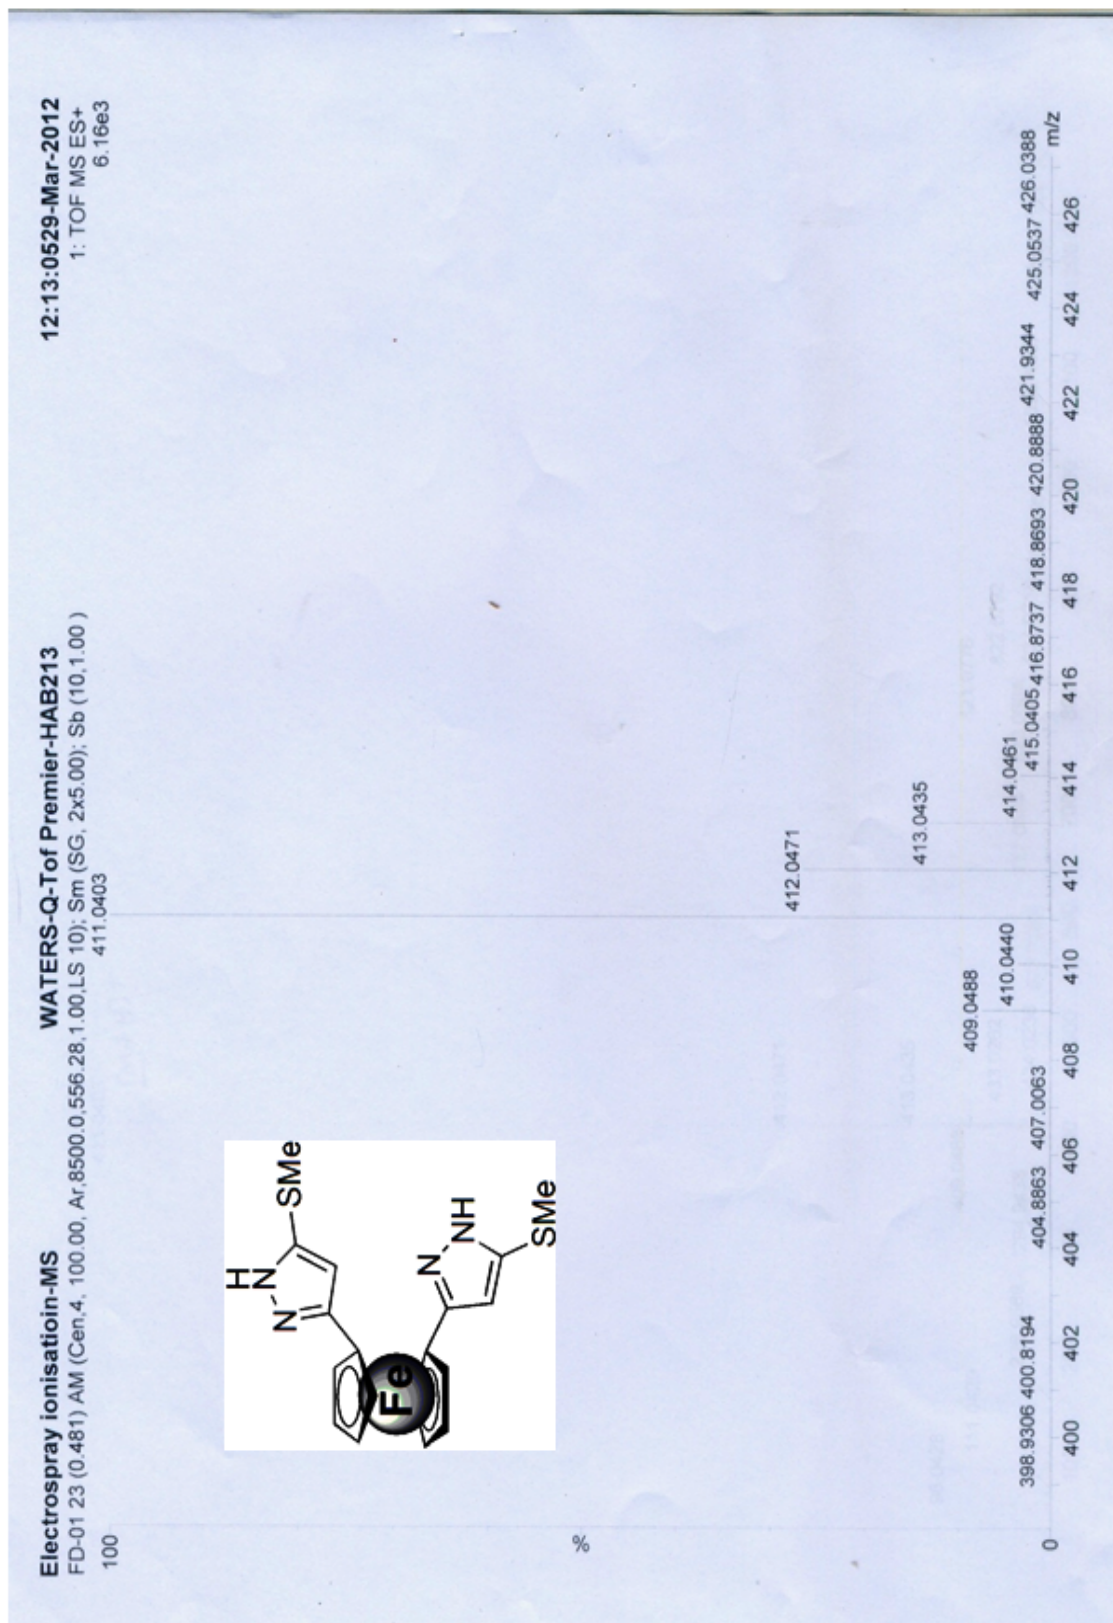

<sup>1</sup>H NMR Spectrum of 1,1'-Bis(5-methylsulfanyl-1-phenyl-pyrazole-3-yl)ferrocene 6

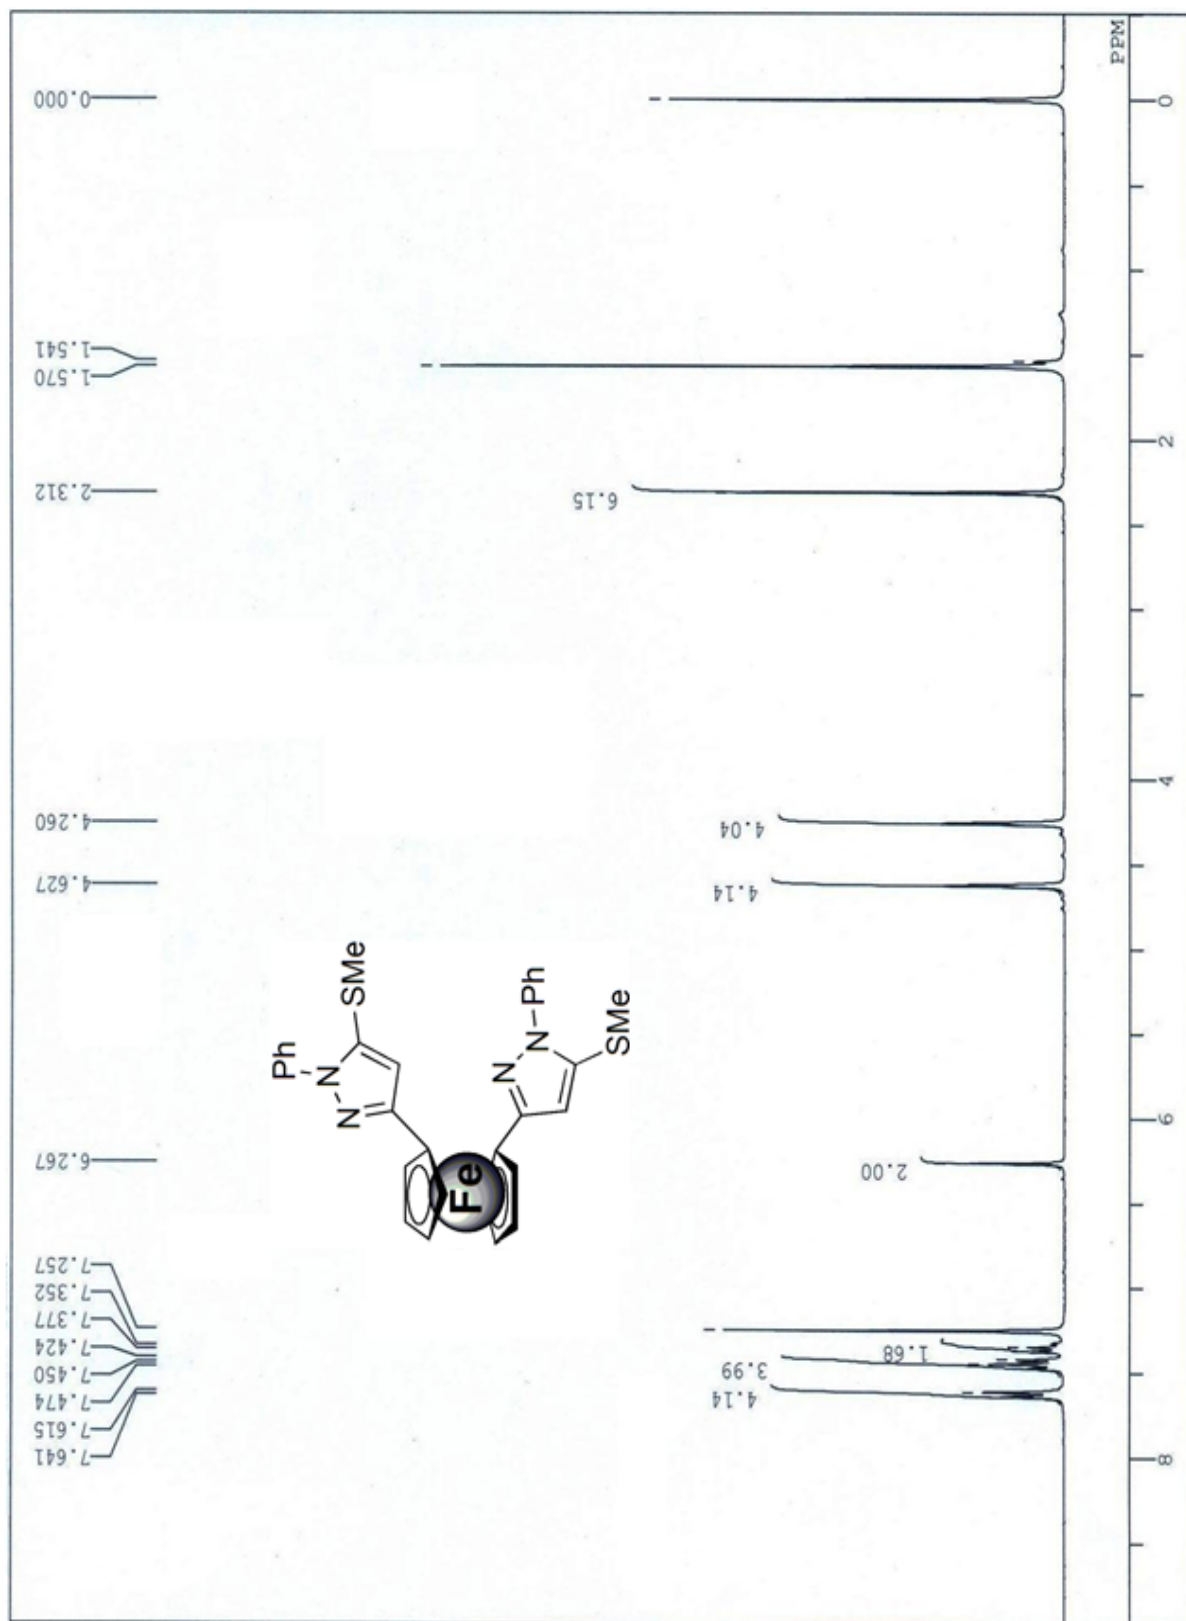

$^{13}\text{C}$  NMR Spectrum of 1,1'-Bis(5-methylsulfanyl-1-phenyl-pyrazole-3-yl)ferrocene **6**

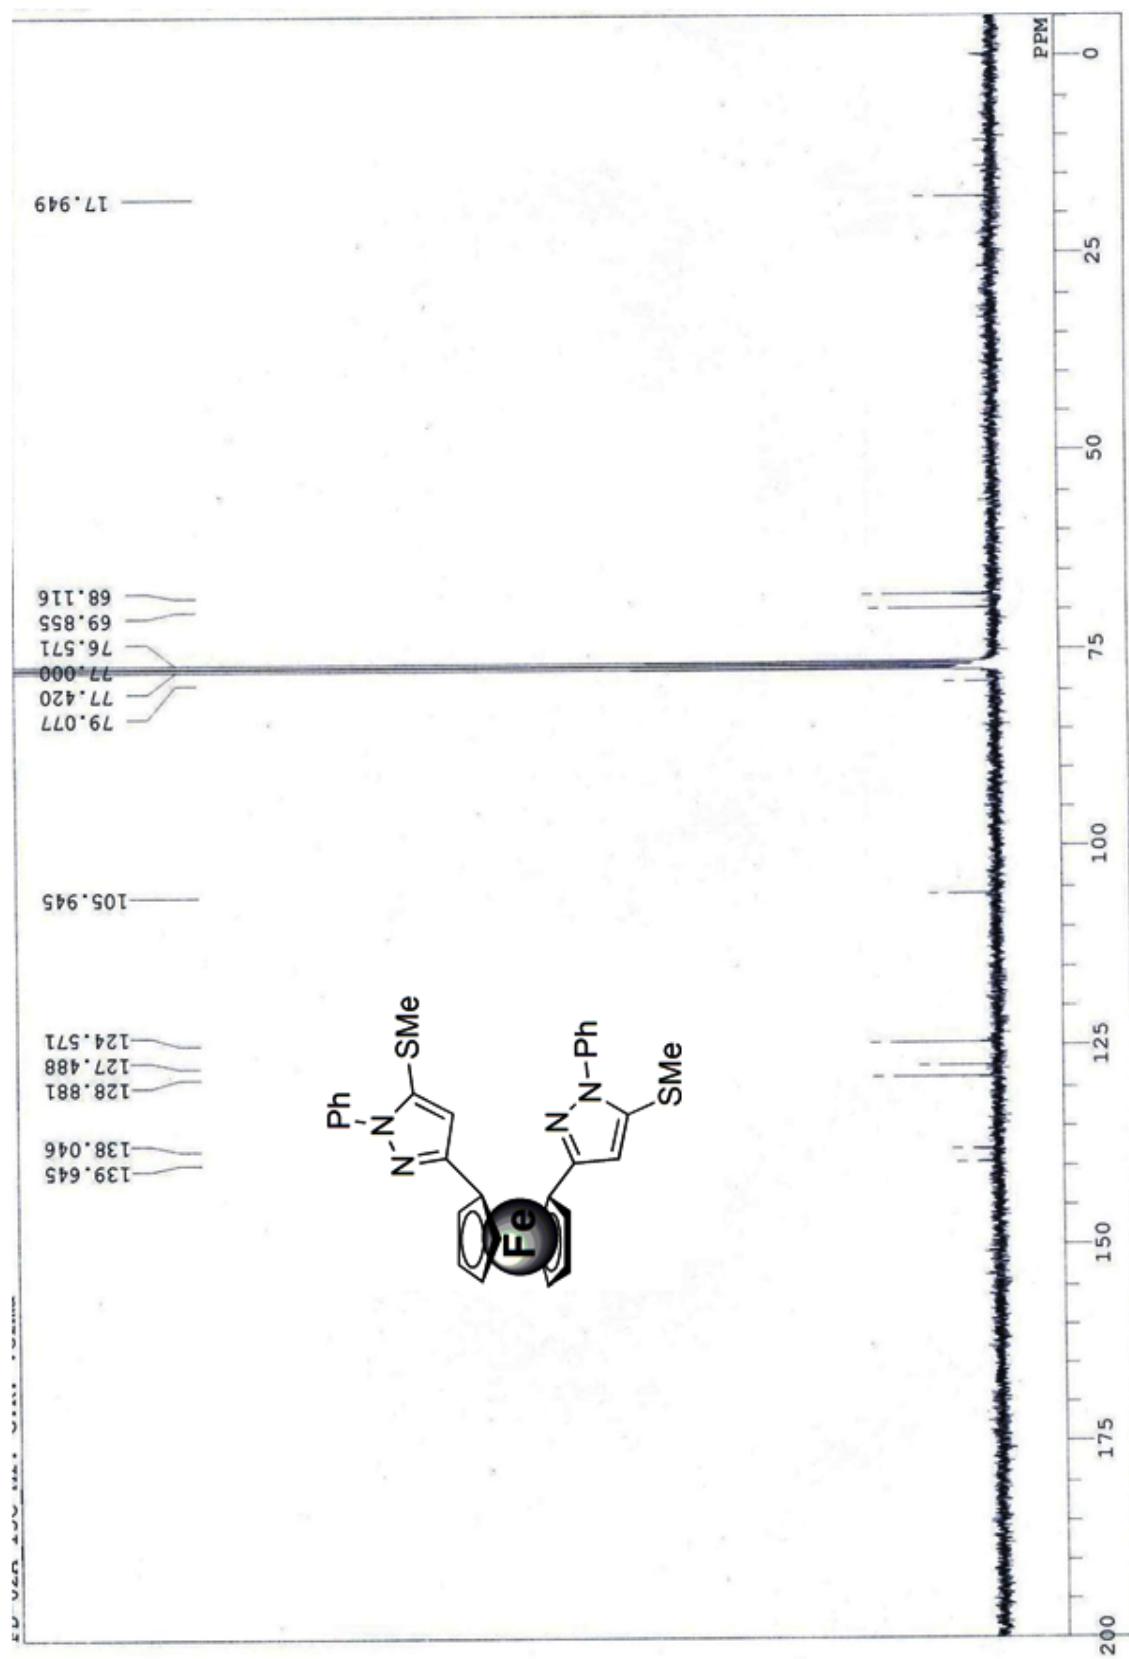

HRMS Spectrum of 1,1'-Bis(5-methylsulfanyl-1-phenyl-pyrazole-3-yl)ferrocene **6**

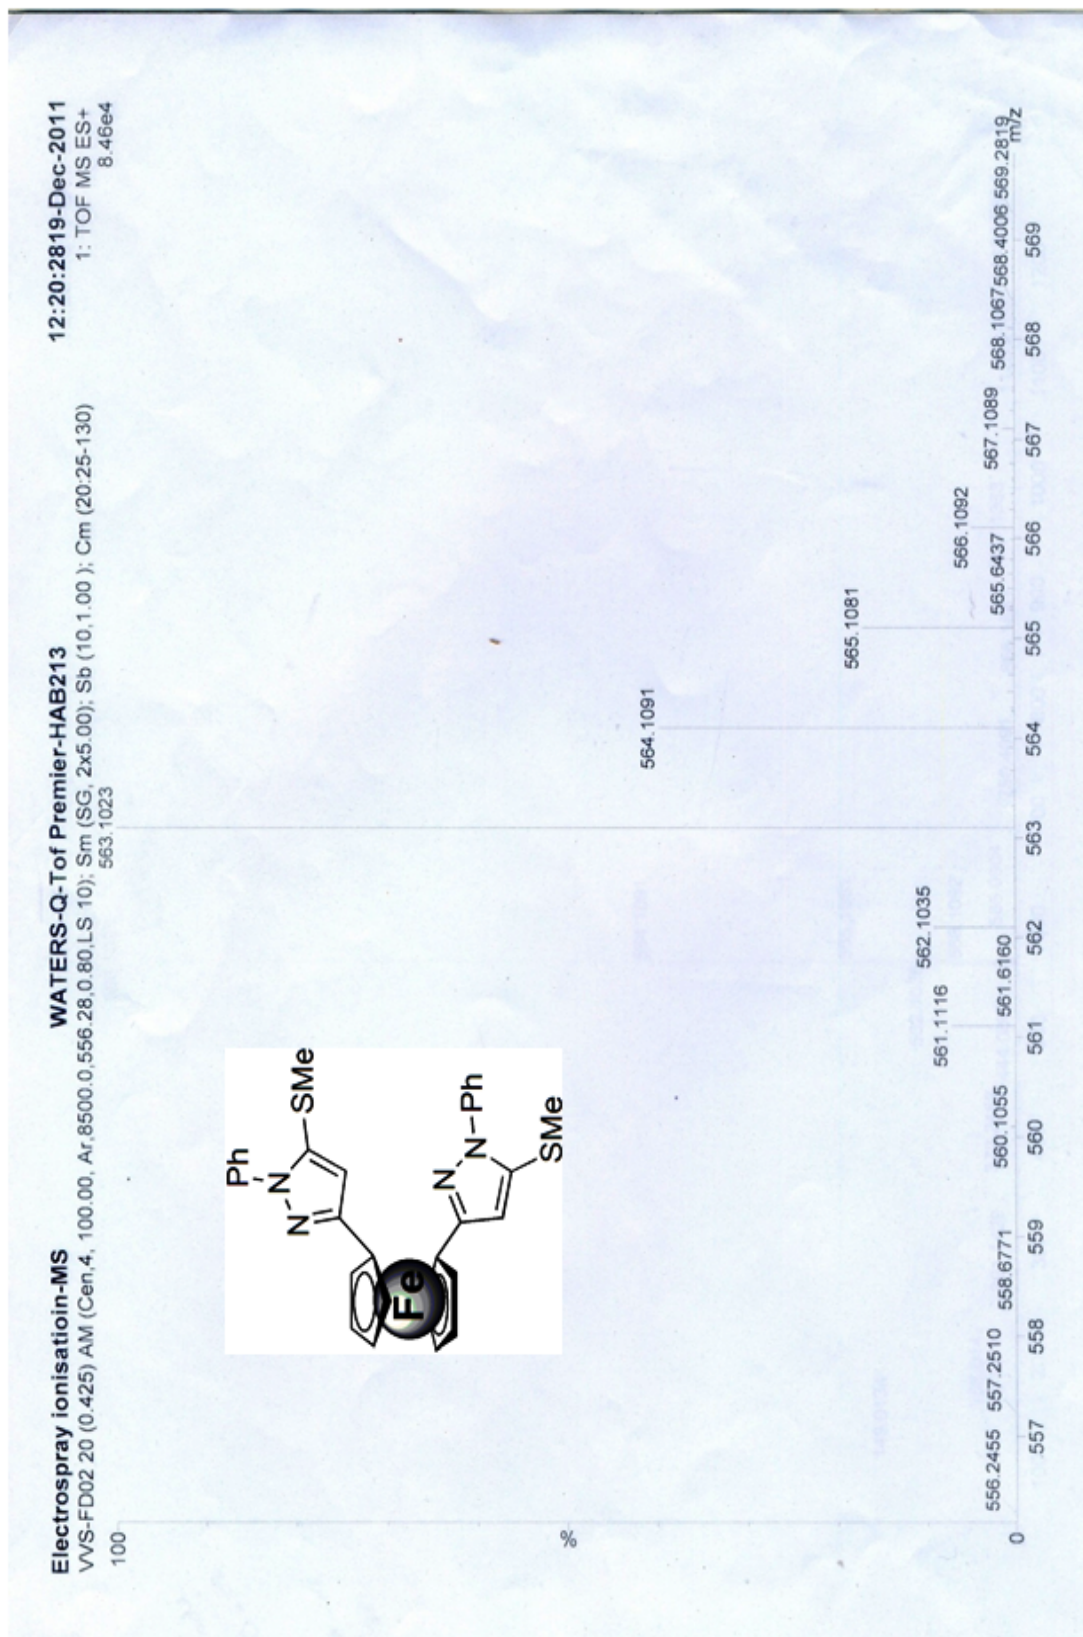

<sup>1</sup>H NMR Spectrum of 1,1'-Bis(5-methylsulfanyl-isoxazole-3-yl)ferrocene 7

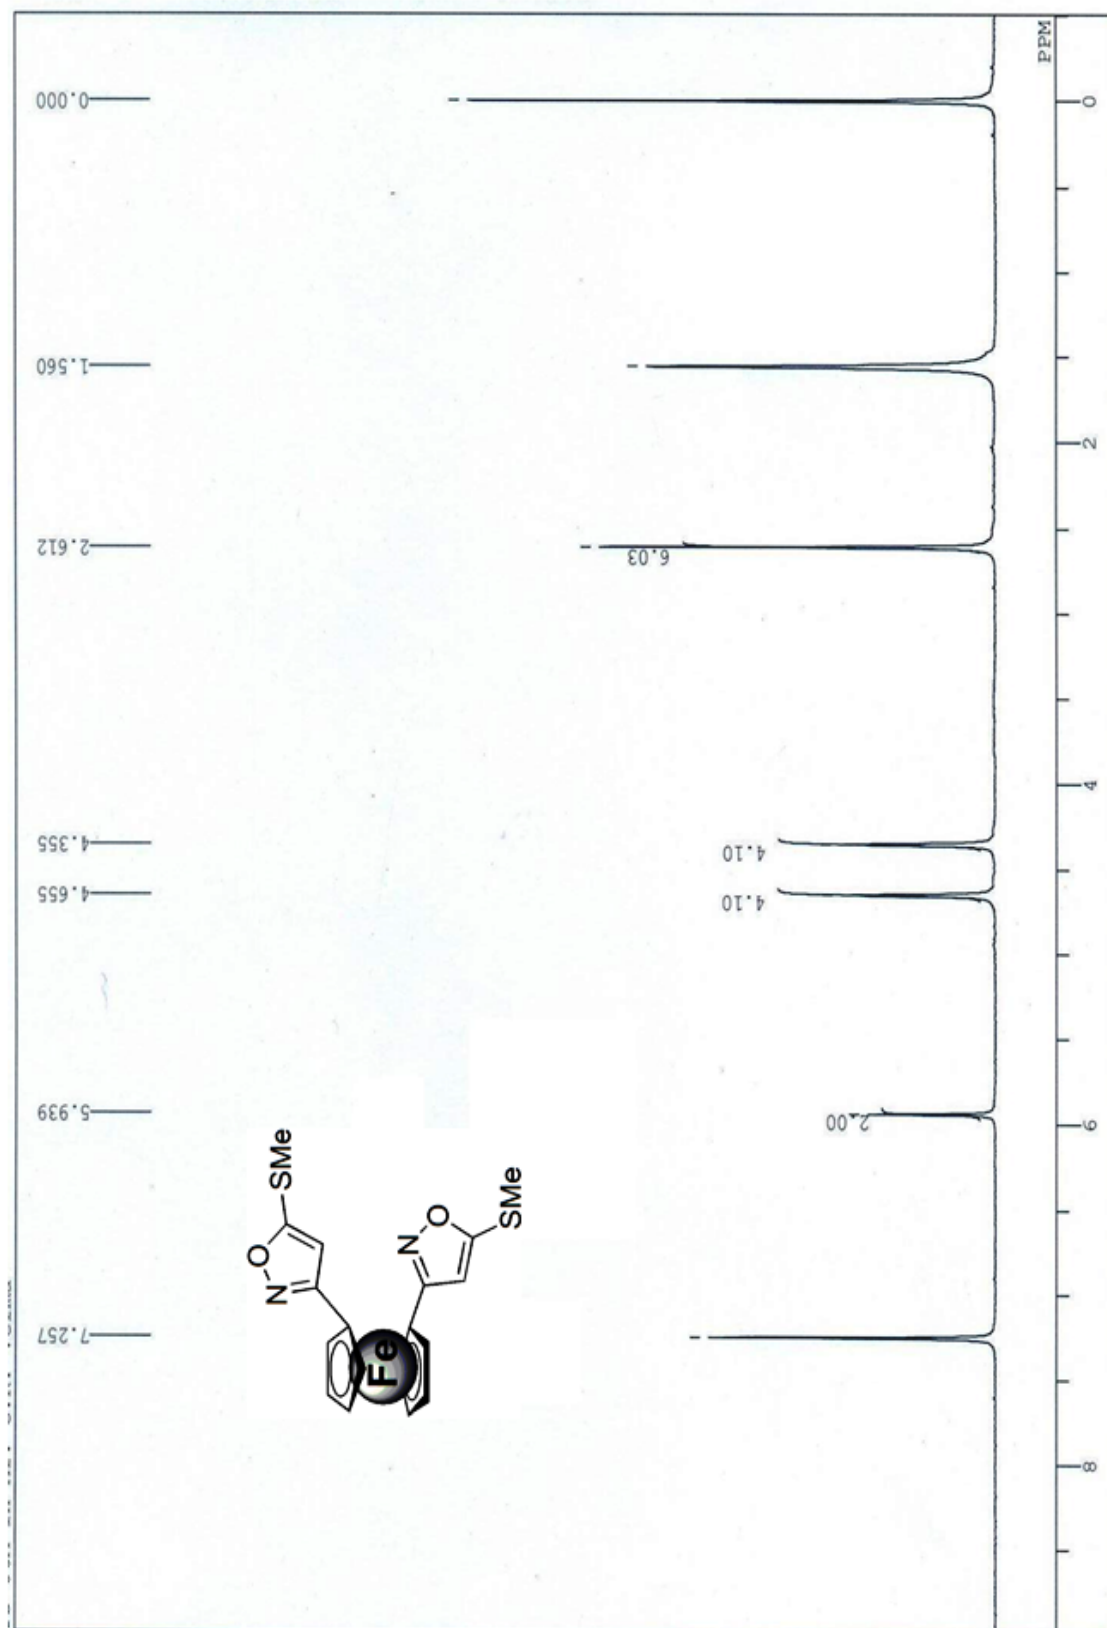



$^{13}\text{C}$  NMR Spectrum of 1,1'-Bis(5-methylsulfanyl-isoxazole-3-yl)ferrocene 7

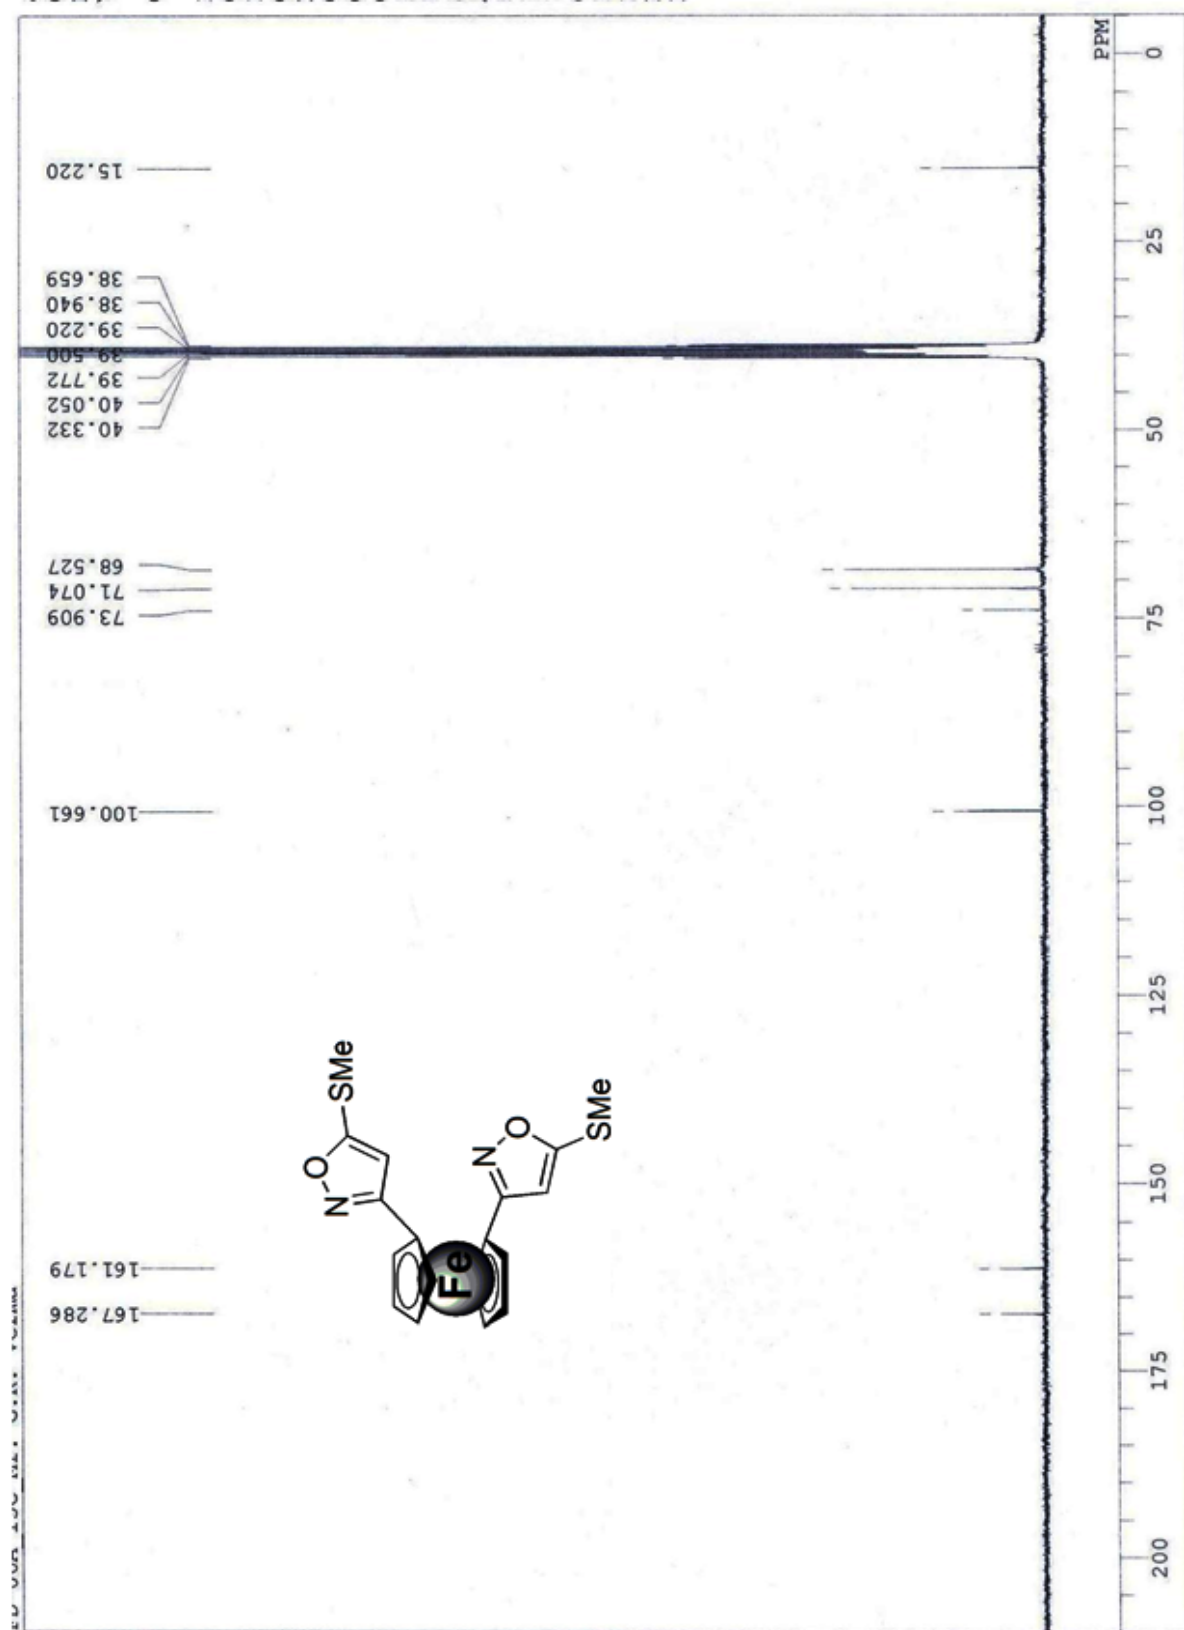

### HRMS Spectrum of 1,1'-Bis(5-methylsulfanyl-isoxazole-3-yl)ferrocene 7

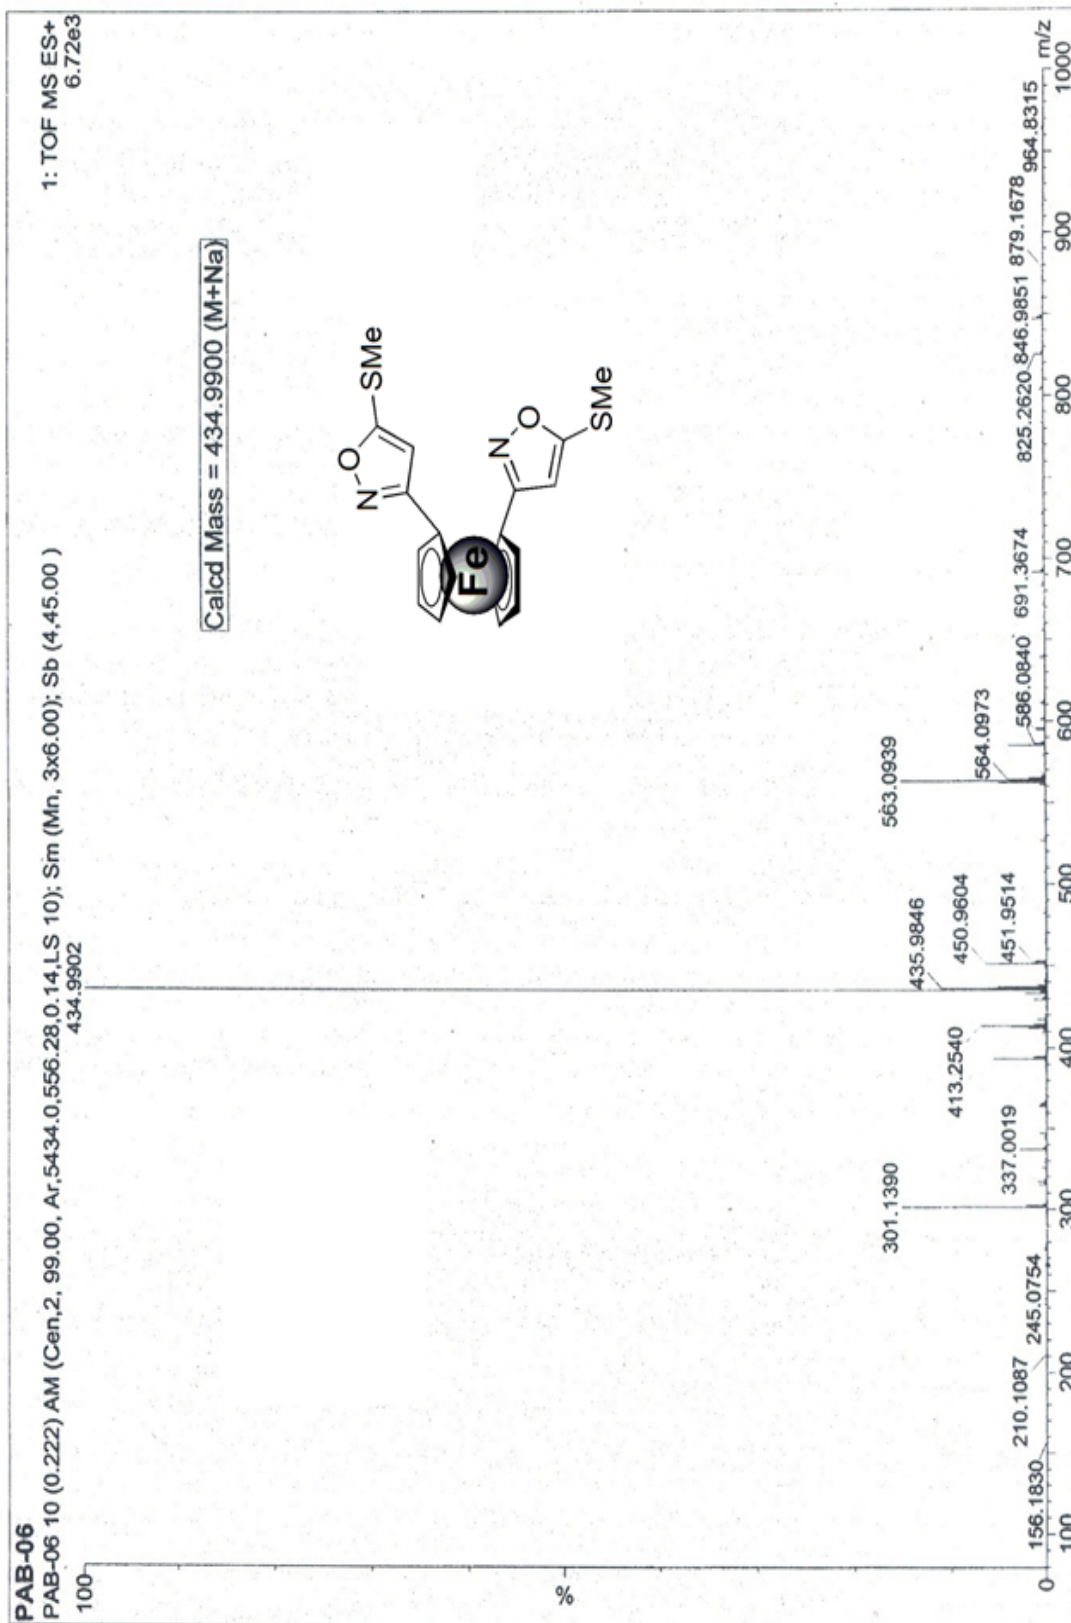

<sup>1</sup>H NMR Spectrum of 1,1'-Bis(5-methylsulfanyl-2-carboethoxy-thiophene-3-yl)ferrocene 9

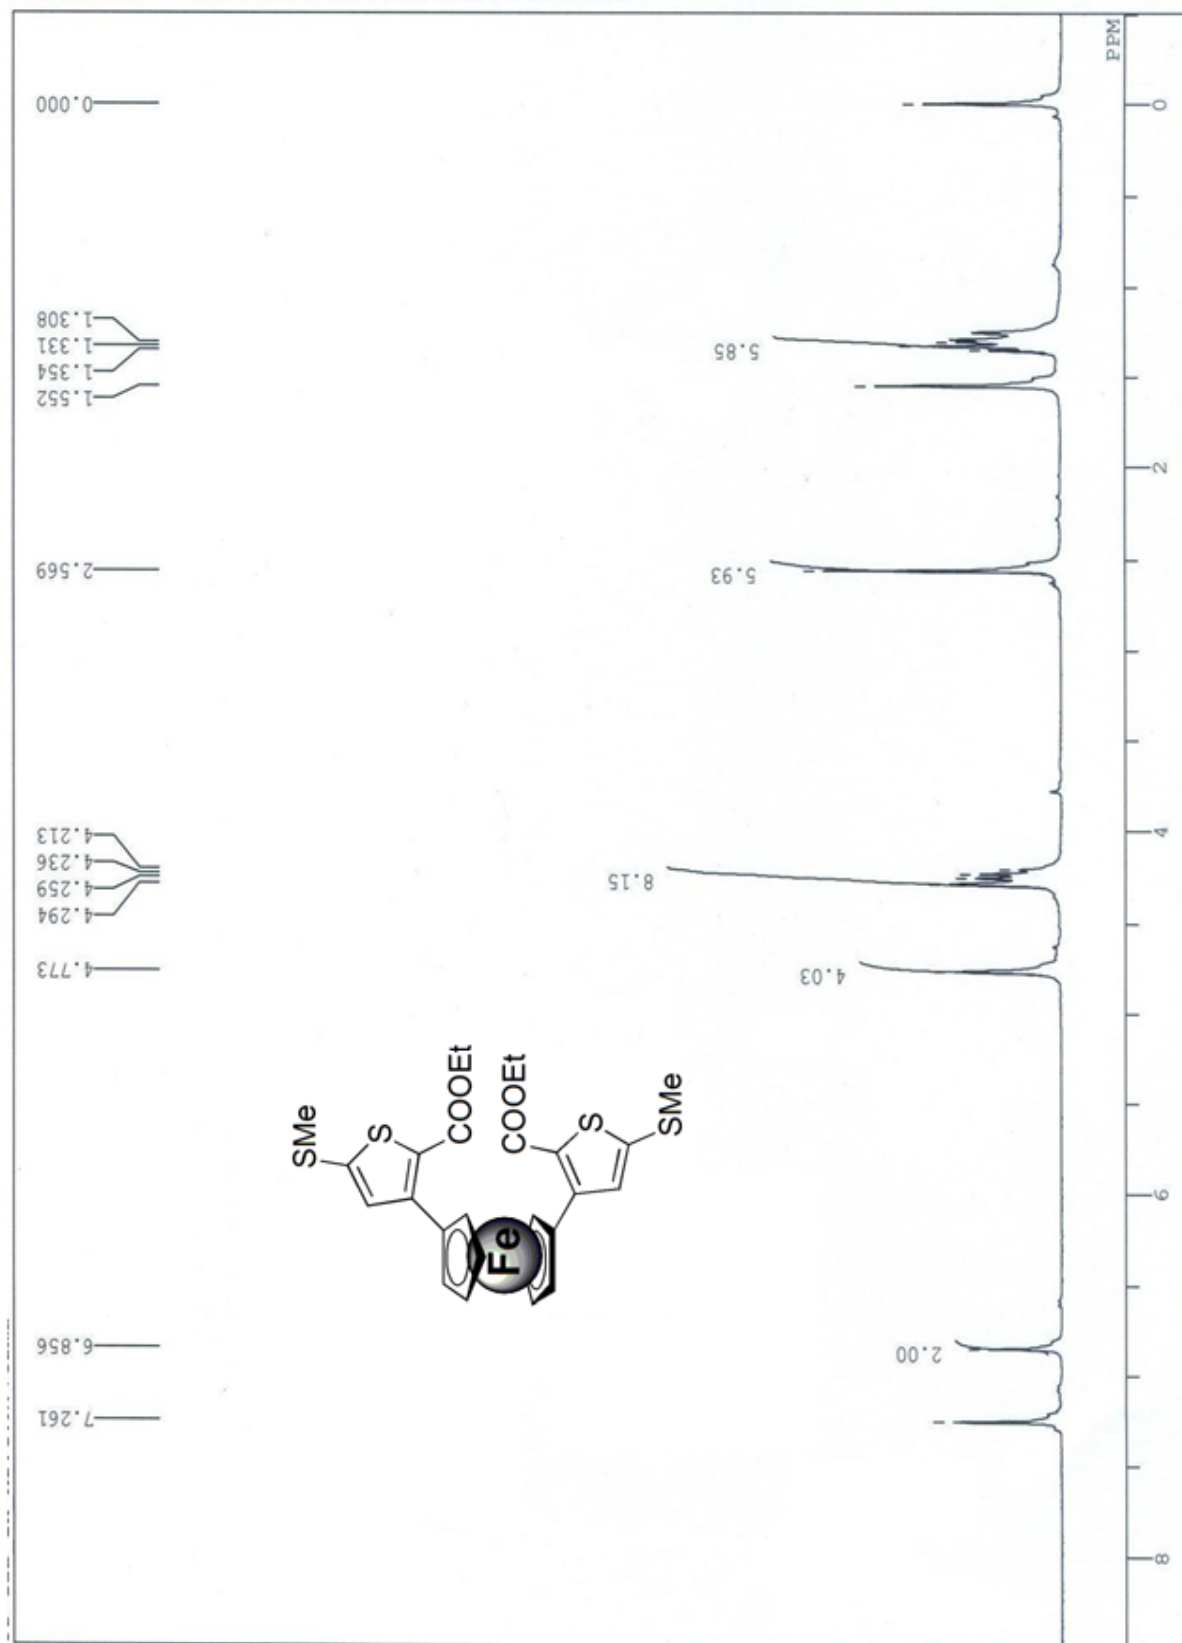

$^{13}\text{C}$  NMR Spectrum of 1,1'-Bis(5-methylsulfanyl-2-carboethoxy-thiophene-3-yl)ferrocene **9**

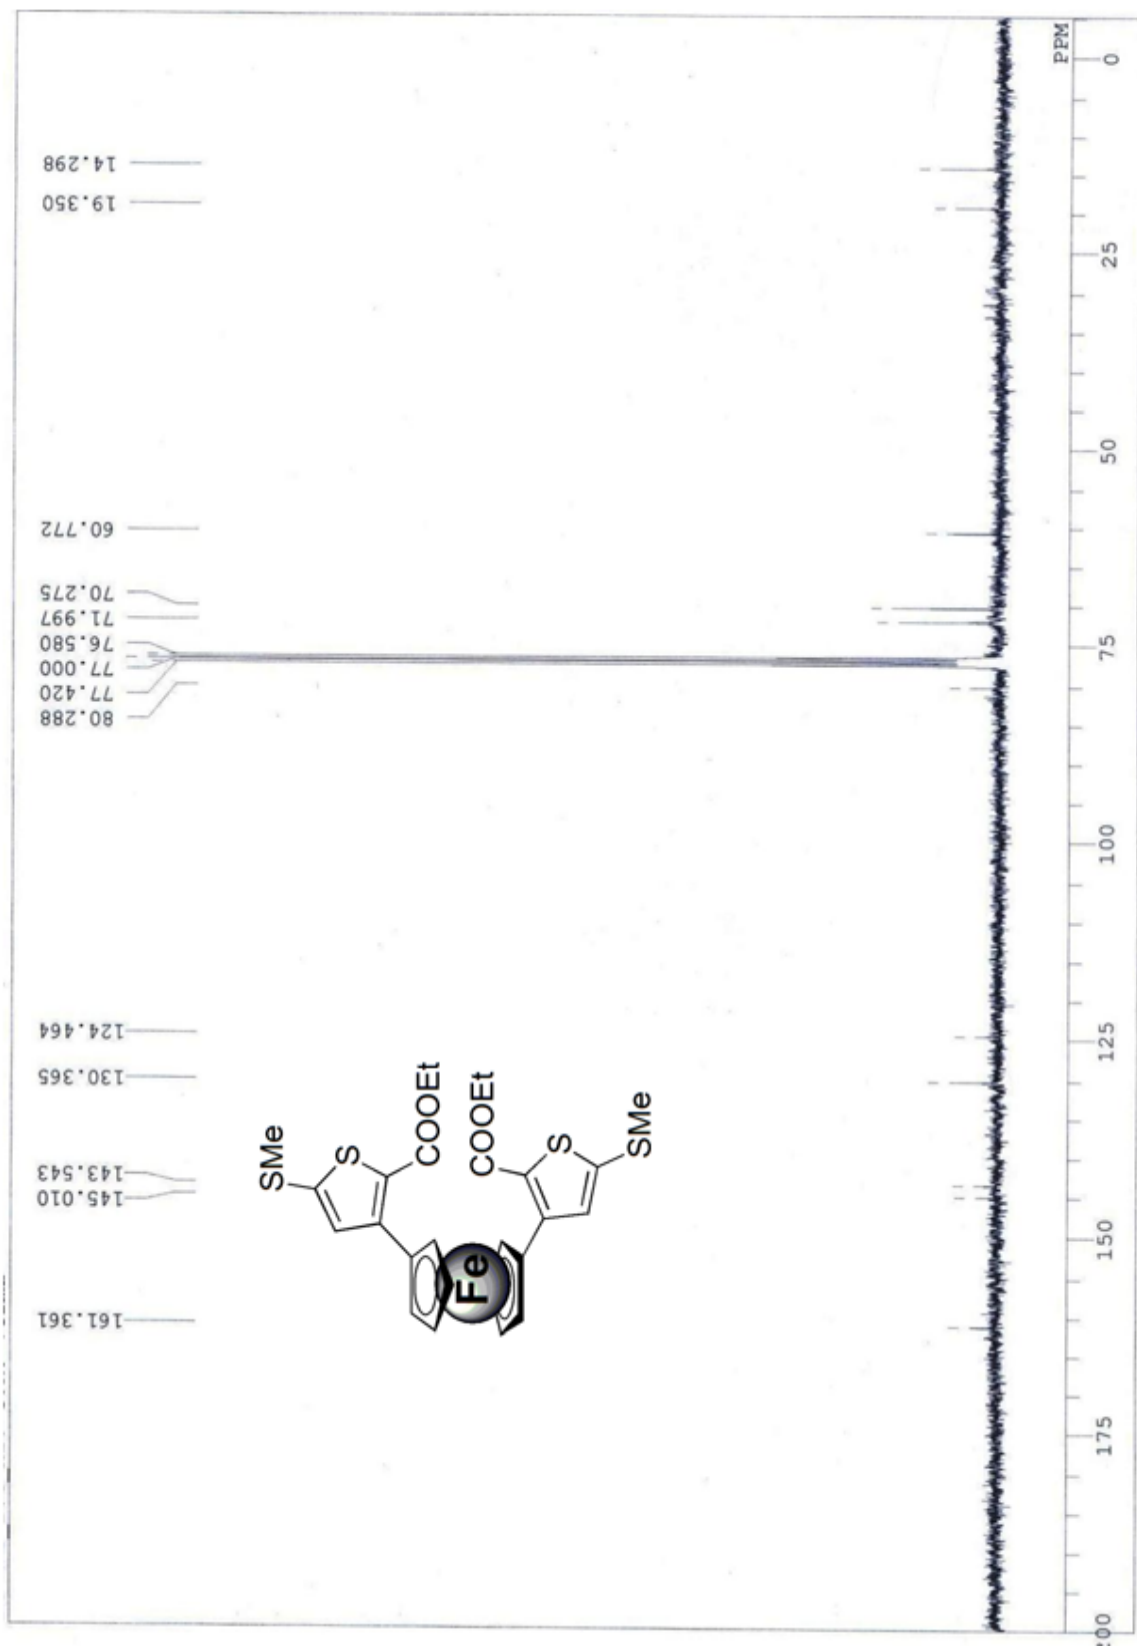

HRMS Spectrum of 1,1'-Bis(5-methylsulfanyl-2-carboethoxy-thiophene-3-yl)ferrocene 9

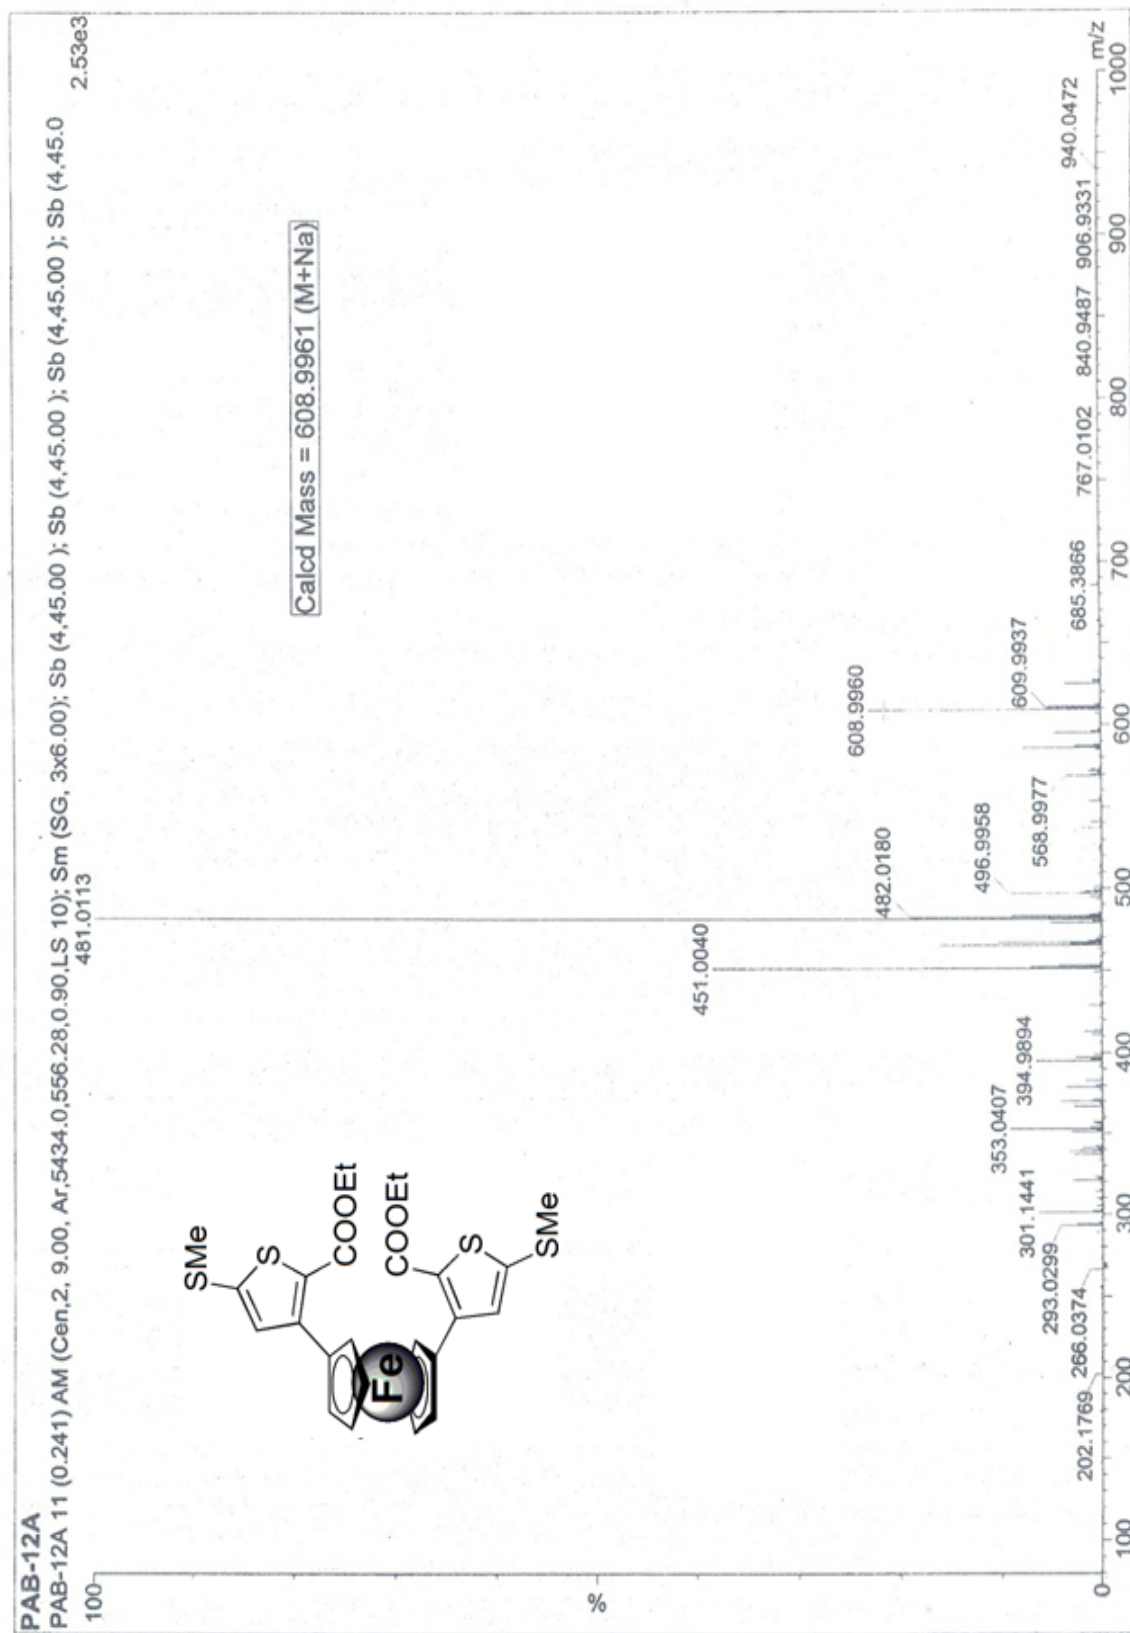

<sup>1</sup>H NMR Spectrum of 1,1'-Bis(2-(4-Chlorobenzoyl)-5-methylsulfanyl-thiophene-3-yl)ferrocene 10

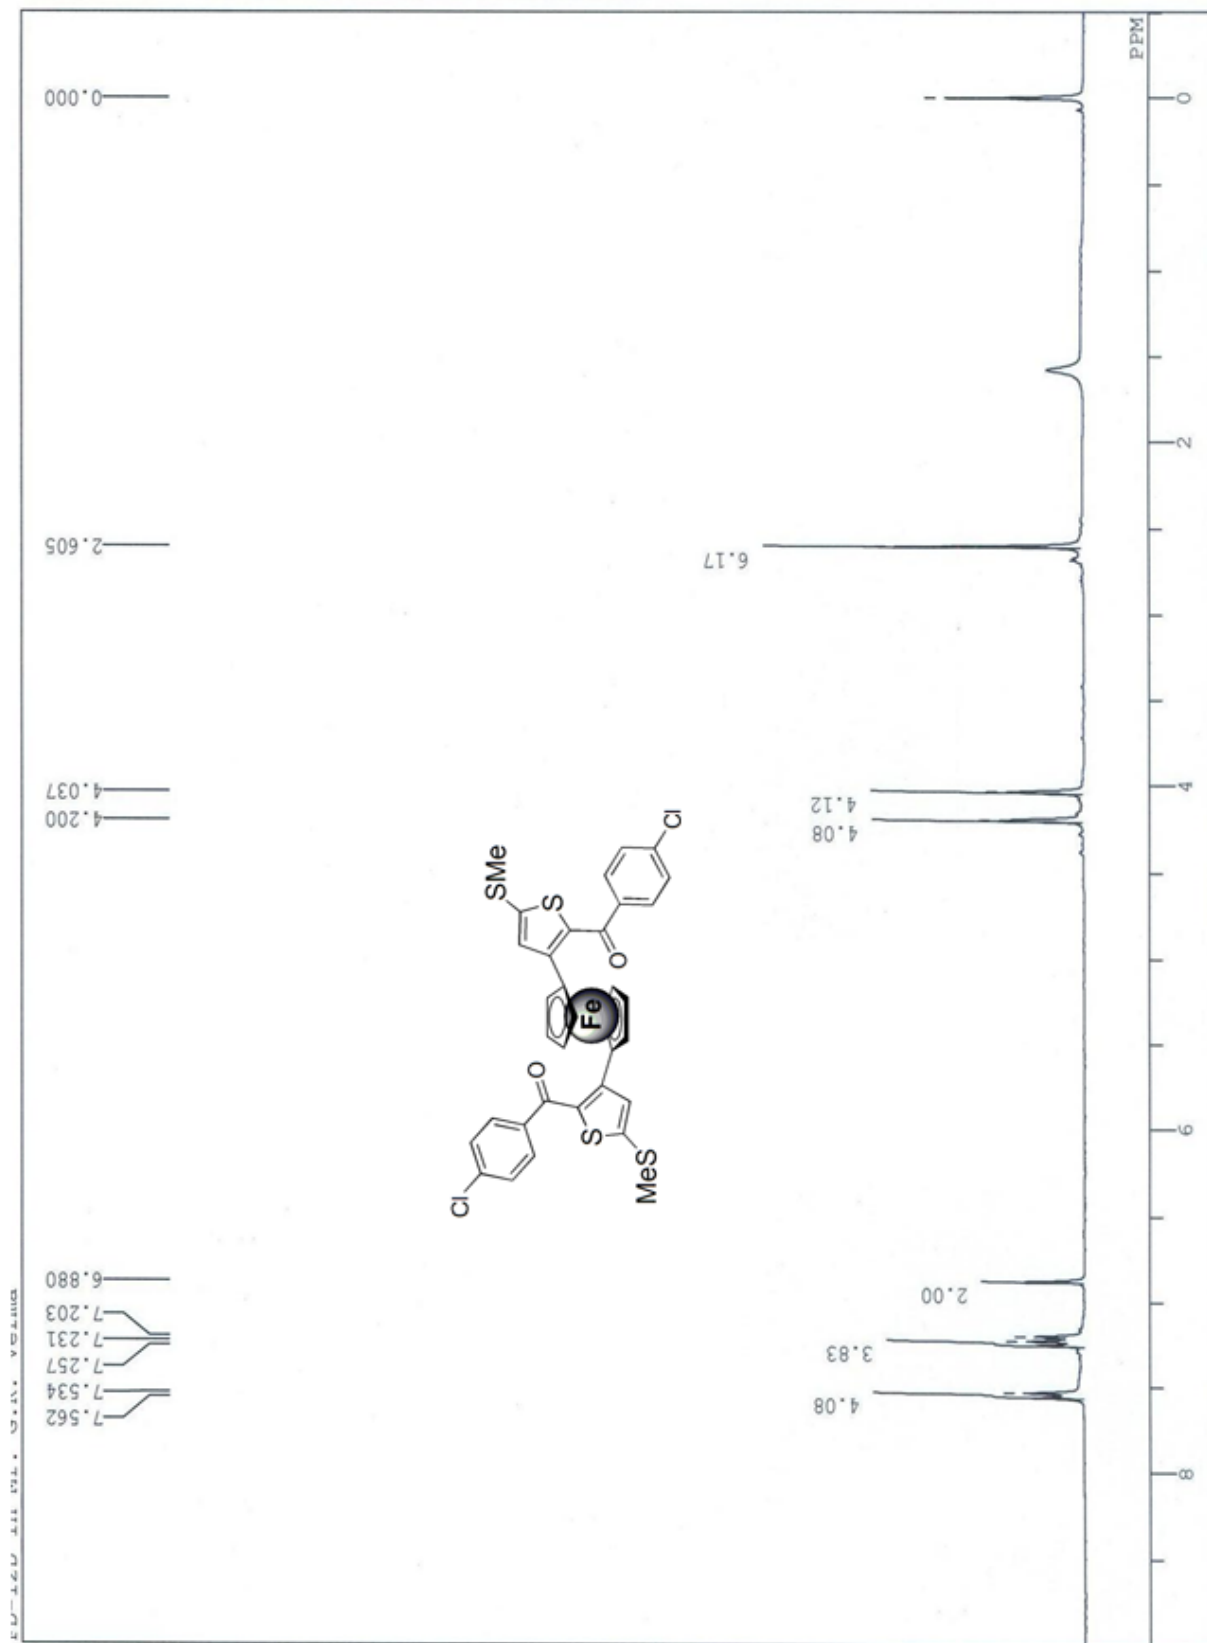

$^{13}\text{C}$  NMR Spectrum of 1,1'-Bis(2-(4-Chlorobenzoyl)-5-methylsulfanyl-thiophene-3-yl)ferrocene 10

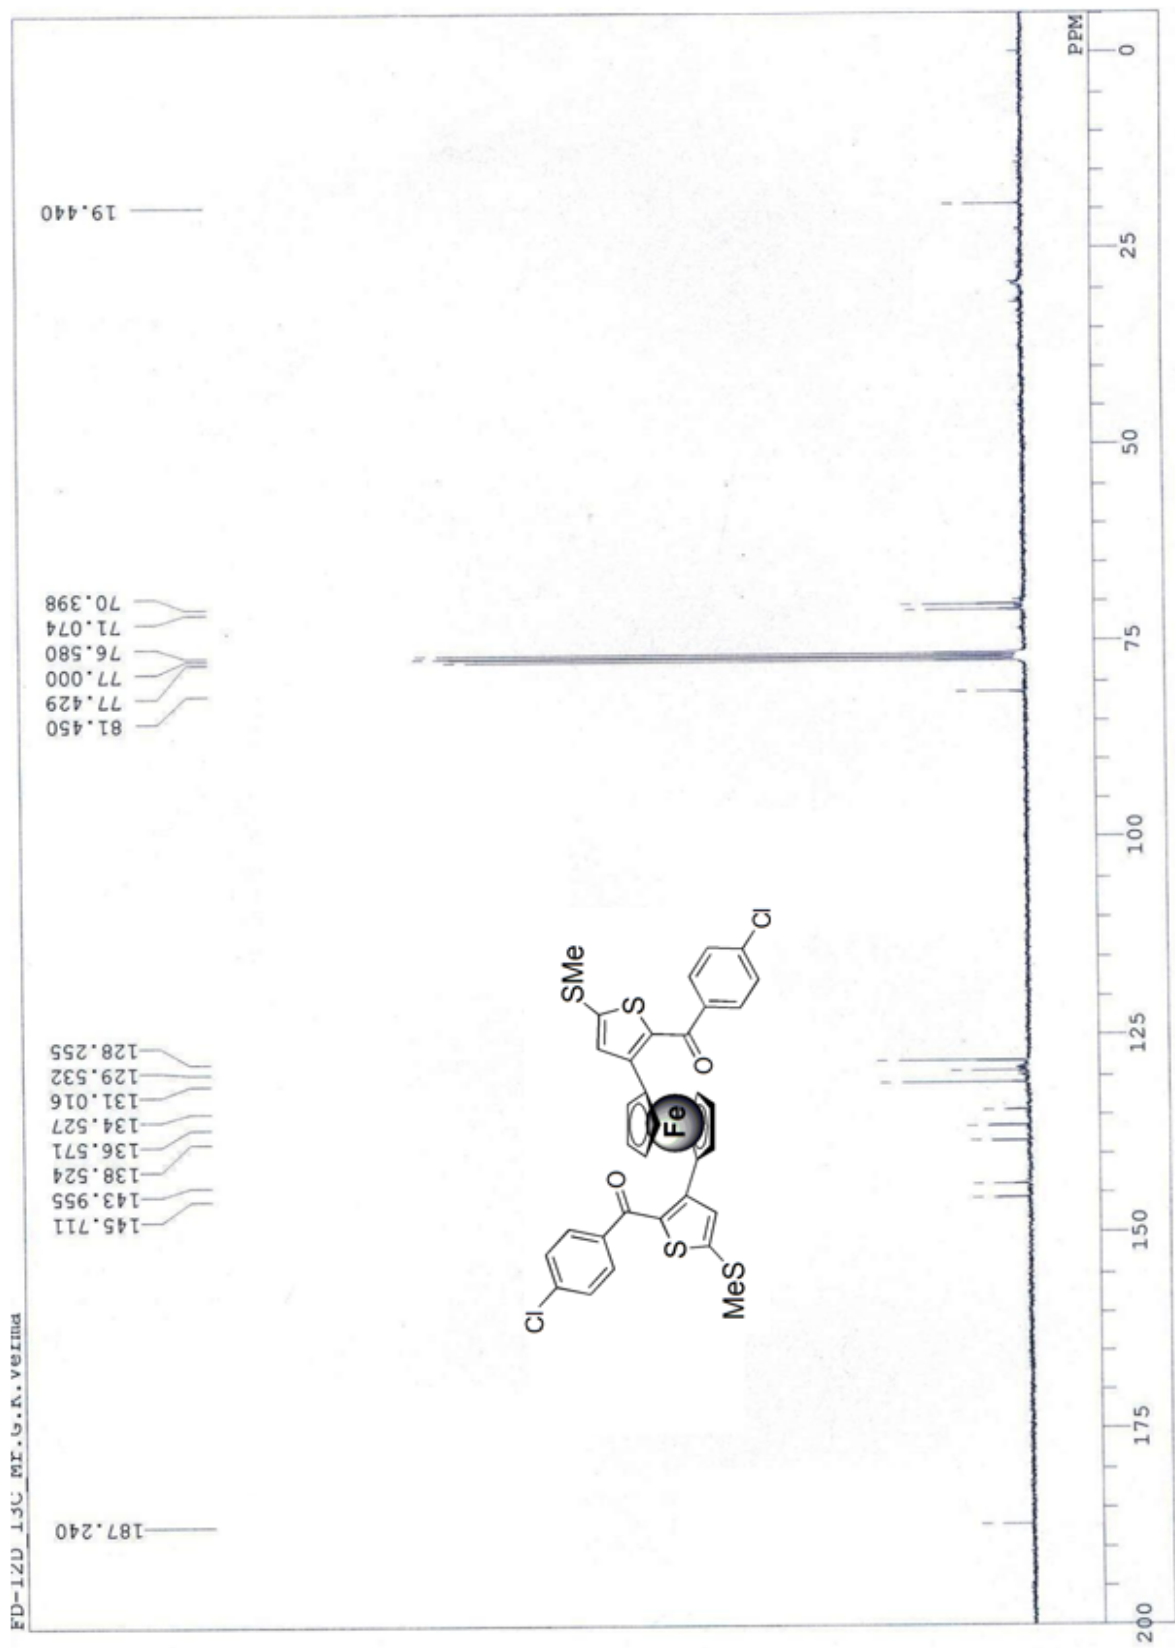

Elemental Composition Report

Single Mass Analysis (displaying only valid results)

Tolerance = 5.0 PPM / DBE: min = -1.5, max = 100.0

Isotope cluster parameters: Separation = 1.0 Abundance = 1.0%

Monoisotopic Mass, Odd and Even Electron Ions

84 formula(e) evaluated with 1 results within limits (up to 50 closest results for each mass)

Micromass : Q-ToF micro (YA-105)  
 C34H24Cl2FeO2S4

Dept. Of Chemistry I.I.T.(B)

11-Feb-2012 16:20:45

INN-FD-12D 17 (0.170) AM (Cen.5, 80.00, Ar.5000.0,556.28,1.00); Sb (5,40.00 ); Cm (10:44)

TOF MS ES+  
 3.38e4

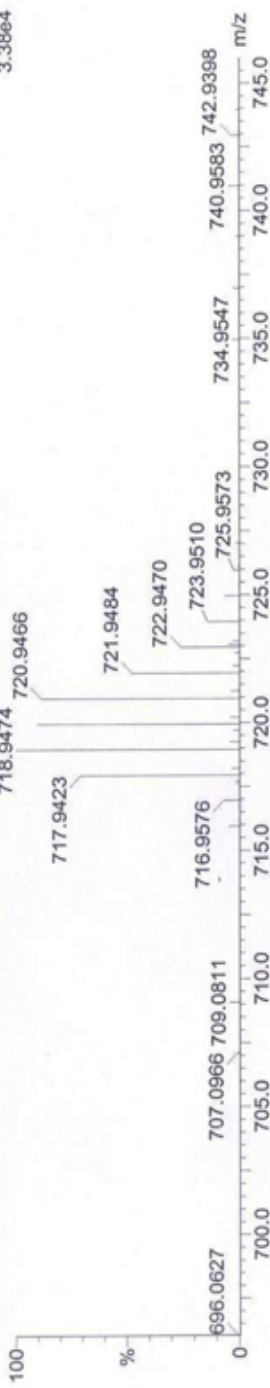

Minimum:  
 Maximum:

-1.5  
 100.0

| Mass     | Calc. Mass | mDa | PPM | DBE  | Score | Formula              |
|----------|------------|-----|-----|------|-------|----------------------|
| 718.9474 | 718.9464   | 1.0 | 1.4 | 21.5 | 1     | C34 H25 O2 Cl2 S4 Fe |

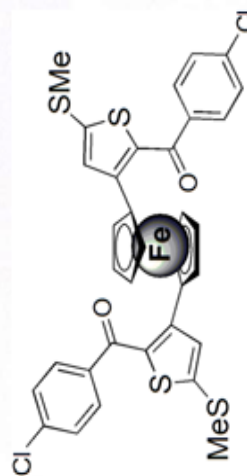



# LC-HRMS Spectrum of 1,1'-Bis(2-amino-4-methylsulfanyl-pyrimidine-6-yl)ferrocene 11

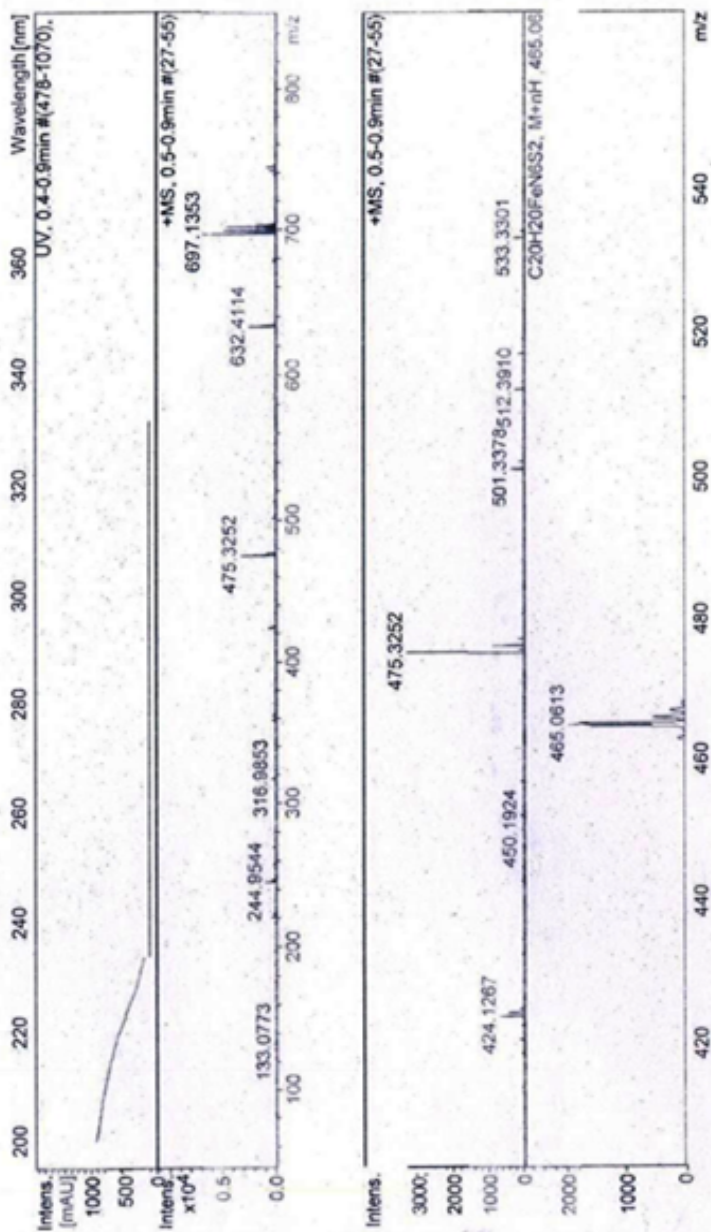

Bruker Compass DataAnalysis 4.0 printed: 2/21/2012 3:52:03 PM Page 1 of 1

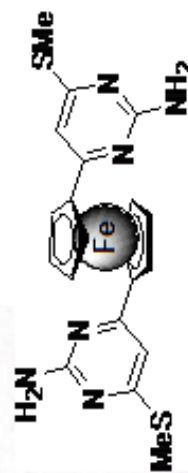

<sup>1</sup>H NMR Spectrum of 1,1'-Bis(6-bromochromene-3-carbonyl)ferrocene 12

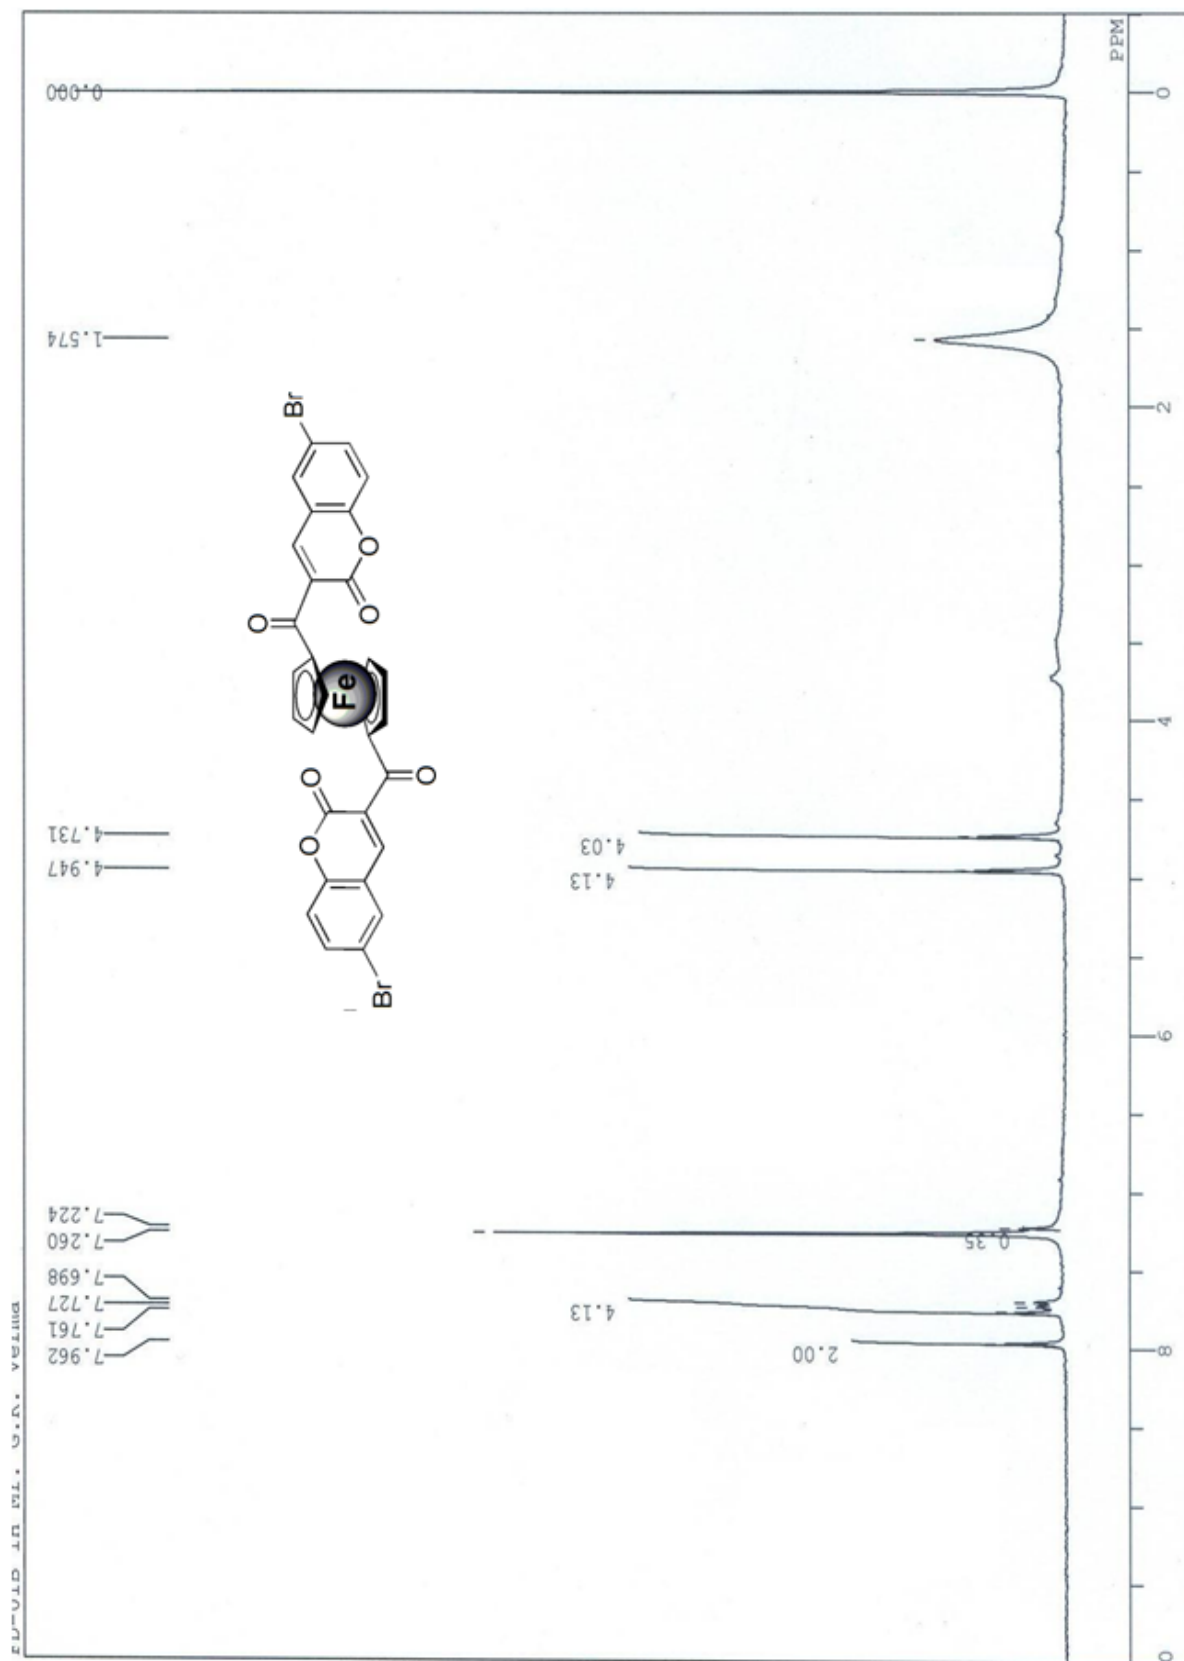

$^{13}\text{C}$  NMR Spectrum of 1,1'-Bis(6-bromochromene-3-carbonyl)ferrocene 12

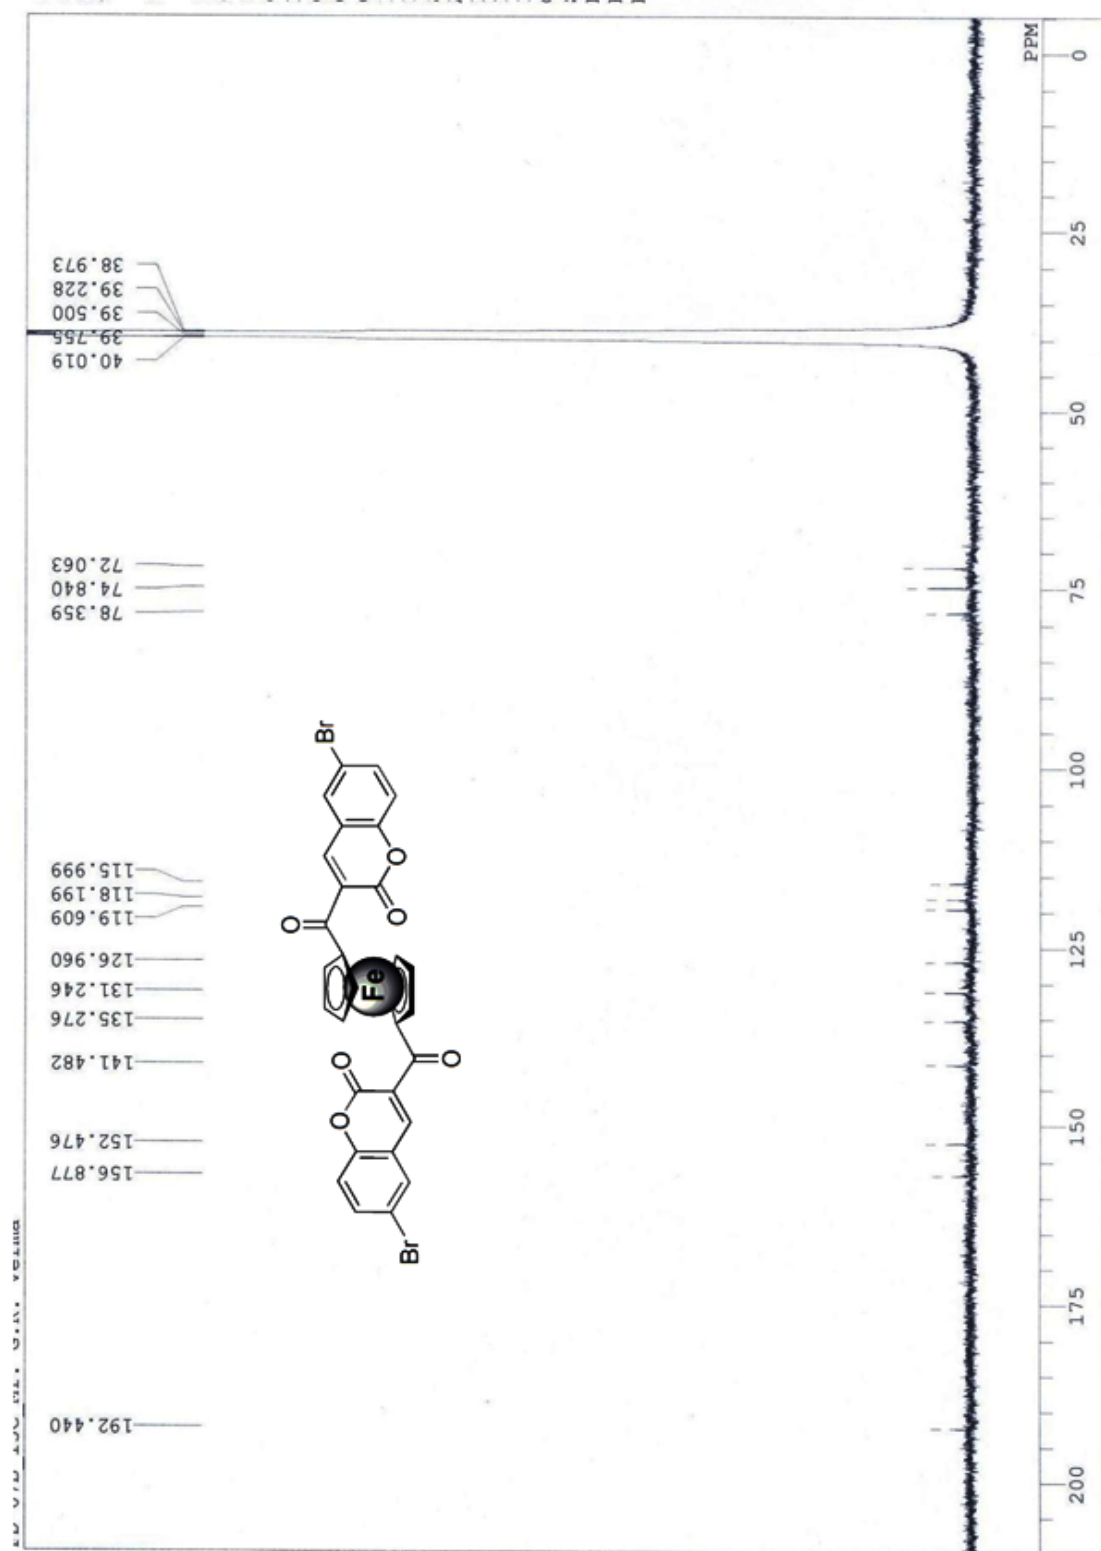

# HRMS Spectrum of 1,1'-Bis(6-bromochromene-3-carbonyl)ferrocene 12

16:09:5927-Jan-2012  
1: TOF MS ES+  
924

WATERS-Q-ToF Premier-HAB213  
Cm (2:13-72.91)  
710.8624

Electrospray ionisation-MS  
FD-07 9 (0.233) AM (Cen.4, 100.00, Ar, 10000.0, 556.28, 1.20, LS 10); Sm (SG, 2x5.00); Sb (10, 1.00);

100

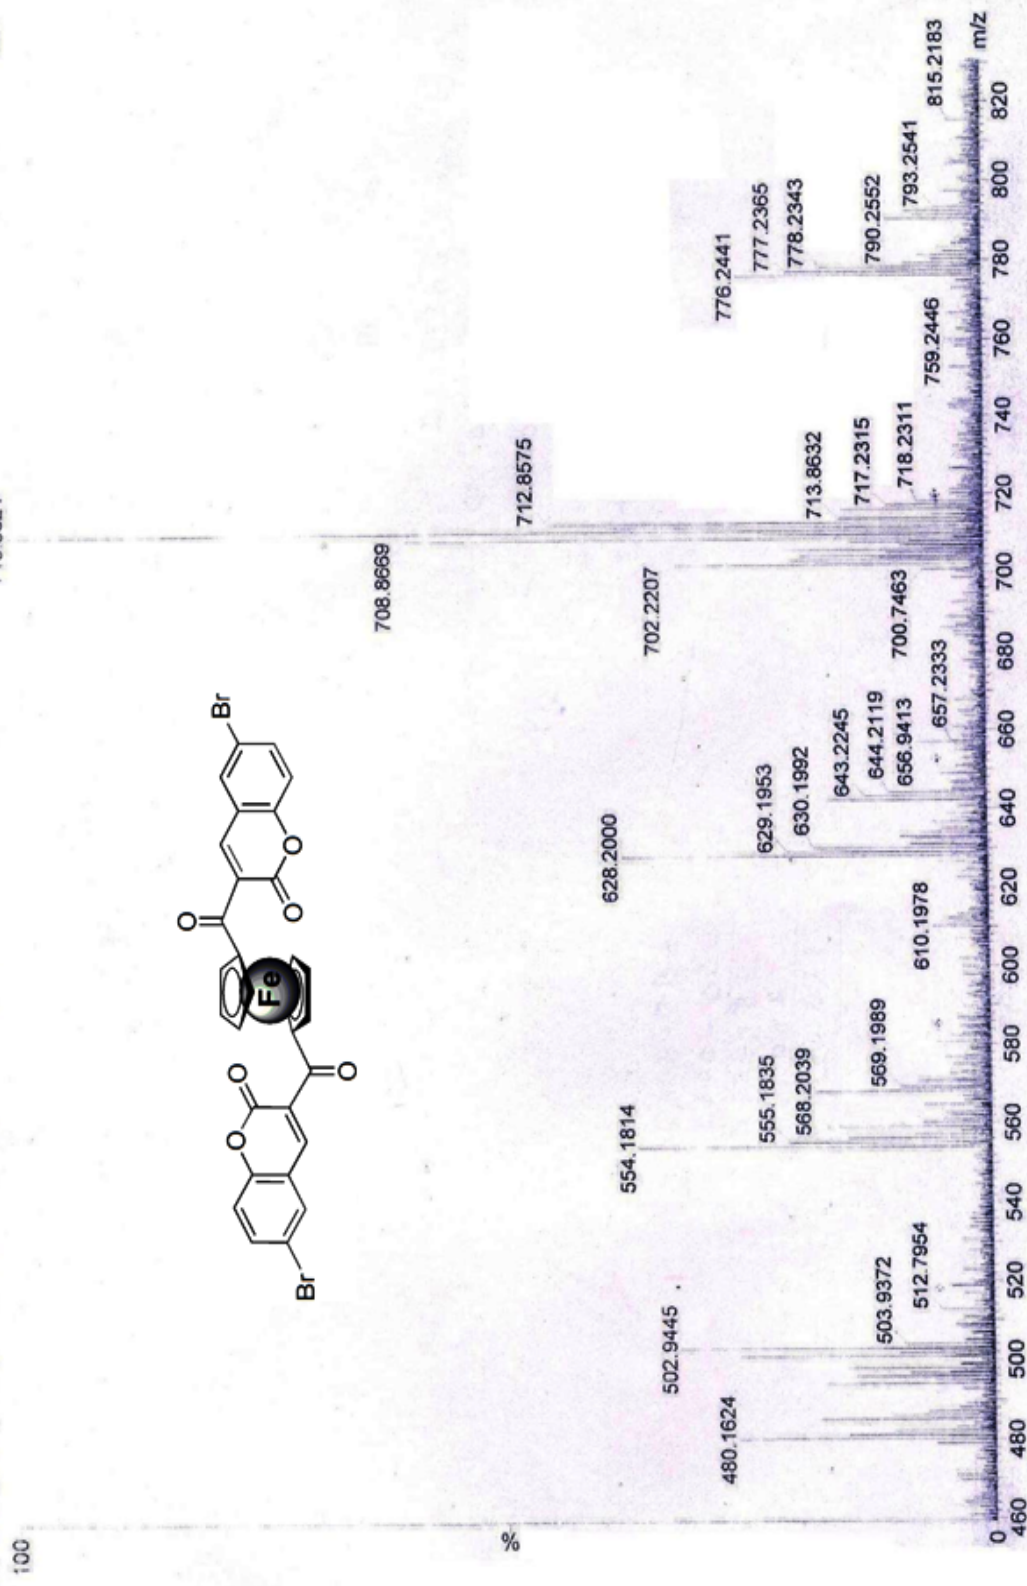

<sup>1</sup>H NMR Spectrum of 1,1'-Bis(2-methylsulfanyl-4-phenyl-quinoline-3-carbonyl)ferrocene 13a

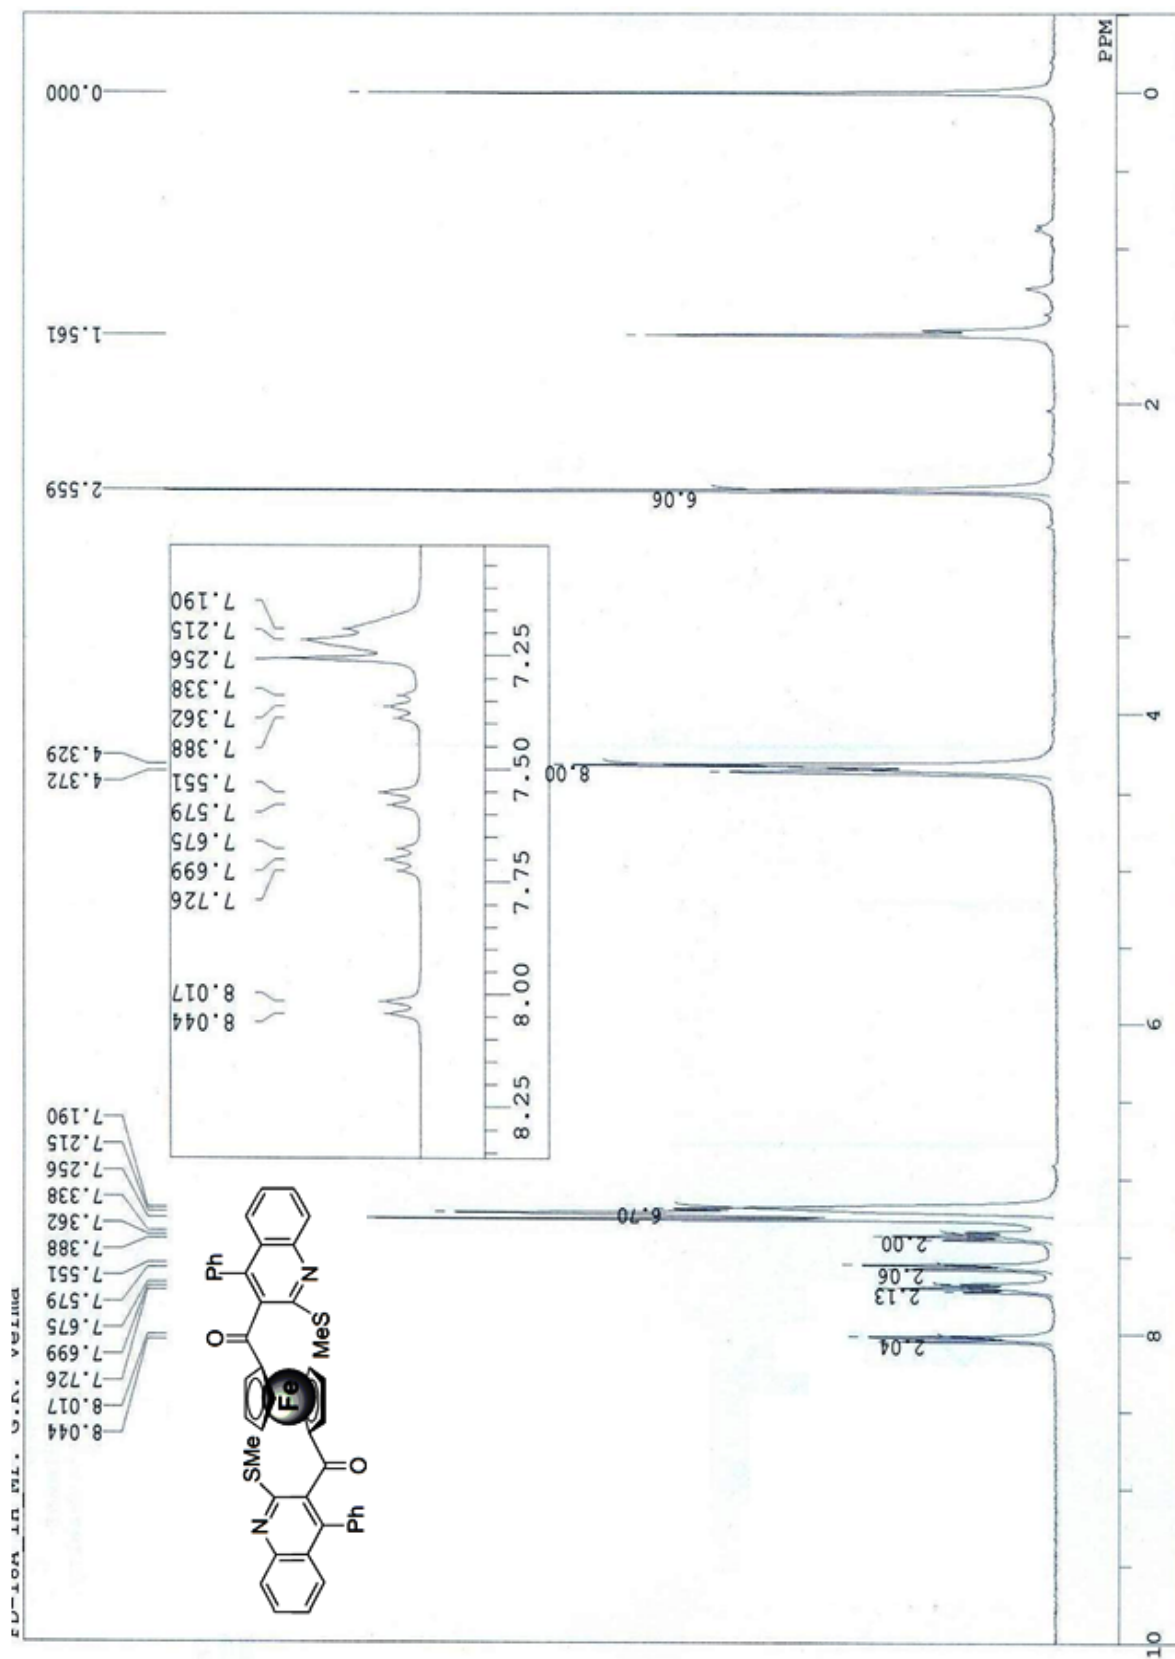

<sup>13</sup>C NMR Spectrum of 1,1'-Bis(2-methylsulfonyl-4-phenyl-quinoline-3-carbonyl)ferrocene 13a

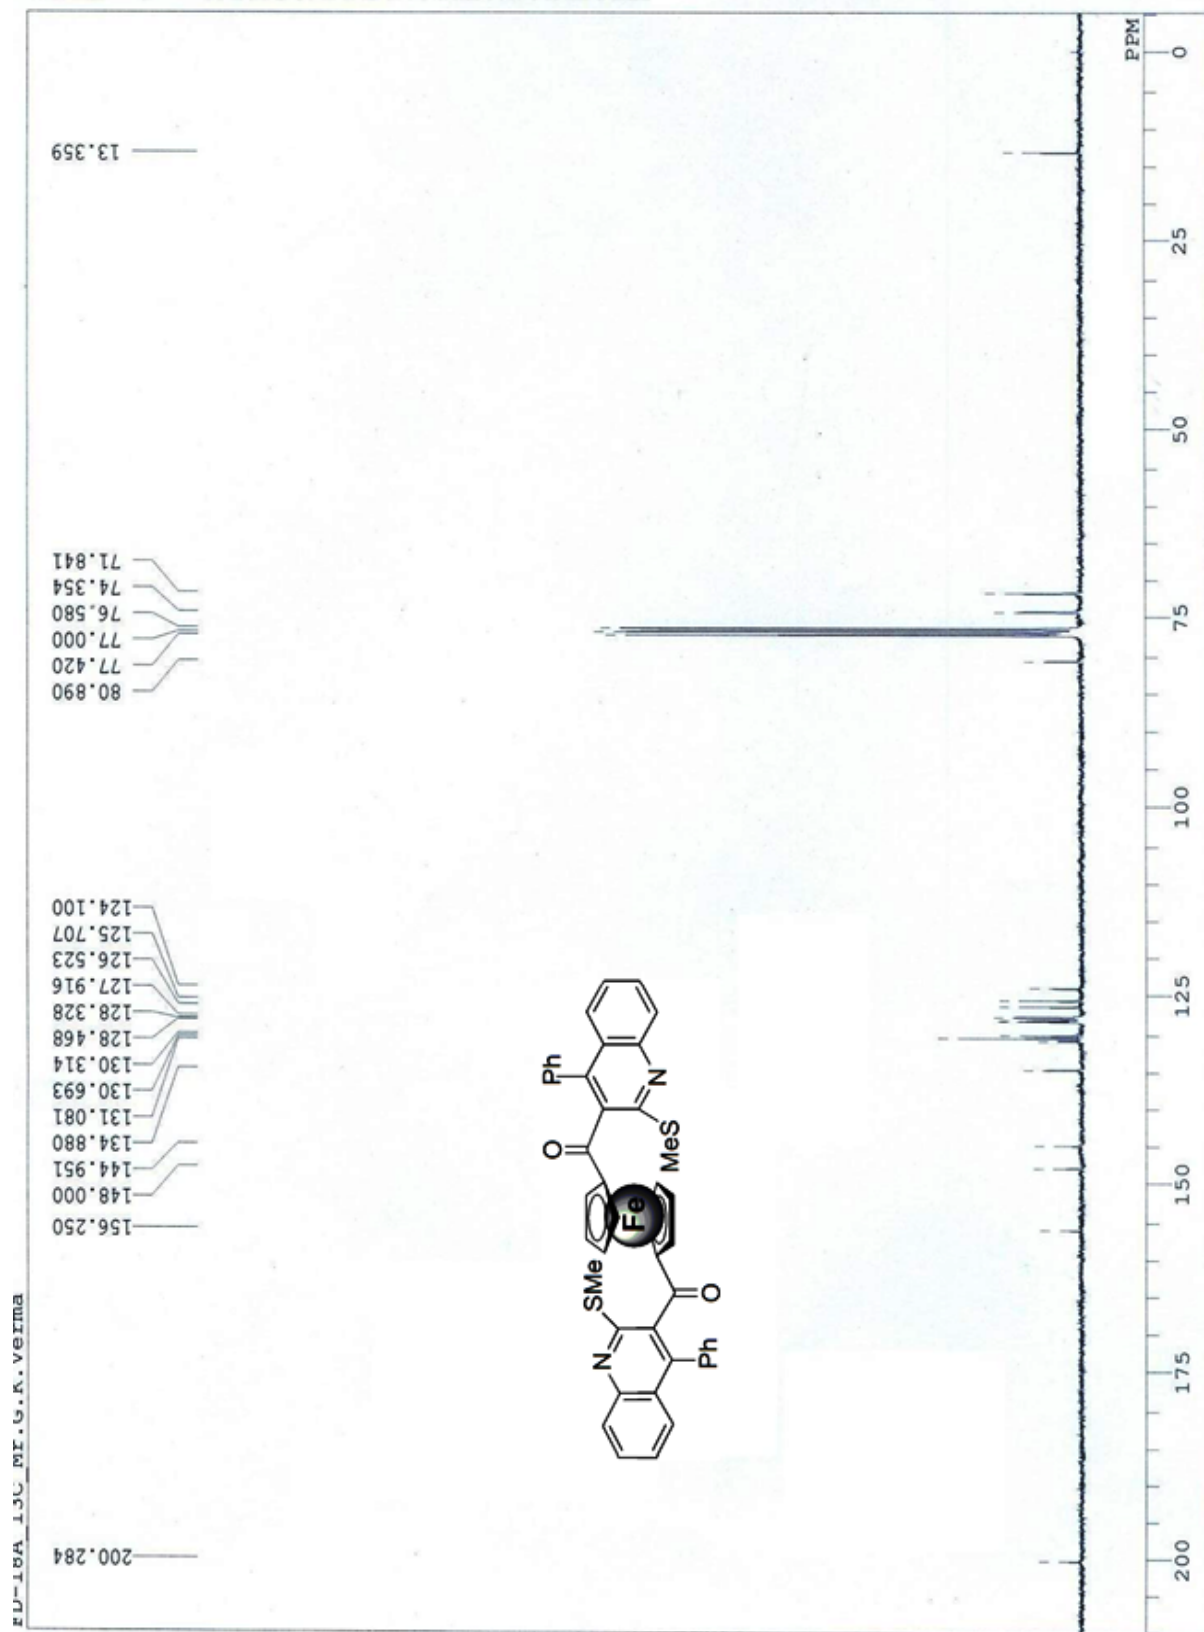

HRMS Spectrum of 1,1'-Bis(2-methylsulfonyl-4-phenyl-quinoline-3-carbonyl)ferrocene 13a

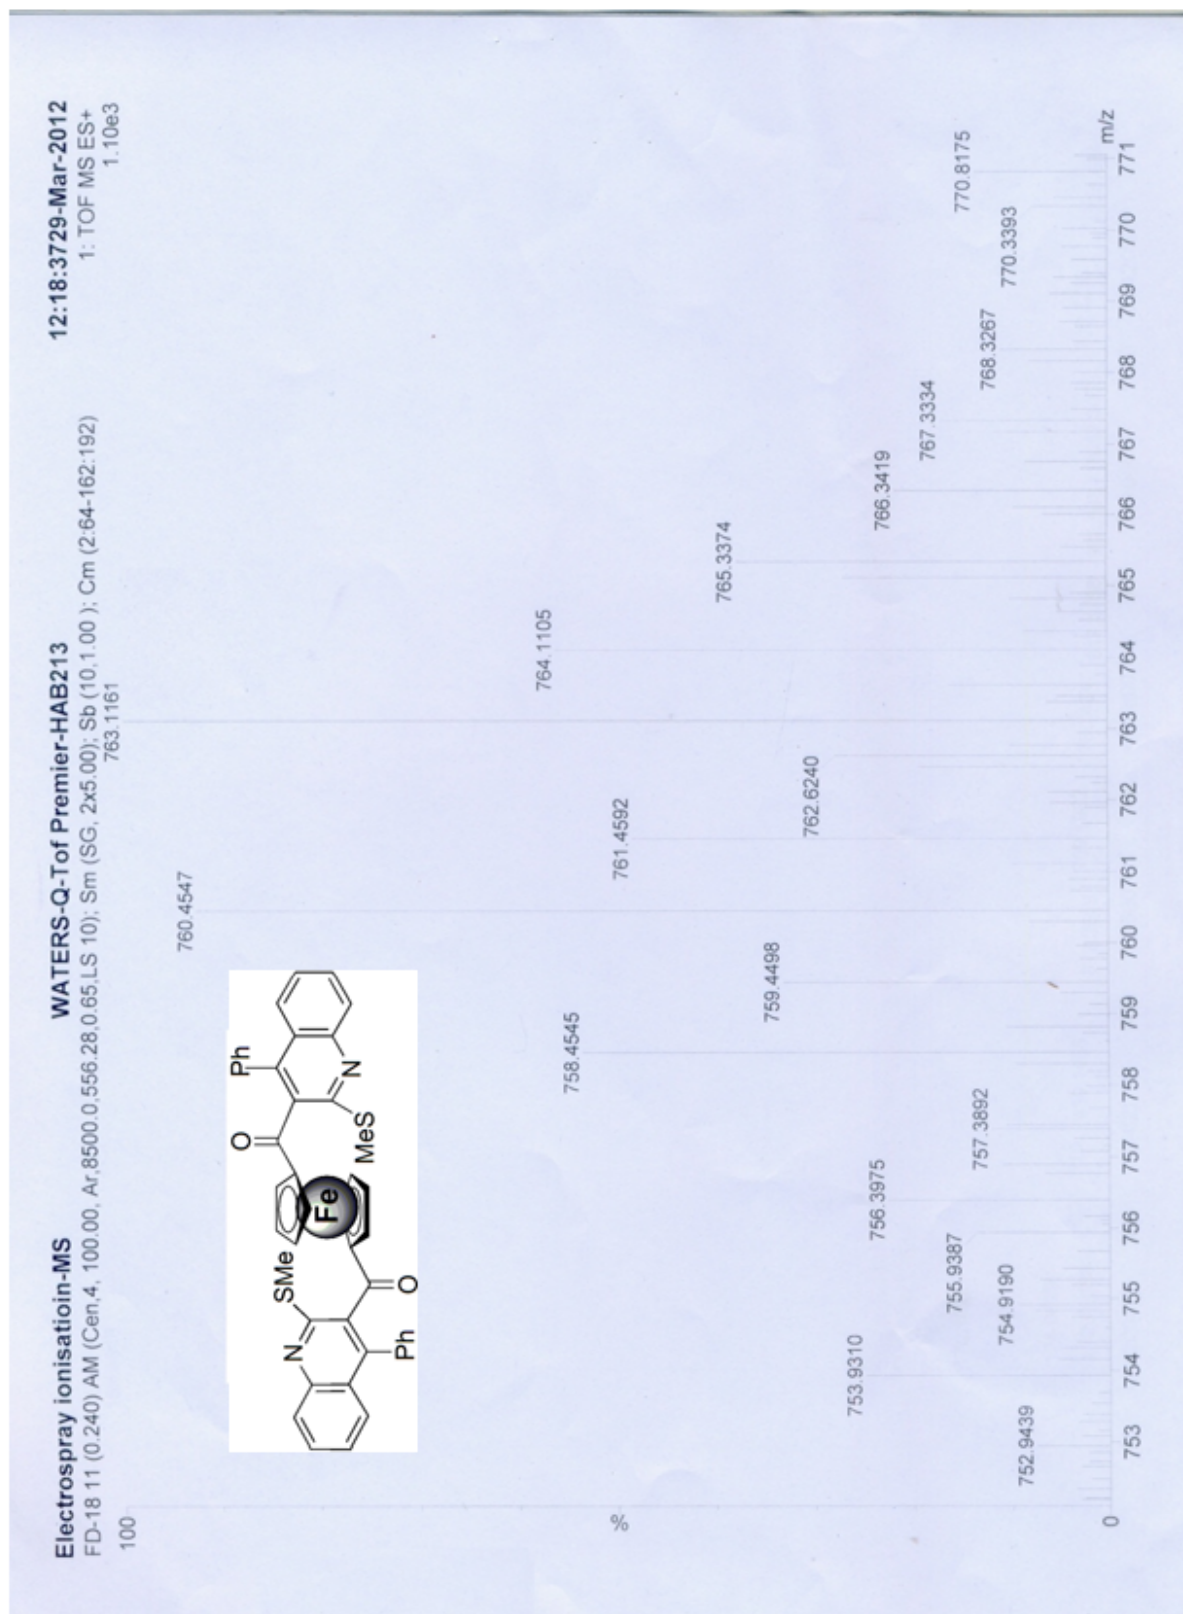

<sup>1</sup>H NMR Spectrum of 1,1'-Bis(2-methylsulfanyl-4-methyl-quinoline-3-carbonyl)ferrocene 13b

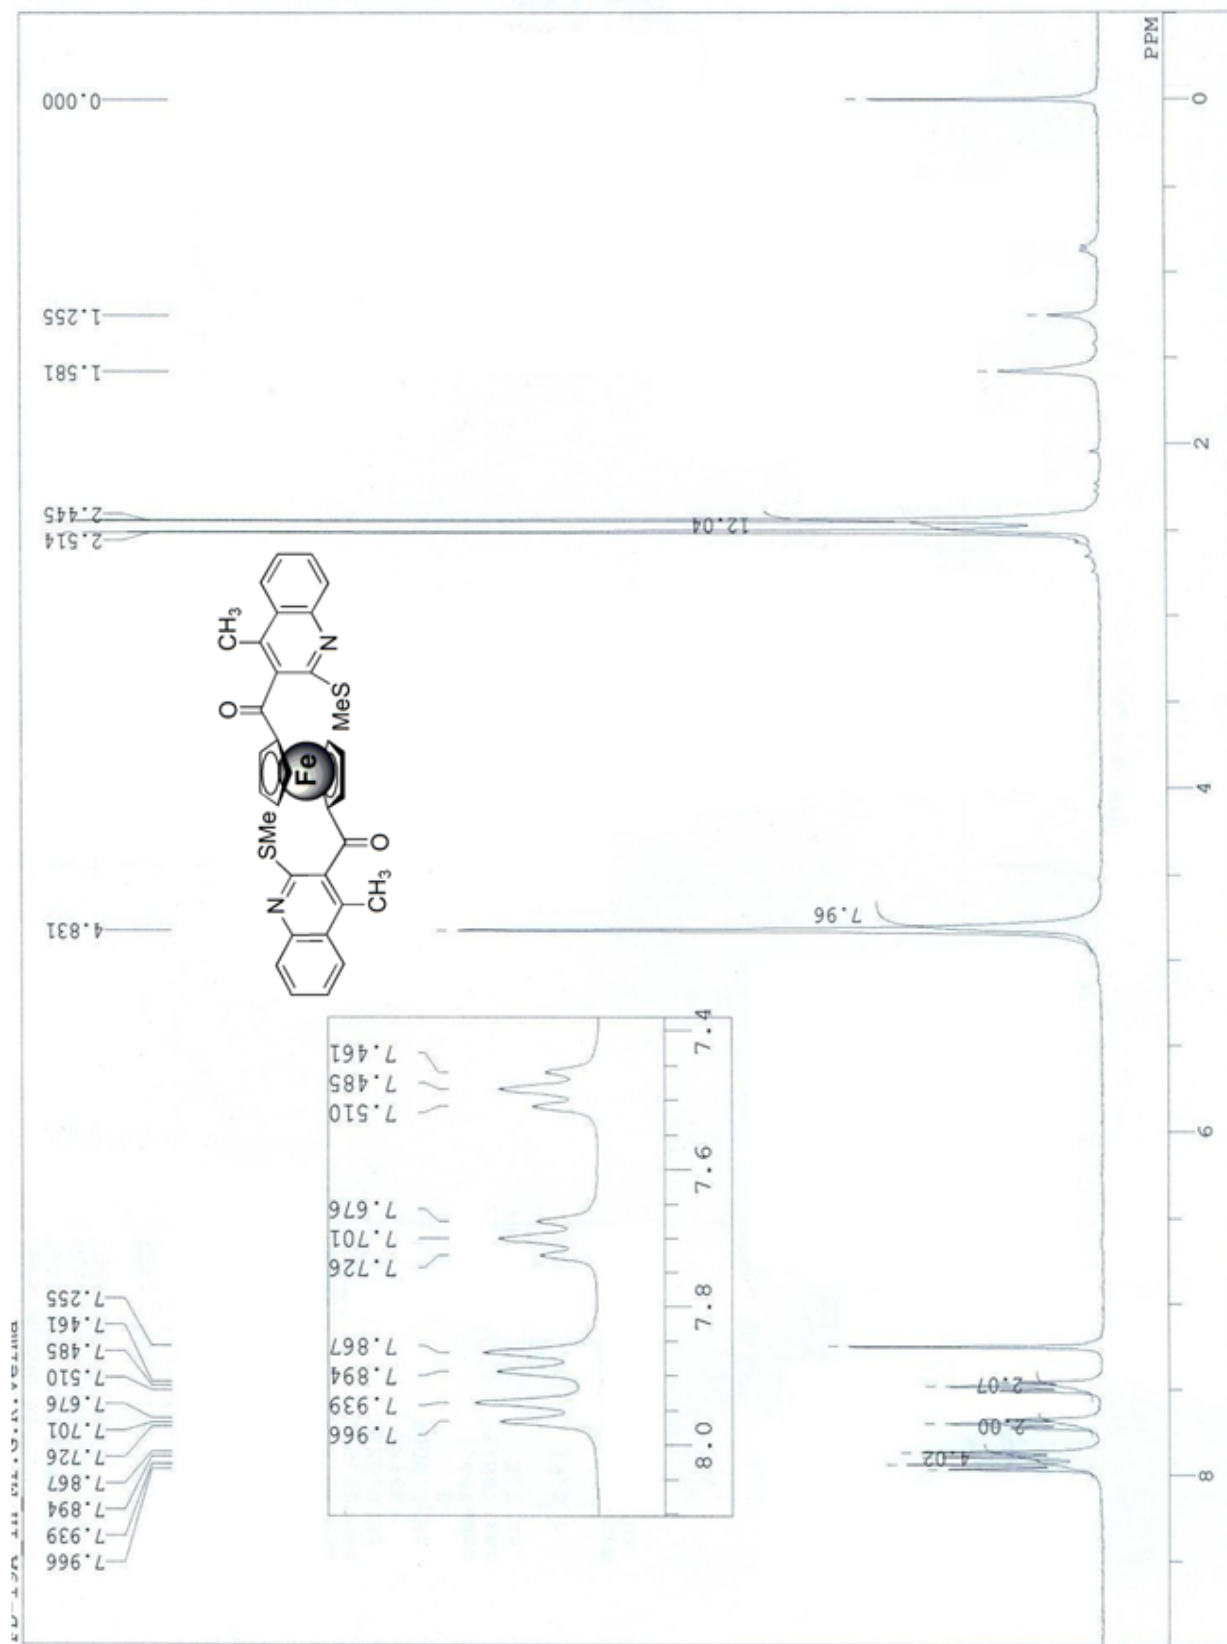



<sup>13</sup>C NMR Spectrum of 1,1'-Bis(2-methylsulfanyl-4-methyl-quinoline-3-carbonyl)ferrocene 13b

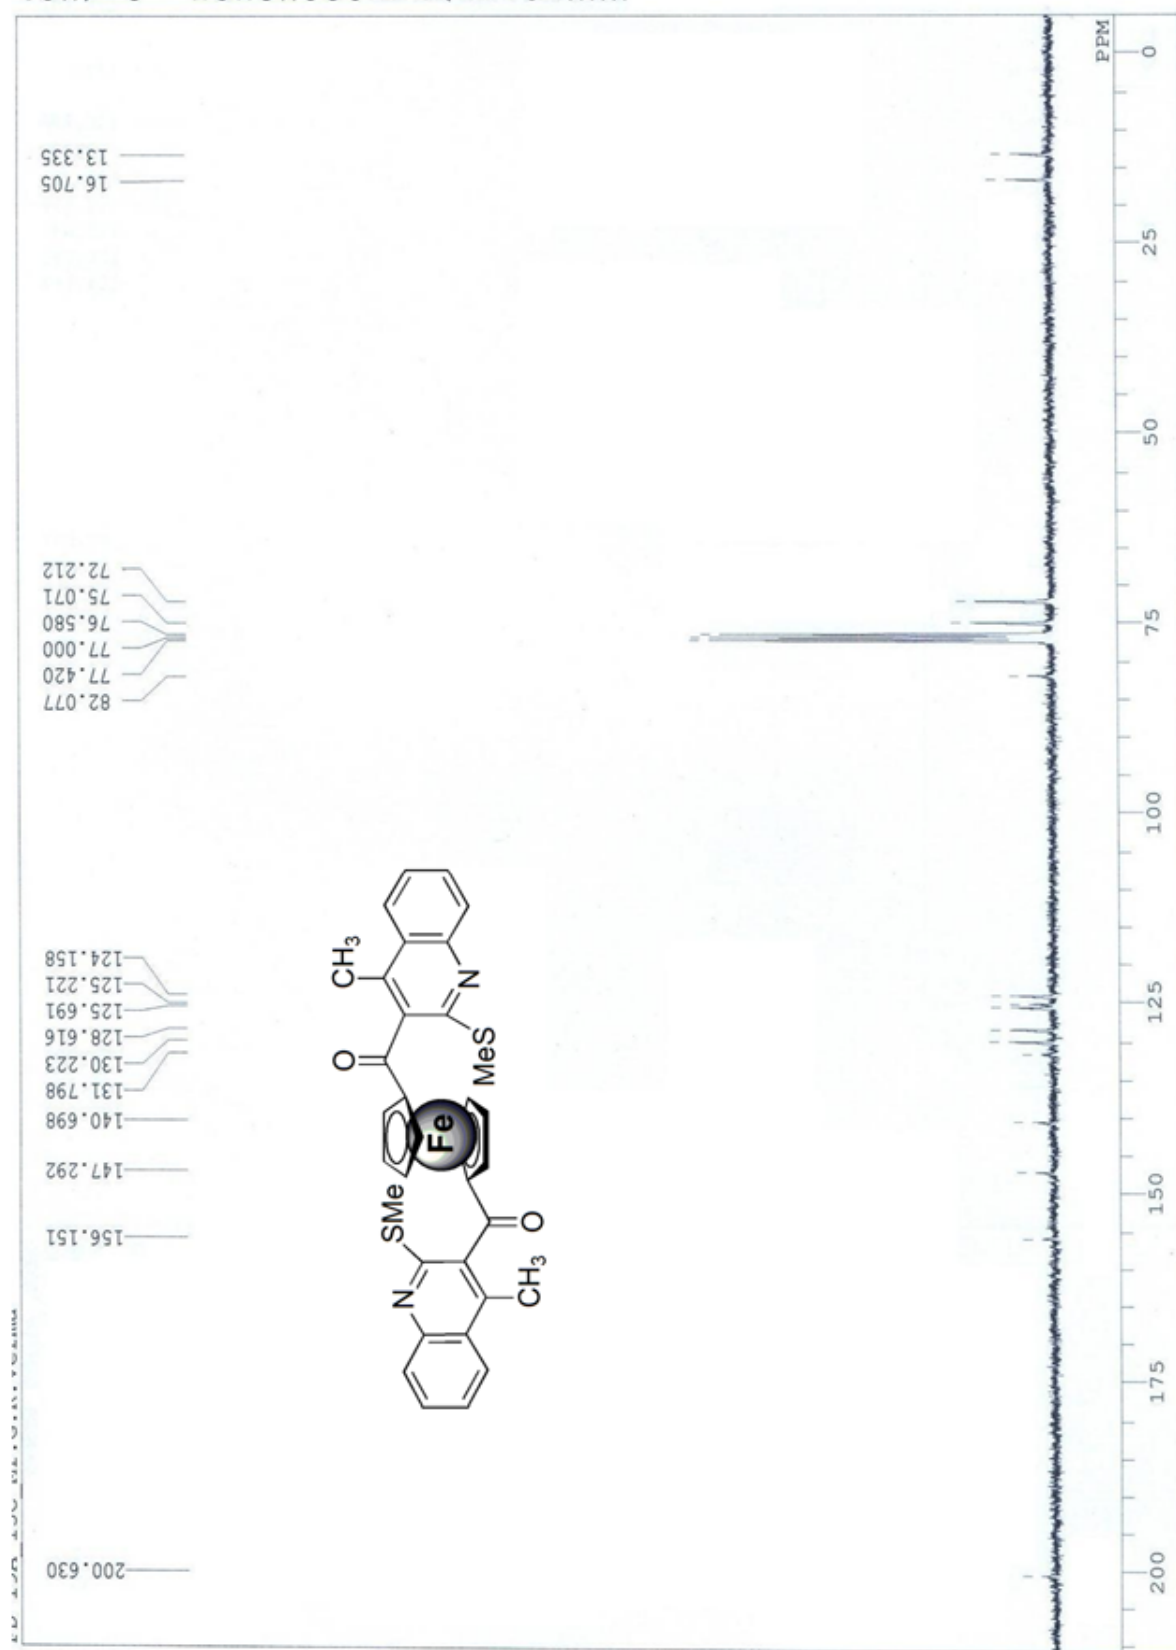

### HRMS Spectrum of 1,1'-Bis(2-methylsulfonyl-4-methyl-quinoline-3-carbonyl)ferrocene 13b

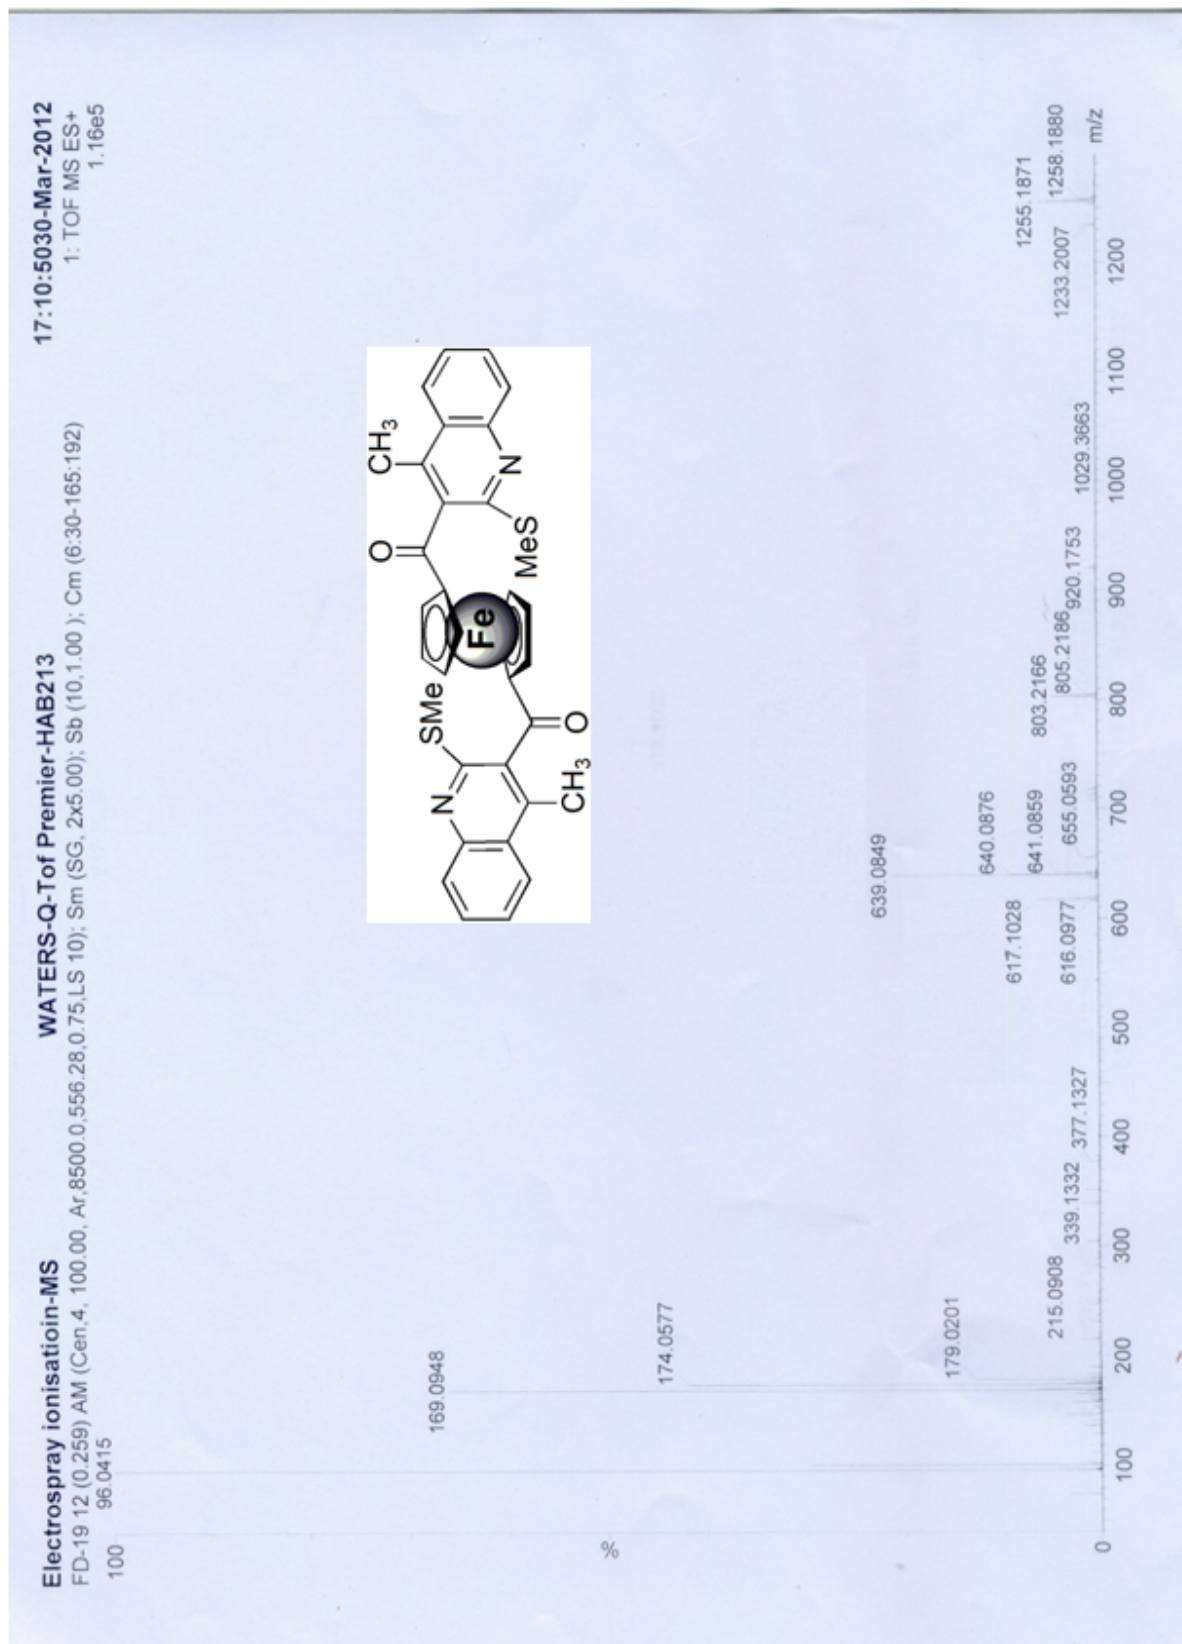

<sup>1</sup>H NMR Spectrum of 1,1'-Bis(1-(3,4-dimethoxyamino)-1-methylsulfonyl-3-oxo-1-propene)ferrocene 14

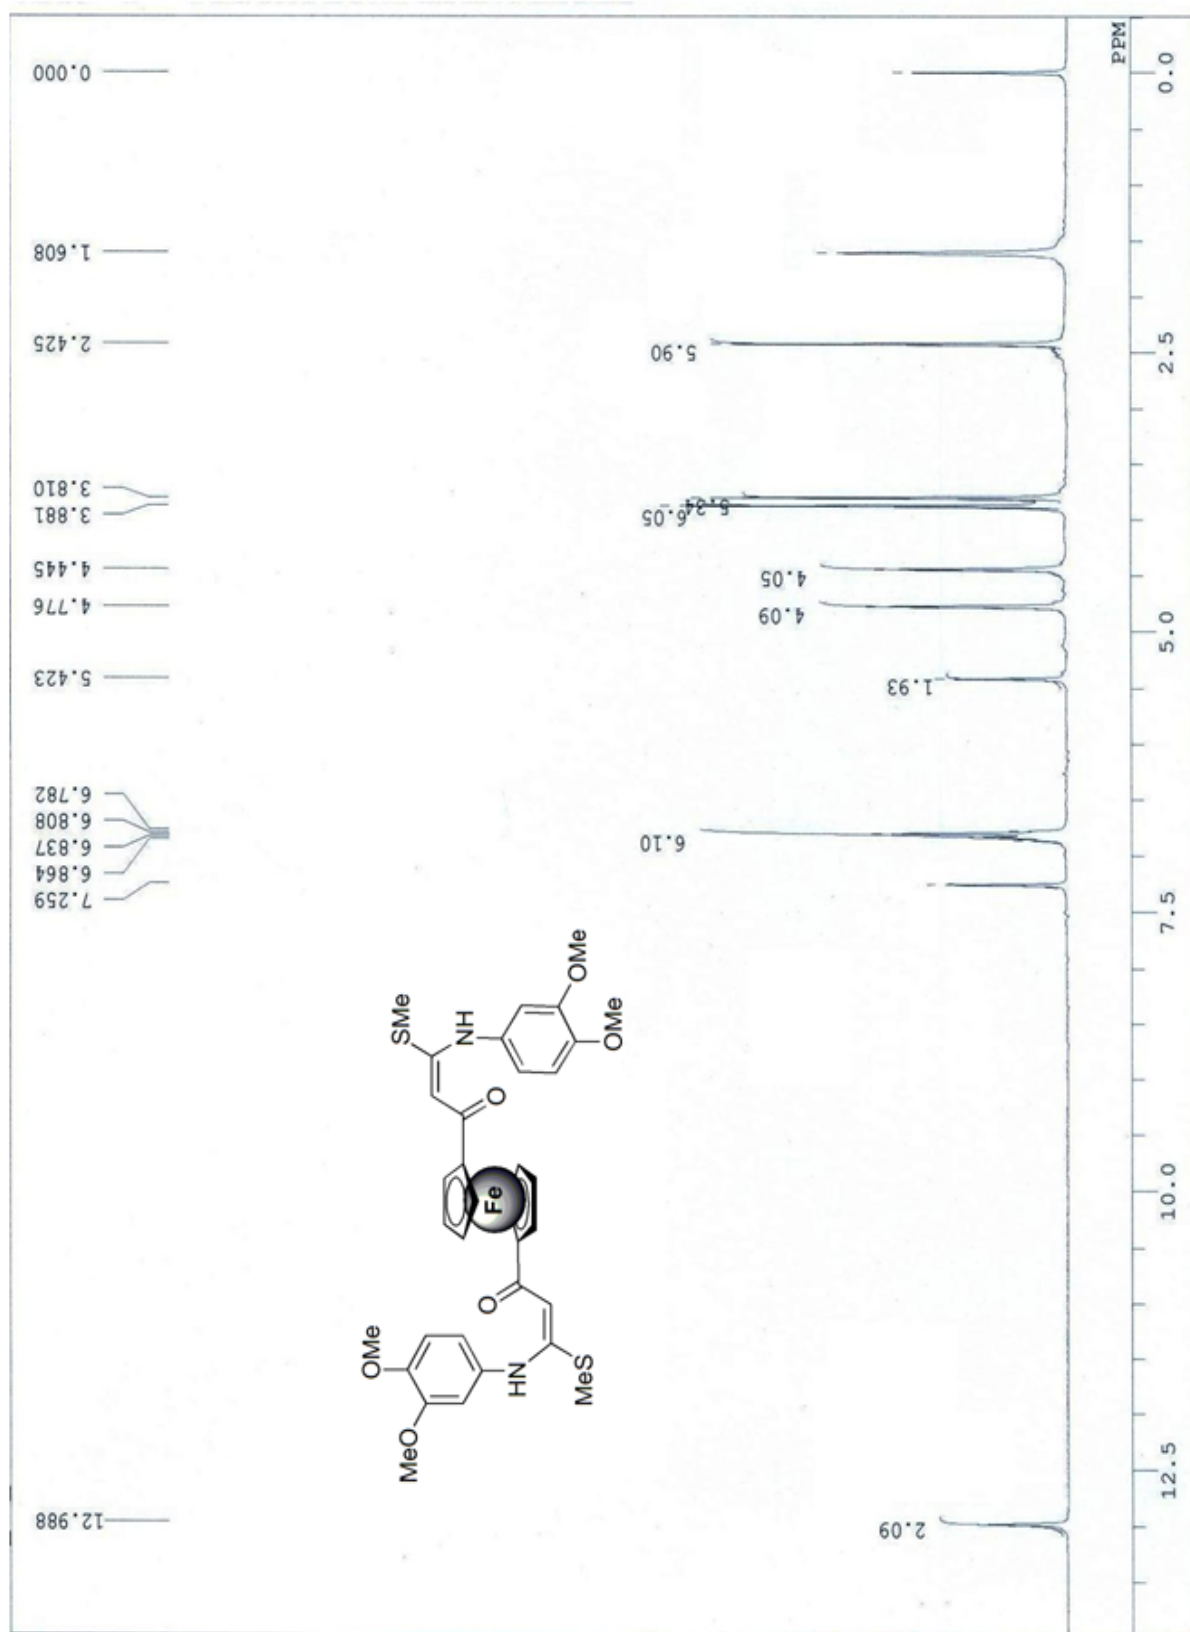

$^{13}\text{C}$  NMR Spectrum of **1,1'-Bis(1-(3,4-dimethoxyamino)-1-methylsulfonyl-3-oxo-1-propene)ferrocene** **14**

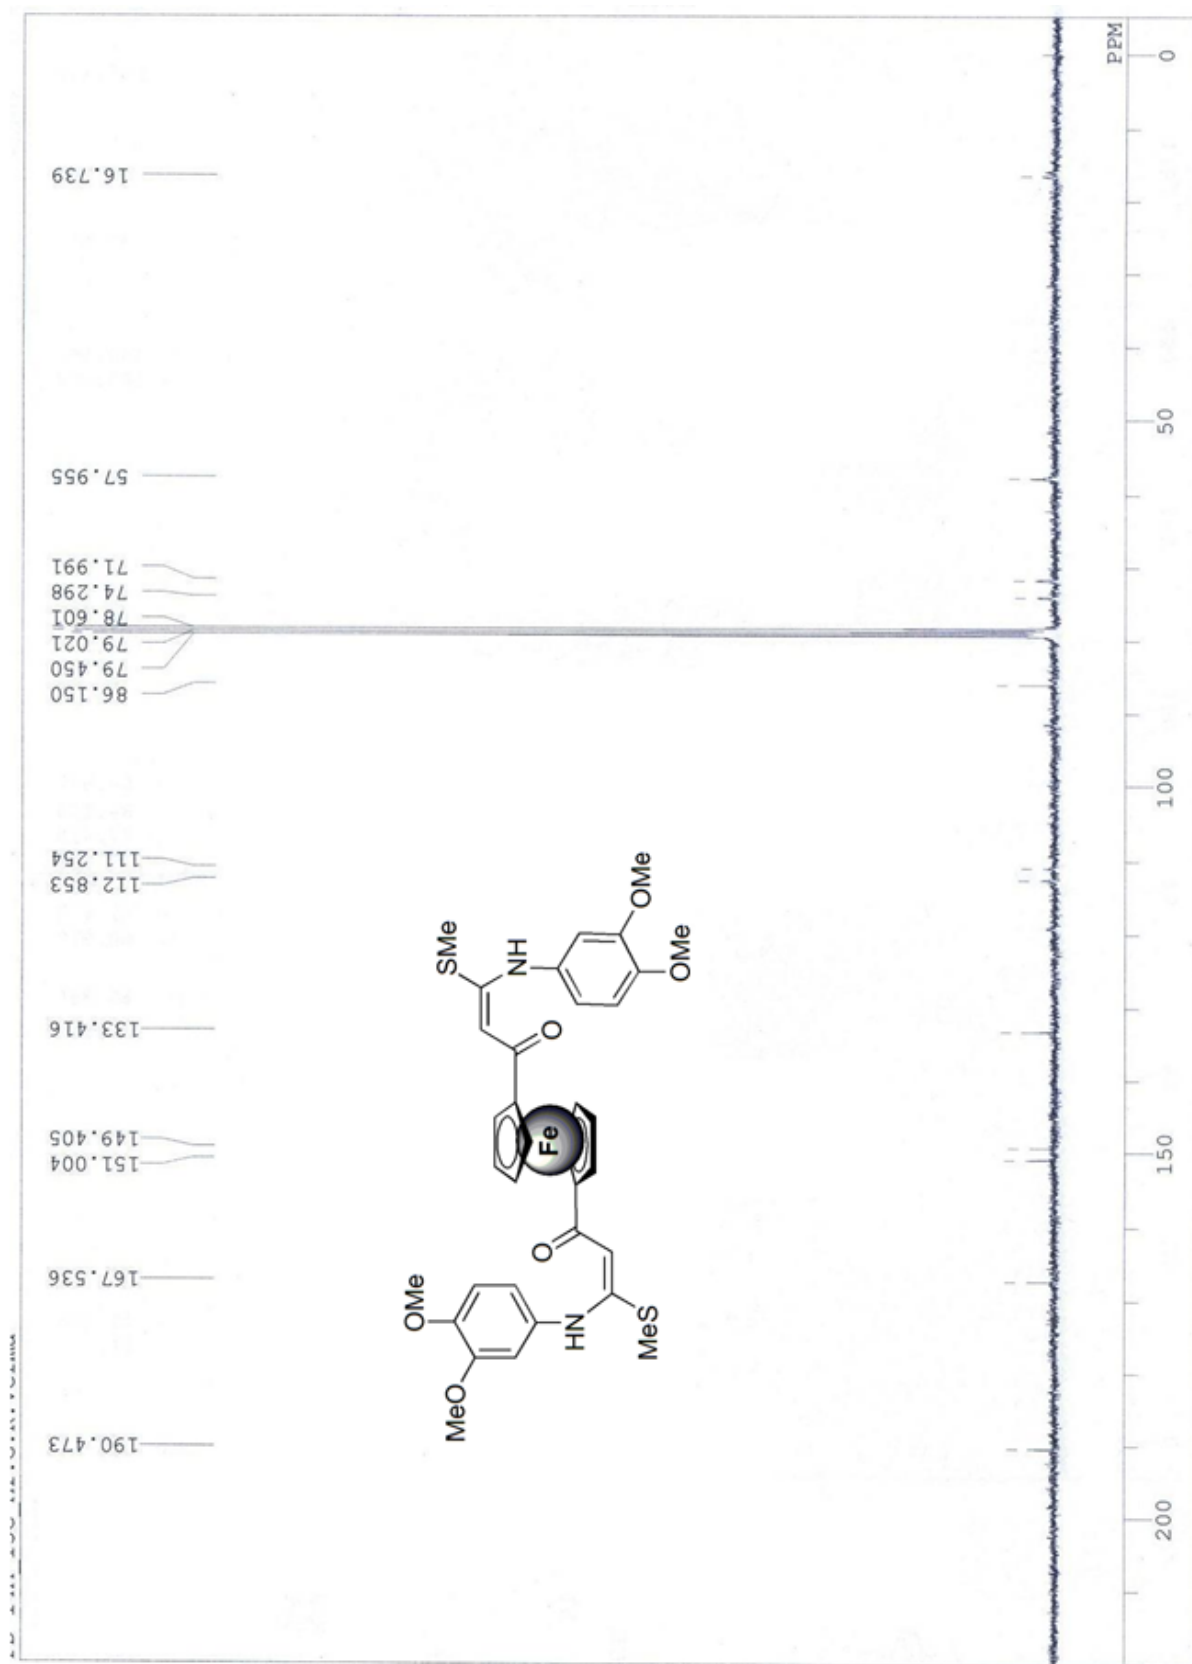

<sup>1</sup>H NMR Spectrum of 1,1'-Bis(6,7-dimethoxy-2-methylsulfanyl-quinoline-4-yl)ferrocene 15

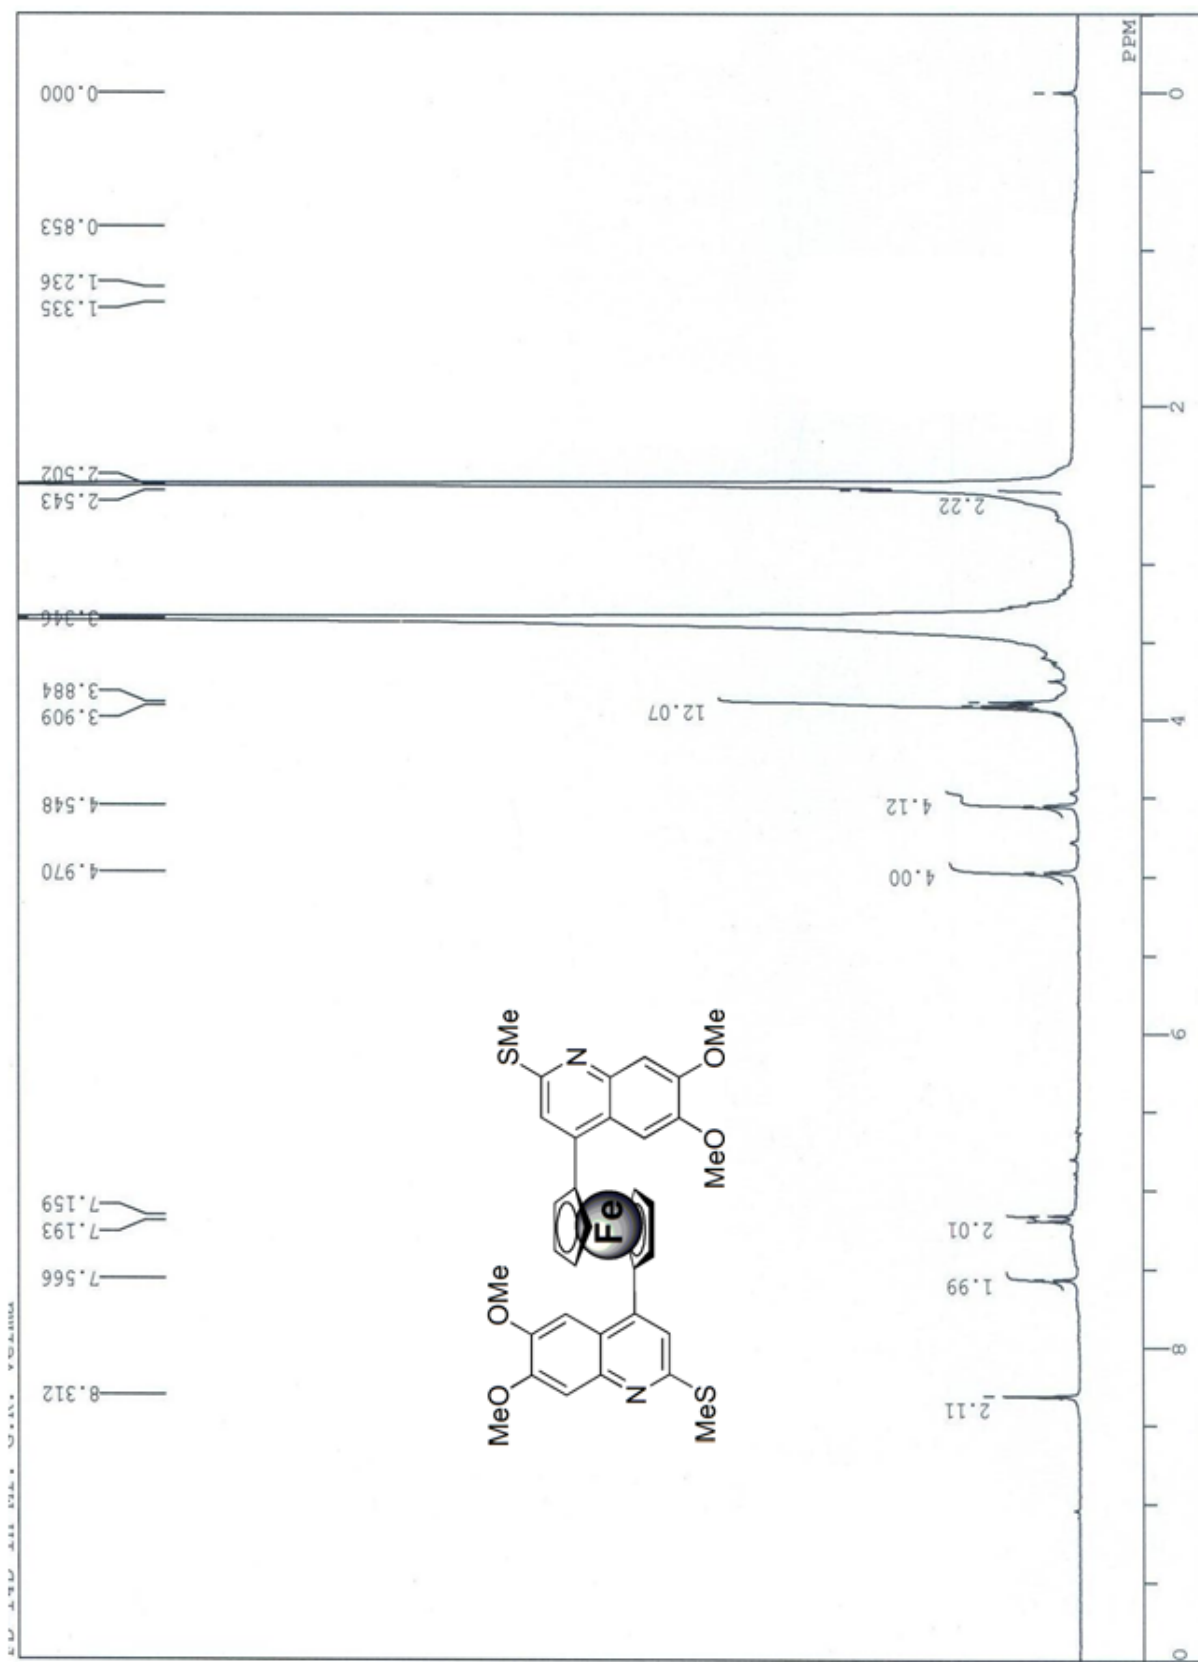

$^{13}\text{C}$  NMR Spectrum of 1,1'-Bis(6,7-dimethoxy-2-methylsulfanyl-quinoline-4-yl)ferrocene 15

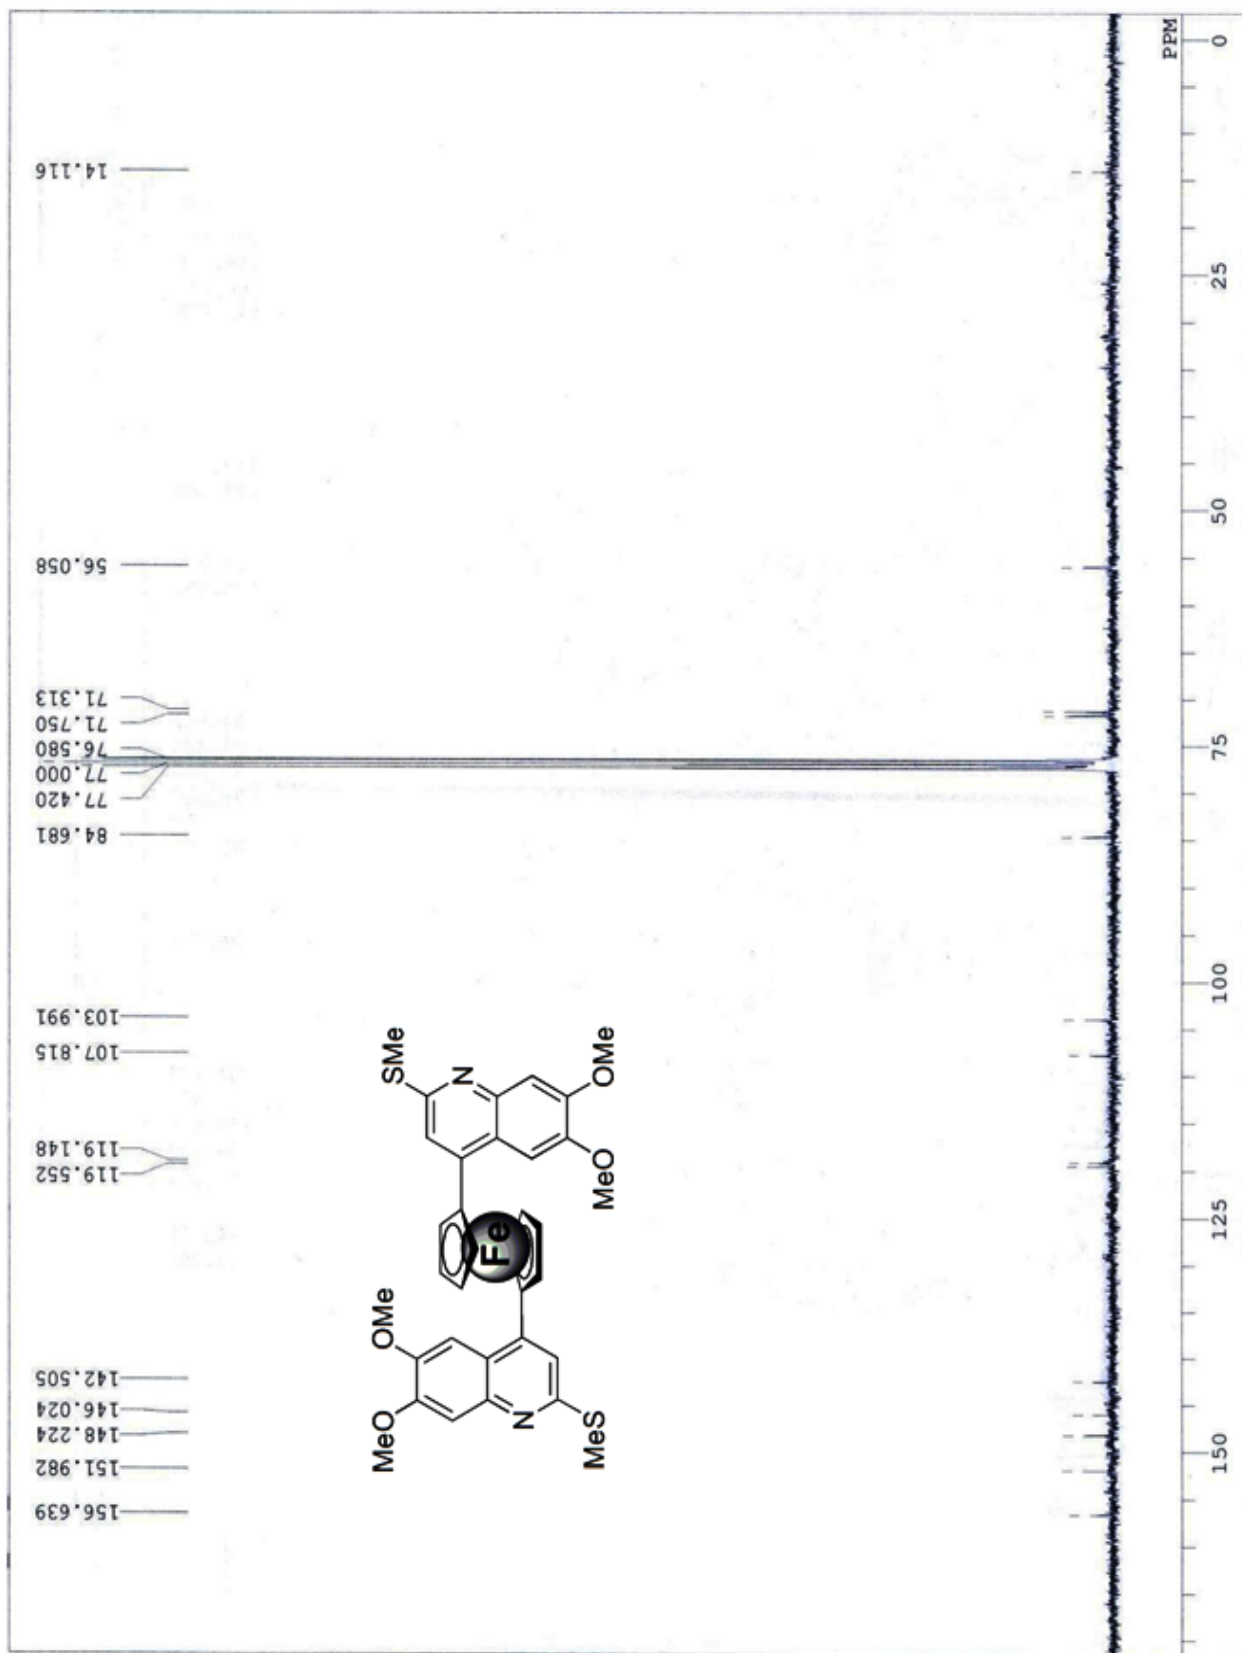

# HRMS Spectrum of 1,1'-Bis(6,7-dimethoxy-2-methylsulfanyl-quinoline-4-yl)ferrocene 15

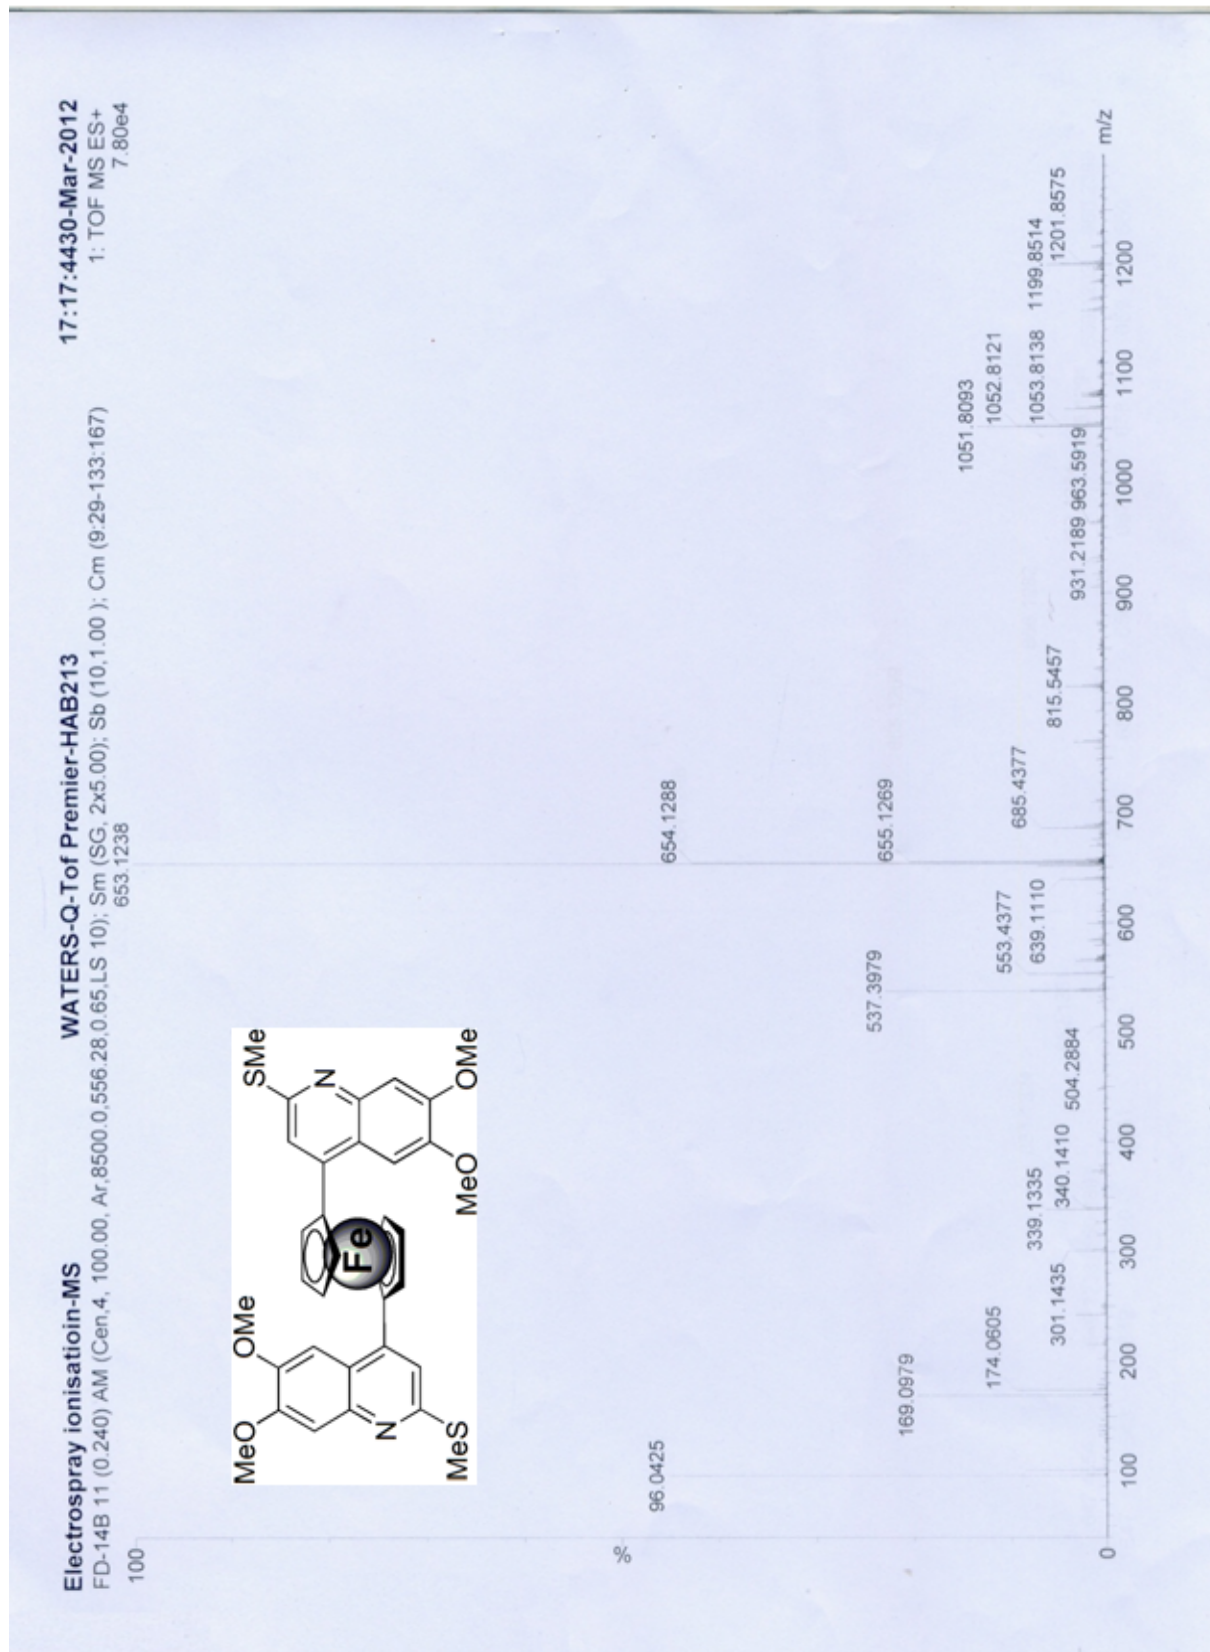

Supplement: c2ra21744a.pdf [file c2ra21744a.pdf]
